# Supplementary material for: Assessing the Limit of CO<sub>2</sub> Storage in Seawater as Bicarbonate-Enriched Solutions
Source: Preprints.org preprint supplement (doi:10.20944/preprints202407.2250.v1), 2024-07-29
Supplement: Supplementary file 1 [file supplementary]

## Sheet: Data introduction
CO2Sys constant used
pH Scale:	Total scale (mol/kg-SW)
CO2 Constants:	K1, K2 from Lueker et al., 2000
KSO4 Source:	Dickson, 1990
KF Source:	Perez and Fraga, 1987
Total Boron Source:	Lee et al., 2010
Equation Of State:	EOS-80
Series of seawater samples and experiments. Each row represents a set of experiments conducted with different DIC additions.
Code	Mode	Seawater	Environment	Treatment	MaxΔDIC	Initial DIC	Duration
					(µmol/L)	(µmol/L)	(days)
SN1	Single	Natural	Open	Ca(HCO3)2	7510	2370	90
SN2	Single	Natural	Open	Ca(HCO3)2	5650	2370	90
SA	Single	Artificial	Closed	NaHCO3	800	2000	3
MAM	Multiple	Artificial	Mixed	NaHCO3	3200	2000	24
MAC	Multiple	Artificial	Closed	NaHCO3	400	2800	16
MN	Multiple	Natural	Closed	NaHCO3	1000	2470	52

## Sheet: SN-1
		Data					CO2Sys
ΔDIC [µmol/L]	Time [d]	S	T [°C]	DIC [µmol/L]	TA [µeq/L]	pH	pCO2 [µatm]	ΩAr
SW	0.936111	36.01	23.4	2368.33	2537.97	8.0914	415.293	4.20601
	3.92014	36.39	22.15	2375	2597.92	8.12138	384.181	4.30421
	17.9569	37.73	18.2	2421.67	2595.92	8.14255	366.168	4.03123
	24.9521	38.04	19.2	2448.33	2633.89	8.13764	375.294	4.20049
	38.9701	39.34	17.2	2535.83	2753.8	8.08672	438.414	3.69089
	60.9493	38.91	18.15	2569.17	2671.86	8.01888	528.272	3.34201
	81.9319	41.04	16.8	2473.33	2599.92	8.09804	413.904	3.69438
	89.9424	41.54	20.8	2617.5	2739.81	8.10405	434.822	4.59505
7510	0.941667	35.72	23.05	7492.5	7348.12	7.81498	2609.6	8.93883
	3.92569	36.13	22.1	6113.33	6137.09	7.90792	1689.22	8.209
	17.9611	37.45	18	2849.17	2935.65	8.08777	494.983	4.25167
	24.9569	37.75	19	2461.67	2617.91	8.09488	420.805	3.82178
	38.9792	39.1	17.15	2140	2280.18	7.96232	504.035	2.33208
	60.9569	38.8	18.05	2379.17	2486.01	7.95291	575.737	2.65306
	81.9389	41.11	16.65	2097.5	2252.2	7.99638	452.221	2.48
	89.9479	41.65	20.4	2167.5	2160.27	8.00638	460.772	2.9936
3760	0.949306	35.83	23.1	5109.17	5157.87	8.08387	913.497	9.91151
	3.93333	36.22	22.2	4603.33	4918.07	8.14298	705.095	9.66526
	17.9694	37.84	18	2680	2803.76	8.11463	434.575	4.22469
	24.9646	38.4	19	2461.67	2597.92	8.10897	405.229	3.96198
	38.9868	40.88	16.9	2229.17	2402.08	8.02387	449.407	2.81371
	60.9639	39.18	18.3	2505.83	2595.92	7.98551	559.653	3.05277
	81.9479	41.61	16.8	2285.83	2392.09	8.04614	435.513	3.05191
	89.9542	42.2	20.65	2324.17	2414.07	8.02843	467.485	3.44347
2500	0.956944	36.03	23.1	4240.83	4418.47	8.09136	743.209	8.11163
	3.93889	36.3	22.2	4106.67	4344.52	8.23878	490.026	10.2005
	17.975	37.72	18	3353.33	3601.12	8.18597	453.611	6.33189
	24.9681	38.21	18.9	3108.33	3341.33	8.16823	440.074	5.80393
	38.9917	39.86	16.8	2741.67	2923.66	8.14491	408.287	4.49422
	60.9688	40.05	18.25	2879.17	3141.49	8.02665	579.55	3.94598
	81.9542	42.76	16.7	2622.5	2653.88	8.0429	503.322	3.53444
	89.9618	43.24	20.9	2635.83	2789.77	8.05583	494.575	4.26435
1500	0.963889	36.05	23	3526.67	3663.07	8.08799	623.212	6.45708
	3.94514	36.42	22.2	3448.33	3713.03	8.20046	454.671	7.73134
	17.9792	37.93	17.95	3481.67	3826.94	8.25323	395.429	7.60555
	24.9722	38.32	19	3512.5	3760.99	8.25922	392.586	8.05415
	38.9972	40.07	16.8	3541.67	3914.87	8.26423	387.569	7.71889
	60.9861	40.1	19.15	3769.17	4050.76	8.14826	558.939	7.13521
	81.9625	42.77	17	3745	3876.9	8.23178	444.007	7.88232
	89.9688	43.33	21	3941.67	4116.71	8.20986	496.157	9.18444
680	0.969444	36.09	23	2923.33	3079.54	8.07888	528.601	5.11813
	3.95278	36.3	22.2	2917.5	2993.61	8.15878	428.889	5.81506
	17.9868	37.61	18	2956.67	3141.49	8.18132	404.933	5.41321
	24.9778	37.93	19.1	2941.67	3173.46	8.21564	368.988	6.02767
	39.0028	39.77	16.8	3003.33	3265.39	8.20518	383.396	5.64533
	60.9944	39.43	18.9	3112.5	3287.37	8.09156	533.858	5.0059
	81.9708	41.86	17.25	3076.67	3229.42	8.17766	420.302	5.68156
	89.975	42.23	21.1	3245	3279.38	8.15081	477.491	6.49947
360	0.976389	36.05	23	2670.83	2743.8	8.07899	482.906	4.60249
	3.95764	36.46	22.2	2694.17	2923.66	8.13236	423.62	5.083
	17.9938	38.16	18	2747.5	2895.68	8.18169	375.194	5.01091
	24.9826	38.79	19.15	2775.83	2883.69	8.16126	399.522	5.08627
	39.0118	41.08	17.1	2875	3085.53	8.14081	431.97	4.81009
	61.0021	41.97	18.9	3037.5	3151.48	8.07148	545.897	4.76171
	81.9771	45.23	17.3	3120	3285.37	8.13191	479.095	5.36606
	89.9819	46.35	21.4	3218.33	3391.29	8.1537	469.642	6.68416
70	0.980556	36.12	22.9	2450.83	2581.93	8.08751	433.419	4.25328
	3.96389	36.44	22.3	2471.67	2615.91	8.12373	397.435	4.53248
	17.9993	38.56	18	2564.17	2701.84	8.11948	409.818	4.09866
	24.9896	39.28	19.3	2601.67	2745.8	8.13225	402.894	4.51305
	39.0208	42.04	17.2	2666.67	2933.65	8.1249	416.852	4.34003
	61.0132	41.76	19	2793.33	2989.61	8.02848	559.693	3.98578
	81.984	45.11	17.5	2894.17	2933.65	8.11801	460.654	4.80732
	89.9882	46.22	21.5	2960.83	3173.46	8.10652	488.636	5.5709

## Sheet: SN-2
		Data					CO2Sys
ΔDIC [µmol/L]	Time [d]	S	T [°C]	DIC [µmol/L]	TA [µeq/L]	pH	pCO2 [µatm]	ΩAr
SW	0.936111	36.01	23.4	2368.33	2537.97	8.0914	415.293	4.20601
	3.92014	36.39	22.15	2375	2597.92	8.12138	384.181	4.30421
	17.9569	37.73	18.2	2421.67	2595.92	8.14255	366.168	4.03123
	24.9521	38.04	19.2	2448.33	2633.89	8.13764	375.294	4.20049
	38.9701	39.34	17.2	2535.83	2753.8	8.08672	438.414	3.69089
	60.9493	38.91	18.15	2569.17	2671.86	8.01888	528.272	3.34201
	81.9319	41.04	16.8	2473.33	2599.92	8.09804	413.904	3.69438
	89.9424	41.54	20.8	2617.5	2739.81	8.10405	434.822	4.59505
5650	1.11736	35.87	23.3	6558.33	6440.85	7.82443	2233.48	7.88274
	4.09722	35.91	23.1	5558.33	5651.48	7.94167	1419.14	8.19906
	18.0924	37.13	18.5	2960.83	3127.5	8.11115	486.158	4.74998
	25.1062	37.21	20.25	2617.5	2757.79	8.07223	476.157	4.06747
	39.1118	38.11	17.8	2209.17	2452.04	8.06224	408.083	3.03446
	61.1181	37.95	18.75	2660	2817.75	7.95853	637.744	3.08912
	82.1104	39.78	19.05	2280.83	2372.1	8.07895	403.714	3.48382
	90.1187	39.95	22.1	2300	2438.05	8.00728	491.139	3.37285
2820	1.12778	35.7	23.5	4630	4738.21	8.04149	923.026	8.21334
	4.10139	36.08	22.9	4350	4672.26	8.20261	571.743	10.392
	18.0958	37.36	18.3	3065	3183.45	8.16091	442.944	5.44929
	25.1104	37.57	19.8	2805	2935.65	8.13983	428.817	4.99339
	39.1174	38.74	17.6	2525	2593.92	8.05474	474.172	3.46299
	61.1278	38.75	18.9	2573.33	2745.8	7.98363	579.099	3.18932
	82.1181	40.86	18.9	2479.17	2398.08	8.0651	453.389	3.7282
	90.1236	41.23	21.5	2438.33	2432.05	8.03834	479.705	3.79775
1880	1.14236	35.97	23.4	3880.83	4044.76	8.0535	749.458	6.82604
	4.10694	36.05	23	3733.33	4042.77	8.20699	485.195	8.78684
	18.1	37.48	18.3	3519.17	3776.98	8.24157	412.944	7.52655
	25.1153	37.67	19.9	3307.5	3627.1	8.22384	406.962	7.16932
	39.1257	38.74	17.65	3017.5	3339.33	8.18791	404.506	5.58184
	61.1319	38.9	18.5	3945	4204.64	8.18097	538.943	7.71604
	82.1229	41.13	18.3	3977.5	4148.68	8.28735	408.936	9.76373
	90.1306	41.32	21.6	4079.17	4350.52	8.24842	465.194	10.3942
1130	1.15417	35.93	23.55	3326.67	3437.25	8.06908	617.852	5.92582
	4.11111	36.12	22.9	3245.83	3367.31	8.18351	448.331	7.11179
	18.1042	37.44	18.3	3250.83	3421.26	8.22469	398.619	6.63995
	25.1188	37.59	19.9	3287.5	3419.26	8.24707	380.784	7.4503
	39.1326	38.8	17.8	3301.67	3603.12	8.17718	455.017	6.08483
	61.1396	38.78	18.7	3411.67	3533.17	8.09293	583.827	5.47919
	82.1299	40.9	18.6	3470	3591.13	8.20001	449.049	7.08672
	90.1368	41.15	21.7	3574.17	3725.02	8.19126	474.349	8.00241
510	1.16806	35.91	23.5	2798.33	2929.66	8.07599	510.695	4.92427
	4.11736	36.14	23	2751.67	2949.64	8.14278	422.39	5.45113
	18.109	37.38	18.4	2830	2925.66	8.16214	407.752	5.01133
	25.1222	37.66	20	2815	3027.58	8.1882	380.035	5.57762
	39.1382	38.75	17.8	2855.83	3037.57	8.1463	425.941	4.84489
	61.1444	39.08	18.7	2970.83	3043.57	8.05204	563.063	4.31233
	82.1382	41.29	18.75	3035	3003.6	8.13224	467.538	5.35332
	90.1458	41.5	21.7	3058.33	3151.48	8.14419	458.654	6.12072
270	1.17847	35.99	23.5	2642.5	2763.79	8.07478	483.551	4.60972
	4.1375	36.11	23.3	2650.83	2781.77	8.11881	433.044	5.03203
	18.1167	37.58	18.6	2660	2743.8	8.12316	423.119	4.35593
	25.1299	37.82	20.2	2702.5	2801.76	8.14933	403.139	4.9692
	39.1438	39.2	17.9	2756.67	2925.66	8.15525	401.47	4.78246
	61.1521	38.9	19	2844.17	2835.73	8.03348	565.405	3.98579
	82.1493	41.05	19.1	2775	2737.81	8.11111	451.675	4.68806
	90.1514	41.33	21.8	2925	2985.61	8.13304	451.713	5.70689
60	1.18681	35.93	23.55	2448.33	2591.93	8.09508	425.576	4.41784
	4.14306	36.08	23.25	2512.5	2496	8.10373	426.651	4.58477
	18.1229	37.54	18.6	2526.67	2637.89	8.11828	406.973	4.06952
	25.1368	37.81	20.3	2539.17	2707.83	8.13369	394.355	4.50467
	39.1521	39.18	18	2575.83	2717.83	8.1306	399.565	4.22947
	61.1611	39.06	19.05	2672.5	2719.82	8.00314	572.878	3.49943
	82.1583	41.42	19.1	2720	2655.88	8.08092	477.786	4.32091
	90.1576	41.65	22	2736.67	2821.74	8.10973	448.737	5.10271

## Sheet: SA
		Data					CO2Sys
ΔDIC [µmol/L]	Time [d]	S	T [°C] *	DIC [µmol/L]	TA [µeq/L]	pH	pCO2 [µatm]	ΩAr			* T average on 3h
0	0	35	18.5	2188.33	2062	7.66	1082.24	1.24319
	2.92	35	17.6	2096.67	2080	8.029	425.071	2.58919
0	0	35	17.5	2197.5	2010	7.57	1333.29	0.977527
	2.93	35	20	2103.33	2078	7.929	550.158	2.29786
400	0	35	16.6	2551.67	2308	7.62	1370.93	1.22676
	1.91667	35	20.3	2430	2424	7.981	559.995	3.00303
400	0	35	17	2584.17	2436	7.55	1637.35	1.07612
	2.8	35	16.8	2455	2420	7.962	584.825	2.5454
800	0	35	20.2	2927.5	2728	7.58	1762.23	1.48568
	2.79582	35	18.8	2758.33	2840	8.004	597.417	3.3807
800	0	35	18.5	2954.17	2784	7.63	1567.45	1.56822
	1.8	35	20.7	2811.67	2780	8.006	609.879	3.72119

## Sheet: MAM
		Data					CO2Sys
ΔDIC [µmol/L]	Time [d]	S	T [°C]	DIC [micromol/L]	TA (µeq/Lsw)	pH	pCO2 [µatm]	ΩAr
0	0	34.28	13.4	2200	1898.35	7.60042	1215.45	0.877596
	3	0		2095	2028.24
400	3	34.13	15.1	2480	2383.93	7.9691	578.399	2.40993
	6	34.19	17.8	2450	2767.59	8.01244	519.687	2.90498
800	6	34.87	13.9	2848.33	3117.29	7.978	644.549	2.70011
	8	35.96	17	2769.17	2909.47	8.03417	550.934	3.48745
1200	8	34.64	16	3170.83	3265.16	7.99608	693.709	3.38603
	13	35.32	15.3	3094.17	3111.3	8.06261	571.59	3.83832
1600	13	35.34	14.4	3418.33	3431.02	8.0182	701.687	3.66757
	15	35.61	18.9	3381.67	3425.02	8.05085	650.606	4.70603
2000	15	35.46	17	3724.17	3730.76	8.01984	769.107	4.41321
	17	35.15	18.6	3659.17	3610.86	8.09291	634.414	5.47058
2200	17	34.75	17	3975	3940.58	7.4585	3111.29	1.32685
	20	37.04	15.3	3997.5	3890.62	8.057	744.179	5.1428
2800	20	35.73	14.7	4439.17	4719.9	8.02959	885.978	4.91155
	22	36.07	17.8	4427.5	4474.11	8.09041	767.543	6.5418
3200	22	35.97	16.9	4890	5027.63	8.05712	918.711	6.16372
	24	36.1	18.7	4492.5	4454.13	7.81865	1520.71	2.94414

## Sheet: MAC
		Data					CO2Sys
ΔDIC [µmol/L]	Time (d)	S	T [°C]	DIC [micromol/L]	TA (µeq/Lsw)	pH	pCO2 in [µatm]	ΩAr
0	0.0104167	34.3	17.5	2956.67	2977.41	7.74505	1193.05	1.934
	0.170125	34.32	18.4	2943.33	2997.4	7.83052	973.171	2.413
	0.172208	34.32	18.4	2938.33		7.83052	971.518	2.409
	1.04375	34.3	18.9	2846.67		8.00999	609.662	3.514
	2.04875	33.11	19.1	2855.83	2879.5	8.07781	520.448	4.023
	3.0225	33.34	19.9	2860.83		8.10125	492.167	4.381
	4.01292	34.23	20.7	2844.17	2893.49	8.10873	478.795	4.623
	6.99417	34.43	18.3	2800.83	2945.44	8.10494	472.375	4.141
400	7.00458	33.18	18.5	3198.33	3369.07	8.06366	602.312	4.295
	7.17125	34.4	19.7	3237.5	3351.09	8.06204	610.612	4.627
	7.98583	34.41	19.6	3222.5		8.08171	578.371	4.783
	8.96583	34.35	20.6	3221.67	3217.2	8.09283	564.044	5.077
	10.0167	0		3184.17
	10.9904	34.4	19.7	3210.83	3239.19
	13.9821	34.41	19.6	3191.67	3285.15
	16.0092	34.35	20.6	3140.83	3259.17

## Sheet: MN
ΔDIC [µmol/L]	Time (d)	S	T [°C]	DIC [micromol/L]	TA (µeq/Lsw)	pH	pCO2 in [µatm]	ΩAr
600	0	38.27	21.4	2472.5	2589.75	8.29787	249.698	6.102
	0	38.34	21.6	2378.33	2939.45	8.2933	243.059	5.863
	0.0104167	37.55	19.6	3074.17	3185.23	8.09167	530.943	4.666
	0.0729167	36.12	20.3	3030	3243.18	7.96448	723.986	3.543
	0.154167	36.06	20.8	3066.67		7.97397	717.168	3.726
	0.315417	35.53	20.9	3053.33	3273.16	8.01965	639.074	4.073
	3.02375	36	17.5	3045	3203.22	8.15531	447.975	4.781
	4.09333	35.56	18.1	3033.33		8.20136	398.173	5.32
	5.11125	35.76	19.3	2992.5	3133.28	8.19962	395.124	5.479
	6.0375	35.79	19.9	3010.83	3357.08	8.18303	415.276	5.45
1000	6.07417	35.69	19.8	3392.5	3766.73	8.10959	564.434	5.486
	6.22542	35.95	20.9	3420.83	3470.98	8.10487	576.825	5.727
	7.10042	36.09	20.7	3403.33	3496.96	8.23081	414.598	7.32
	10.1179	35.94	18.5	3360		8.31865	324.526	7.934
	11.1879	38.87	20.1	3365	3576.89	8.12293	535.119	5.882
	12.1463	38.96	19.8	3287.5		8.18542	444.828	6.46
	13.0358	38.76	20	3372.5	3796.7	8.40862	251.723	10.262
	17.0775	39.02	17.6	3362.5	3512.95	8.20077	435.658	6.303
	21.0454	38.97	21.4	3345.83	3562.9	8.17749	463.036	6.853
	24.0204	39.35	20	3296.67	3502.96	8.28846	339.907	8.031
	27.9925	39	20.7	3336.67	3656.82	8.24113	390.602	7.568
	30.9833	39.27	20	3346.67	3524.94	8.25107	381.126	7.572
	52.0667	37.65	24.6	3322.5	3614.86	8.33717	301.762	10.225

## Sheet: measured CO2 - MAC
Date		Time [d]	CO2 [ppm]
2024-02-02	12:12:52	0			First injection	2.84722	d
2024-02-02	12:22:52	0.00694444	626		Second injection	9.875	d
2024-02-02	12:32:52	0.0138889	628
2024-02-02	12:42:52	0.0208333	624
2024-02-02	12:52:52	0.0277778	623
2024-02-02	13:02:52	0.0347222	617
2024-02-02	13:12:52	0.0416667	627
2024-02-02	13:22:52	0.0486111	632
2024-02-02	13:32:52	0.0555556	627
2024-02-02	13:42:52	0.0625	622
2024-02-02	13:52:52	0.0694444	626
2024-02-02	14:02:52	0.0763889	631
2024-02-02	14:12:52	0.0833333	621
2024-02-02	14:22:52	0.0902778	626
2024-02-02	14:32:52	0.0972222	622
2024-02-02	14:42:52	0.104167	628
2024-02-02	14:52:52	0.111111	624
2024-02-02	15:02:52	0.118056	630
2024-02-02	15:12:52	0.125	620
2024-02-02	15:22:52	0.131944	626
2024-02-02	15:32:52	0.138889	634
2024-02-02	15:42:52	0.145833	628
2024-02-02	15:52:52	0.152778	630
2024-02-02	16:02:52	0.159722	635
2024-02-02	16:12:52	0.166667	635
2024-02-02	16:22:52	0.173611	634
2024-02-02	16:32:52	0.180556	637
2024-02-02	16:42:52	0.1875	636
2024-02-02	16:52:52	0.194444	632
2024-02-02	17:02:52	0.201389	633
2024-02-02	17:12:52	0.208333	631
2024-02-02	17:22:52	0.215278	630
2024-02-02	17:32:52	0.222222
2024-02-02	17:42:52	0.229167	628
2024-02-02	17:52:52	0.236111	627
2024-02-02	18:02:52	0.243056	628
2024-02-02	18:12:52	0.25	627
2024-02-02	18:22:52	0.256944	625
2024-02-02	18:32:52	0.263889	631
2024-02-02	18:42:52	0.270833	629
2024-02-02	18:52:52	0.277778	623
2024-02-02	19:02:52	0.284722	630
2024-02-02	19:12:52	0.291667	623
2024-02-02	19:22:52	0.298611	626
2024-02-02	19:32:52	0.305556	623
2024-02-02	19:42:52	0.3125	619
2024-02-02	19:52:52	0.319444	620
2024-02-02	20:02:52	0.326389	621
2024-02-02	20:12:53	0.333333	617
2024-02-02	20:22:53	0.340278	621
2024-02-02	20:32:53	0.347222	621
2024-02-02	20:42:53	0.354167	617
2024-02-02	20:52:53	0.361111	612
2024-02-02	21:02:53	0.368056	622
2024-02-02	21:12:53	0.375	619
2024-02-02	21:22:53	0.381944	616
2024-02-02	21:32:53	0.388889	620
2024-02-02	21:42:53	0.395833	620
2024-02-02	21:52:53	0.402778	619
2024-02-02	22:02:53	0.409722	618
2024-02-02	22:12:53	0.416667	621
2024-02-02	22:22:53	0.423611	626
2024-02-02	22:32:53	0.430556	633
2024-02-02	22:42:53	0.4375	627
2024-02-02	22:52:53	0.444444	629
2024-02-02	23:02:53	0.451389	628
2024-02-02	23:12:53	0.458333	623
2024-02-02	23:22:53	0.465278	627
2024-02-02	23:32:53	0.472222	628
2024-02-02	23:42:53	0.479167	627
2024-02-02	23:52:53	0.486111	623
2024-03-02	00:02:53	0.493056	628
2024-03-02	00:12:53	0.5	626
2024-03-02	00:22:53	0.506944	631
2024-03-02	00:32:53	0.513889	626
2024-03-02	00:42:53	0.520833	622
2024-03-02	00:52:53	0.527778	623
2024-03-02	01:02:53	0.534722	624
2024-03-02	01:12:53	0.541667	627
2024-03-02	01:22:53	0.548611	618
2024-03-02	01:32:53	0.555556	622
2024-03-02	01:42:53	0.5625	621
2024-03-02	01:52:53	0.569444	622
2024-03-02	02:02:53	0.576389	626
2024-03-02	02:12:53	0.583333	625
2024-03-02	02:22:53	0.590278	623
2024-03-02	02:32:53	0.597222	614
2024-03-02	02:42:53	0.604167	614
2024-03-02	02:52:53	0.611111	619
2024-03-02	03:02:53	0.618056	618
2024-03-02	03:12:53	0.625	620
2024-03-02	03:22:53	0.631944	621
2024-03-02	03:32:53	0.638889	630
2024-03-02	03:42:53	0.645833	626
2024-03-02	03:52:53	0.652778	623
2024-03-02	04:02:53	0.659722	617
2024-03-02	04:12:53	0.666667	624
2024-03-02	04:22:53	0.673611	618
2024-03-02	04:32:53	0.680556	619
2024-03-02	04:42:53	0.6875	621
2024-03-02	04:52:53	0.694444	623
2024-03-02	05:02:53	0.701389	624
2024-03-02	05:12:53	0.708333	624
2024-03-02	05:22:53	0.715278	630
2024-03-02	05:32:53	0.722222	624
2024-03-02	05:42:53	0.729167	625
2024-03-02	05:52:54	0.736111	624
2024-03-02	06:02:54	0.743056	626
2024-03-02	06:12:54	0.75	630
2024-03-02	06:22:54	0.756944	624
2024-03-02	06:32:54	0.763889	617
2024-03-02	06:42:54	0.770833	626
2024-03-02	06:52:54	0.777778	622
2024-03-02	07:02:54	0.784722	631
2024-03-02	07:12:54	0.791667	627
2024-03-02	07:22:54	0.798611	623
2024-03-02	07:32:54	0.805556	623
2024-03-02	07:42:54	0.8125	621
2024-03-02	07:52:54	0.819444	618
2024-03-02	08:02:54	0.826389	621
2024-03-02	08:12:54	0.833333	617
2024-03-02	08:22:54	0.840278	620
2024-03-02	08:32:54	0.847222	622
2024-03-02	08:42:54	0.854167	614
2024-03-02	08:52:54	0.861111	616
2024-03-02	09:02:54	0.868056	618
2024-03-02	09:12:54	0.875	615
2024-03-02	09:22:54	0.881944	621
2024-03-02	09:32:54	0.888889	621
2024-03-02	09:42:54	0.895833	626
2024-03-02	09:52:54	0.902778	621
2024-03-02	10:02:54	0.909722	621
2024-03-02	10:12:54	0.916667	621
2024-03-02	10:22:54	0.923611	619
2024-03-02	10:32:54	0.930556	625
2024-03-02	10:42:54	0.9375	620
2024-03-02	10:52:54	0.944444	620
2024-03-02	11:02:54	0.951389	615
2024-03-02	11:12:54	0.958333	617
2024-03-02	11:22:54	0.965278	618
2024-03-02	11:32:54	0.972222	621
2024-03-02	11:42:54	0.979167	620
2024-03-02	11:52:54	0.986111	618
2024-03-02	12:02:54	0.993056	617
2024-03-02	12:12:54	1	619
2024-03-02	12:22:54	1.00694	619
2024-03-02	12:32:54	1.01389	618
2024-03-02	12:42:54	1.02083	620
2024-03-02	12:52:54	1.02778	620
2024-03-02	13:02:54	1.03472	617
2024-03-02	13:12:54	1.04167	608
2024-03-02	13:22:54	1.04861	616
2024-03-02	13:32:54	1.05556	623
2024-03-02	13:42:54	1.0625	619
2024-03-02	13:52:54	1.06944	624
2024-03-02	14:02:54	1.07639	624
2024-03-02	14:12:54	1.08333	629
2024-03-02	14:22:54	1.09028	624
2024-03-02	14:32:54	1.09722	625
2024-03-02	14:42:54	1.10417	620
2024-03-02	14:52:54	1.11111	624
2024-03-02	15:02:54	1.11806	624
2024-03-02	15:12:54	1.125	617
2024-03-02	15:22:55	1.13194	626
2024-03-02	15:32:55	1.13889	628
2024-03-02	15:42:55	1.14583	620
2024-03-02	15:52:55	1.15278	619
2024-03-02	16:02:55	1.15972	622
2024-03-02	16:12:55	1.16667	622
2024-03-02	16:22:55	1.17361	623
2024-03-02	16:32:55	1.18056	622
2024-03-02	16:42:55	1.1875	625
2024-03-02	16:52:55	1.19444	626
2024-03-02	17:02:55	1.20139	623
2024-03-02	17:12:55	1.20833	621
2024-03-02	17:22:55	1.21528	630
2024-03-02	17:32:55	1.22222	627
2024-03-02	17:42:55	1.22917	626
2024-03-02	17:52:55	1.23611	623
2024-03-02	18:02:55	1.24306	625
2024-03-02	18:12:55	1.25	629
2024-03-02	18:22:55	1.25694	619
2024-03-02	18:32:55	1.26389	620
2024-03-02	18:42:55	1.27083	628
2024-03-02	18:52:55	1.27778	623
2024-03-02	19:02:55	1.28472	622
2024-03-02	19:12:55	1.29167	623
2024-03-02	19:22:55	1.29861	621
2024-03-02	19:32:55	1.30556	623
2024-03-02	19:42:55	1.3125	623
2024-03-02	19:52:55	1.31944	623
2024-03-02	20:02:55	1.32639	625
2024-03-02	20:12:55	1.33333	625
2024-03-02	20:22:55	1.34028	617
2024-03-02	20:32:55	1.34722	620
2024-03-02	20:42:55	1.35417	622
2024-03-02	20:52:55	1.36111	622
2024-03-02	21:02:55	1.36806	624
2024-03-02	21:12:55	1.375	623
2024-03-02	21:22:55	1.38194	619
2024-03-02	21:32:55	1.38889	621
2024-03-02	21:42:55	1.39583	622
2024-03-02	21:52:55	1.40278	624
2024-03-02	22:02:55	1.40972	627
2024-03-02	22:12:55	1.41667	622
2024-03-02	22:22:55	1.42361	622
2024-03-02	22:32:55	1.43056	625
2024-03-02	22:42:55	1.4375	624
2024-03-02	22:52:55	1.44444	626
2024-03-02	23:02:55	1.45139	628
2024-03-02	23:12:55	1.45833	633
2024-03-02	23:22:55	1.46528	628
2024-03-02	23:32:55	1.47222	629
2024-03-02	23:42:55	1.47917	631
2024-03-02	23:52:55	1.48611	631
2024-04-02	00:02:55	1.49306	625
2024-04-02	00:12:55	1.5	623
2024-04-02	00:22:55	1.50694	623
2024-04-02	00:32:55	1.51389	627
2024-04-02	00:42:56	1.52083	623
2024-04-02	00:52:56	1.52778	619
2024-04-02	01:02:56	1.53472	616
2024-04-02	01:12:56	1.54167	621
2024-04-02	01:22:56	1.54861	624
2024-04-02	01:32:56	1.55556	620
2024-04-02	01:42:56	1.5625	619
2024-04-02	01:52:56	1.56944	626
2024-04-02	02:02:56	1.57639	626
2024-04-02	02:12:56	1.58333	624
2024-04-02	02:22:56	1.59028	626
2024-04-02	02:32:56	1.59722	627
2024-04-02	02:42:56	1.60417	629
2024-04-02	02:52:56	1.61111	628
2024-04-02	03:02:56	1.61806	624
2024-04-02	03:12:56	1.625	627
2024-04-02	03:22:56	1.63194	622
2024-04-02	03:32:56	1.63889	623
2024-04-02	03:42:56	1.64583	623
2024-04-02	03:52:56	1.65278	624
2024-04-02	04:02:56	1.65972	625
2024-04-02	04:12:56	1.66667	625
2024-04-02	04:22:56	1.67361	626
2024-04-02	04:32:56	1.68056	626
2024-04-02	04:42:56	1.6875	626
2024-04-02	04:52:56	1.69444	626
2024-04-02	05:02:56	1.70139	626
2024-04-02	05:12:56	1.70833	626
2024-04-02	05:22:56	1.71528	627
2024-04-02	05:32:56	1.72222	622
2024-04-02	05:42:56	1.72917	631
2024-04-02	05:52:56	1.73611	626
2024-04-02	06:02:56	1.74306	621
2024-04-02	06:12:56	1.75	631
2024-04-02	06:22:56	1.75694	628
2024-04-02	06:32:56	1.76389	623
2024-04-02	06:42:56	1.77083	619
2024-04-02	06:52:56	1.77778	622
2024-04-02	07:02:56	1.78472	622
2024-04-02	07:12:56	1.79167	626
2024-04-02	07:22:56	1.79861	623
2024-04-02	07:32:56	1.80556	620
2024-04-02	07:42:56	1.8125	614
2024-04-02	07:52:56	1.81944	619
2024-04-02	08:02:56	1.82639	620
2024-04-02	08:12:56	1.83333	624
2024-04-02	08:22:56	1.84028	627
2024-04-02	08:32:56	1.84722	624
2024-04-02	08:42:56	1.85417	620
2024-04-02	08:52:56	1.86111	627
2024-04-02	09:02:56	1.86806	628
2024-04-02	09:12:56	1.875	623
2024-04-02	09:22:56	1.88194	617
2024-04-02	09:32:56	1.88889	624
2024-04-02	09:42:56	1.89583	621
2024-04-02	09:52:56	1.90278	621
2024-04-02	10:02:56	1.90972	622
2024-04-02	10:12:56	1.91667	627
2024-04-02	10:22:57	1.92361	621
2024-04-02	10:32:57	1.93056	618
2024-04-02	10:42:57	1.9375	620
2024-04-02	10:52:57	1.94444	624
2024-04-02	11:02:57	1.95139	618
2024-04-02	11:12:57	1.95833	624
2024-04-02	11:22:57	1.96528	623
2024-04-02	11:32:57	1.97222	623
2024-04-02	11:42:57	1.97917	621
2024-04-02	11:52:57	1.98611	622
2024-04-02	12:02:57	1.99306	622
2024-04-02	12:12:57	2	621
2024-04-02	12:22:57	2.00694	617
2024-04-02	12:32:57	2.01389	622
2024-04-02	12:42:57	2.02083	628
2024-04-02	12:52:57	2.02778	625
2024-04-02	13:02:57	2.03472	616
2024-04-02	13:12:57	2.04167	618
2024-04-02	13:22:57	2.04861	620
2024-04-02	13:32:57	2.05556	617
2024-04-02	13:42:57	2.0625	613
2024-04-02	13:52:57	2.06944	618
2024-04-02	14:02:57	2.07639	621
2024-04-02	14:12:57	2.08333	618
2024-04-02	14:22:57	2.09028	612
2024-04-02	14:32:57	2.09722	623
2024-04-02	14:42:57	2.10417	616
2024-04-02	14:52:57	2.11111	618
2024-04-02	15:02:57	2.11806	617
2024-04-02	15:12:57	2.125	618
2024-04-02	15:22:57	2.13194	622
2024-04-02	15:32:57	2.13889	611
2024-04-02	15:42:57	2.14583	622
2024-04-02	15:52:57	2.15278	620
2024-04-02	16:02:57	2.15972	623
2024-04-02	16:12:57	2.16667	619
2024-04-02	16:22:57	2.17361	617
2024-04-02	16:32:57	2.18056	624
2024-04-02	16:42:57	2.1875	618
2024-04-02	16:52:57	2.19444	622
2024-04-02	17:02:57	2.20139	616
2024-04-02	17:12:57	2.20833	615
2024-04-02	17:22:57	2.21528	624
2024-04-02	17:32:57	2.22222	618
2024-04-02	17:42:57	2.22917	621
2024-04-02	17:52:57	2.23611	626
2024-04-02	18:02:57	2.24306	623
2024-04-02	18:12:57	2.25	623
2024-04-02	18:22:57	2.25694	619
2024-04-02	18:32:57	2.26389	626
2024-04-02	18:42:57	2.27083	623
2024-04-02	18:52:57	2.27778	622
2024-04-02	19:02:57	2.28472	626
2024-04-02	19:12:57	2.29167	624
2024-04-02	19:22:57	2.29861	624
2024-04-02	19:32:57	2.30556	633
2024-04-02	19:42:58	2.3125	632
2024-04-02	19:52:58	2.31944	627
2024-04-02	20:02:58	2.32639	624
2024-04-02	20:12:58	2.33333	628
2024-04-02	20:22:58	2.34028	623
2024-04-02	20:32:58	2.34722	630
2024-04-02	20:42:58	2.35417	627
2024-04-02	20:52:58	2.36111	624
2024-04-02	21:02:58	2.36806	621
2024-04-02	21:12:58	2.375	623
2024-04-02	21:22:58	2.38194	626
2024-04-02	21:32:58	2.38889	625
2024-04-02	21:42:58	2.39583	629
2024-04-02	21:52:58	2.40278	636
2024-04-02	22:02:58	2.40972	633
2024-04-02	22:12:58	2.41667	636
2024-04-02	22:22:58	2.42361	627
2024-04-02	22:32:58	2.43056	632
2024-04-02	22:42:58	2.4375	631
2024-04-02	22:52:58	2.44444	633
2024-04-02	23:02:58	2.45139	629
2024-04-02	23:12:58	2.45833	632
2024-04-02	23:22:58	2.46528	627
2024-04-02	23:32:58	2.47222	625
2024-04-02	23:42:58	2.47917	631
2024-04-02	23:52:58	2.48611	626
2024-05-02	00:02:58	2.49306	635
2024-05-02	00:12:58	2.5	629
2024-05-02	00:22:58	2.50694	627
2024-05-02	00:32:58	2.51389	628
2024-05-02	00:42:58	2.52083	624
2024-05-02	00:52:58	2.52778	631
2024-05-02	01:02:58	2.53472	628
2024-05-02	01:12:58	2.54167	628
2024-05-02	01:22:58	2.54861	630
2024-05-02	01:32:58	2.55556	630
2024-05-02	01:42:58	2.5625	633
2024-05-02	01:52:58	2.56944	626
2024-05-02	02:02:58	2.57639	627
2024-05-02	02:12:58	2.58333	629
2024-05-02	02:22:58	2.59028	629
2024-05-02	02:32:58	2.59722	622
2024-05-02	02:42:58	2.60417	619
2024-05-02	02:52:58	2.61111	617
2024-05-02	03:02:58	2.61806	621
2024-05-02	03:12:58	2.625	627
2024-05-02	03:22:58	2.63194	625
2024-05-02	03:32:58	2.63889	628
2024-05-02	03:42:58	2.64583	627
2024-05-02	03:52:58	2.65278	618
2024-05-02	04:02:58	2.65972	625
2024-05-02	04:12:58	2.66667	619
2024-05-02	04:22:58	2.67361	625
2024-05-02	04:32:58	2.68056	618
2024-05-02	04:42:58	2.6875	612
2024-05-02	04:52:58	2.69444	619
2024-05-02	05:02:58	2.70139	623
2024-05-02	05:12:58	2.70833	626
2024-05-02	05:22:59	2.71528	620
2024-05-02	05:32:59	2.72222	617
2024-05-02	05:42:59	2.72917	617
2024-05-02	05:52:59	2.73611	627
2024-05-02	06:02:59	2.74306	620
2024-05-02	06:12:59	2.75	619
2024-05-02	06:22:59	2.75694	621
2024-05-02	06:32:59	2.76389	630
2024-05-02	06:42:59	2.77083	626
2024-05-02	06:52:59	2.77778	624
2024-05-02	07:02:59	2.78472	615
2024-05-02	07:12:59	2.79167	624
2024-05-02	07:22:59	2.79861	619
2024-05-02	07:32:59	2.80556	624
2024-05-02	07:42:59	2.8125	623
2024-05-02	07:52:59	2.81944	625
2024-05-02	08:02:59	2.82639	627
2024-05-02	08:12:59	2.83333	628
2024-05-02	08:22:59	2.84028	621
2024-05-02	08:32:59	2.84722	627		first injection
2024-05-02	08:42:59	2.85417	626
2024-05-02	08:52:59	2.86111	626
2024-05-02	09:02:59	2.86806	621
2024-05-02	09:12:59	2.875	623
2024-05-02	09:22:59	2.88194	625
2024-05-02	09:32:59	2.88889	622
2024-05-02	09:42:59	2.89583	624
2024-05-02	09:52:59	2.90278	620
2024-05-02	10:02:59	2.90972	625
2024-05-02	10:12:59	2.91667	631
2024-05-02	10:22:59	2.92361	640
2024-05-02	10:32:59	2.93056	636
2024-05-02	10:42:59	2.9375	630
2024-05-02	10:52:59	2.94444	627
2024-05-02	11:02:59	2.95139	633
2024-05-02	11:12:59	2.95833	636
2024-05-02	11:22:59	2.96528	631
2024-05-02	11:32:59	2.97222	633
2024-05-02	11:42:59	2.97917	631
2024-05-02	11:52:59	2.98611	638
2024-05-02	12:02:59	2.99306	628
2024-05-02	12:12:59	3	638
2024-05-02	12:22:59	3.00694	638
2024-05-02	12:32:59	3.01389	637
2024-05-02	12:42:59	3.02083	637
2024-05-02	12:52:59	3.02778	636
2024-05-02	13:02:59	3.03472	639
2024-05-02	13:12:59	3.04167	635
2024-05-02	13:22:59	3.04861	639
2024-05-02	13:32:59	3.05556	639
2024-05-02	13:42:59	3.0625	643
2024-05-02	13:52:59	3.06944	635
2024-05-02	14:02:59	3.07639	642
2024-05-02	14:12:59	3.08333	643
2024-05-02	14:22:59	3.09028	638
2024-05-02	14:32:59	3.09722	641
2024-05-02	14:42:59	3.10417	641
2024-05-02	14:52:59	3.11111	639
2024-05-02	15:02:59	3.11806	640
2024-05-02	15:13:00	3.125	642
2024-05-02	15:23:00	3.13194	639
2024-05-02	15:33:00	3.13889
2024-05-02	15:43:00	3.14583	645
2024-05-02	15:53:00	3.15278	647
2024-05-02	16:03:00	3.15972	646
2024-05-02	16:13:00	3.16667	639
2024-05-02	16:23:00	3.17361	635
2024-05-02	16:33:00	3.18056	636
2024-05-02	16:43:00	3.1875	637
2024-05-02	16:53:00	3.19444	631
2024-05-02	17:03:00	3.20139	642
2024-05-02	17:13:00	3.20833	646
2024-05-02	17:23:00	3.21528	644
2024-05-02	17:33:00	3.22222	645
2024-05-02	17:43:00	3.22917	641
2024-05-02	17:53:00	3.23611	641
2024-05-02	18:03:00	3.24306	649
2024-05-02	18:13:00	3.25	649
2024-05-02	18:23:00	3.25694	648
2024-05-02	18:33:00	3.26389	651
2024-05-02	18:43:00	3.27083	648
2024-05-02	18:53:00	3.27778	649
2024-05-02	19:03:00	3.28472	642
2024-05-02	19:13:00	3.29167	651
2024-05-02	19:23:00	3.29861	648
2024-05-02	19:33:00	3.30556	645
2024-05-02	19:43:00	3.3125	646
2024-05-02	19:53:00	3.31944	647
2024-05-02	20:03:00	3.32639	644
2024-05-02	20:13:00	3.33333	645
2024-05-02	20:23:00	3.34028	648
2024-05-02	20:33:00	3.34722	652
2024-05-02	20:43:00	3.35417	648
2024-05-02	20:53:00	3.36111	650
2024-05-02	21:03:00	3.36806	646
2024-05-02	21:13:00	3.375	647
2024-05-02	21:23:00	3.38194	650
2024-05-02	21:33:00	3.38889	653
2024-05-02	21:43:00	3.39583	658
2024-05-02	21:53:00	3.40278	649
2024-05-02	22:03:00	3.40972	648
2024-05-02	22:13:00	3.41667	643
2024-05-02	22:23:00	3.42361	647
2024-05-02	22:33:00	3.43056	651
2024-05-02	22:43:00	3.4375	651
2024-05-02	22:53:00	3.44444	649
2024-05-02	23:03:00	3.45139	646
2024-05-02	23:13:00	3.45833	643
2024-05-02	23:23:00	3.46528	654
2024-05-02	23:33:00	3.47222	651
2024-05-02	23:43:00	3.47917	657
2024-05-02	23:53:00	3.48611	657
2024-06-02	00:03:00	3.49306	656
2024-06-02	00:13:00	3.5	652
2024-06-02	00:23:01	3.50694	654
2024-06-02	00:33:01	3.51389	654
2024-06-02	00:43:01	3.52083	658
2024-06-02	00:53:01	3.52778	658
2024-06-02	01:03:01	3.53472	657
2024-06-02	01:13:01	3.54167	652
2024-06-02	01:23:01	3.54861	646
2024-06-02	01:33:01	3.55556	653
2024-06-02	01:43:01	3.5625	654
2024-06-02	01:53:01	3.56944	655
2024-06-02	02:03:01	3.57639	660
2024-06-02	02:13:01	3.58333	658
2024-06-02	02:23:01	3.59028	656
2024-06-02	02:33:01	3.59722	644
2024-06-02	02:43:01	3.60417	645
2024-06-02	02:53:01	3.61111	650
2024-06-02	03:03:01	3.61806	652
2024-06-02	03:13:01	3.625	643
2024-06-02	03:23:01	3.63194	653
2024-06-02	03:33:01	3.63889	650
2024-06-02	03:43:01	3.64583	647
2024-06-02	03:53:01	3.65278	645
2024-06-02	04:03:01	3.65972	641
2024-06-02	04:13:01	3.66667	640
2024-06-02	04:23:01	3.67361	644
2024-06-02	04:33:01	3.68056	650
2024-06-02	04:43:01	3.6875	650
2024-06-02	04:53:01	3.69444	654
2024-06-02	05:03:01	3.70139	649
2024-06-02	05:13:01	3.70833	651
2024-06-02	05:23:01	3.71528	648
2024-06-02	05:33:01	3.72222	642
2024-06-02	05:43:01	3.72917	648
2024-06-02	05:53:01	3.73611	650
2024-06-02	06:03:01	3.74306	652
2024-06-02	06:13:01	3.75	650
2024-06-02	06:23:01	3.75694	654
2024-06-02	06:33:01	3.76389	644
2024-06-02	06:43:01	3.77083	641
2024-06-02	06:53:01	3.77778	653
2024-06-02	07:03:01	3.78472	651
2024-06-02	07:13:01	3.79167	650
2024-06-02	07:23:01	3.79861	654
2024-06-02	07:33:01	3.80556	653
2024-06-02	07:43:01	3.8125	646
2024-06-02	07:53:01	3.81944	645
2024-06-02	08:03:01	3.82639	656
2024-06-02	08:13:01	3.83333	647
2024-06-02	08:23:01	3.84028	645
2024-06-02	08:33:01	3.84722	644
2024-06-02	08:43:01	3.85417	654
2024-06-02	08:53:01	3.86111	651
2024-06-02	09:03:01	3.86806	658
2024-06-02	09:13:01	3.875	662
2024-06-02	09:23:01	3.88194	651
2024-06-02	09:33:02	3.88889	647
2024-06-02	09:43:02	3.89583	648
2024-06-02	09:53:02	3.90278	647
2024-06-02	10:03:02	3.90972	651
2024-06-02	10:13:02	3.91667	653
2024-06-02	10:23:02	3.92361	653
2024-06-02	10:33:02	3.93056	647
2024-06-02	10:43:02	3.9375	647
2024-06-02	10:53:02	3.94444	645
2024-06-02	11:03:02	3.95139	651
2024-06-02	11:13:02	3.95833	654
2024-06-02	11:23:02	3.96528	641
2024-06-02	11:33:02	3.97222	647
2024-06-02	11:43:02	3.97917	648
2024-06-02	11:53:02	3.98611	654
2024-06-02	12:03:02	3.99306	652
2024-06-02	12:13:02	4	648
2024-06-02	12:23:02	4.00694	653
2024-06-02	12:33:02	4.01389	656
2024-06-02	12:43:02	4.02083	658
2024-06-02	12:53:02	4.02778	653
2024-06-02	13:03:02	4.03472	649
2024-06-02	13:13:02	4.04167	656
2024-06-02	13:23:02	4.04861	655
2024-06-02	13:33:02	4.05556	650
2024-06-02	13:43:02	4.0625	647
2024-06-02	13:53:02	4.06944	647
2024-06-02	14:03:02	4.07639	650
2024-06-02	14:13:02	4.08333	654
2024-06-02	14:23:02	4.09028	657
2024-06-02	14:33:02	4.09722	658
2024-06-02	14:43:02	4.10417	652
2024-06-02	14:53:02	4.11111	656
2024-06-02	15:03:02	4.11806	662
2024-06-02	15:13:02	4.125	664
2024-06-02	15:23:02	4.13194	661
2024-06-02	15:33:02	4.13889	661
2024-06-02	15:43:02	4.14583	652
2024-06-02	15:53:02	4.15278	657
2024-06-02	16:03:02	4.15972	653
2024-06-02	16:13:02	4.16667	657
2024-06-02	16:23:02	4.17361	644
2024-06-02	16:33:02	4.18056	648
2024-06-02	16:43:02	4.1875	658
2024-06-02	16:53:02	4.19444	660
2024-06-02	17:03:02	4.20139	656
2024-06-02	17:13:02	4.20833	656
2024-06-02	17:23:02	4.21528	658
2024-06-02	17:33:02	4.22222	656
2024-06-02	17:43:02	4.22917	657
2024-06-02	17:53:02	4.23611	649
2024-06-02	18:03:02	4.24306	656
2024-06-02	18:13:02	4.25	656
2024-06-02	18:23:02	4.25694	658
2024-06-02	18:33:02	4.26389	654
2024-06-02	18:43:02	4.27083	655
2024-06-02	18:53:02	4.27778	661
2024-06-02	19:03:02	4.28472	663
2024-06-02	19:13:02	4.29167	658
2024-06-02	19:23:02	4.29861	663
2024-06-02	19:33:02	4.30556	663
2024-06-02	19:43:02	4.3125	662
2024-06-02	19:53:03	4.31944	647
2024-06-02	20:03:03	4.32639	652
2024-06-02	20:13:03	4.33333	656
2024-06-02	20:23:03	4.34028	651
2024-06-02	20:33:03	4.34722	656
2024-06-02	20:43:03	4.35417	658
2024-06-02	20:53:03	4.36111	661
2024-06-02	21:03:03	4.36806	653
2024-06-02	21:13:03	4.375	655
2024-06-02	21:23:03	4.38194	657
2024-06-02	21:33:03	4.38889	656
2024-06-02	21:43:03	4.39583	660
2024-06-02	21:53:03	4.40278	646
2024-06-02	22:03:03	4.40972	649
2024-06-02	22:13:03	4.41667	659
2024-06-02	22:23:03	4.42361	656
2024-06-02	22:33:03	4.43056	665
2024-06-02	22:43:03	4.4375	668
2024-06-02	22:53:03	4.44444	661
2024-06-02	23:03:03	4.45139	660
2024-06-02	23:13:03	4.45833	661
2024-06-02	23:23:03	4.46528	658
2024-06-02	23:33:03	4.47222	661
2024-06-02	23:43:03	4.47917	662
2024-06-02	23:53:03	4.48611	657
2024-07-02	00:03:03	4.49306	659
2024-07-02	00:13:03	4.5	657
2024-07-02	00:23:03	4.50694	658
2024-07-02	00:33:03	4.51389	660
2024-07-02	00:43:03	4.52083	666
2024-07-02	00:53:03	4.52778	664
2024-07-02	01:03:03	4.53472	662
2024-07-02	01:13:03	4.54167	662
2024-07-02	01:23:03	4.54861	659
2024-07-02	01:33:03	4.55556	659
2024-07-02	01:43:03	4.5625	663
2024-07-02	01:53:03	4.56944	659
2024-07-02	02:03:03	4.57639	655
2024-07-02	02:13:03	4.58333	660
2024-07-02	02:23:03	4.59028	658
2024-07-02	02:33:03	4.59722	662
2024-07-02	02:43:03	4.60417	661
2024-07-02	02:53:03	4.61111	664
2024-07-02	03:03:03	4.61806	661
2024-07-02	03:13:03	4.625	659
2024-07-02	03:23:03	4.63194	662
2024-07-02	03:33:03	4.63889	660
2024-07-02	03:43:04	4.64583	657
2024-07-02	03:53:04	4.65278	660
2024-07-02	04:03:04	4.65972	664
2024-07-02	04:13:04	4.66667	660
2024-07-02	04:23:04	4.67361	667
2024-07-02	04:33:04	4.68056	658
2024-07-02	04:43:04	4.6875	656
2024-07-02	04:53:04	4.69444	656
2024-07-02	05:03:04	4.70139	656
2024-07-02	05:13:04	4.70833	664
2024-07-02	05:23:04	4.71528	649
2024-07-02	05:33:04	4.72222	654
2024-07-02	05:43:04	4.72917	654
2024-07-02	05:53:04	4.73611	653
2024-07-02	06:03:04	4.74306	647
2024-07-02	06:13:04	4.75	650
2024-07-02	06:23:04	4.75694	658
2024-07-02	06:33:04	4.76389	657
2024-07-02	06:43:04	4.77083	660
2024-07-02	06:53:04	4.77778	652
2024-07-02	07:03:04	4.78472	654
2024-07-02	07:13:04	4.79167	649
2024-07-02	07:23:04	4.79861	648
2024-07-02	07:33:04	4.80556	649
2024-07-02	07:43:04	4.8125	650
2024-07-02	07:53:04	4.81944	650
2024-07-02	08:03:04	4.82639	653
2024-07-02	08:13:04	4.83333	651
2024-07-02	08:23:04	4.84028	655
2024-07-02	08:33:04	4.84722	642
2024-07-02	08:43:04	4.85417	653
2024-07-02	08:53:04	4.86111	655
2024-07-02	09:03:04	4.86806	661
2024-07-02	09:13:04	4.875	655
2024-07-02	09:23:04	4.88194	663
2024-07-02	09:33:04	4.88889	655
2024-07-02	09:43:04	4.89583	659
2024-07-02	09:53:04	4.90278	655
2024-07-02	10:03:04	4.90972	655
2024-07-02	10:13:04	4.91667	657
2024-07-02	10:23:04	4.92361	654
2024-07-02	10:33:04	4.93056	654
2024-07-02	10:43:04	4.9375	660
2024-07-02	10:53:04	4.94444	649
2024-07-02	11:03:04	4.95139	648
2024-07-02	11:13:04	4.95833	656
2024-07-02	11:23:04	4.96528	661
2024-07-02	11:33:04	4.97222	651
2024-07-02	11:43:04	4.97917	654
2024-07-02	11:53:04	4.98611	660
2024-07-02	12:03:04	4.99306	652
2024-07-02	12:13:04	5	653
2024-07-02	12:23:04	5.00694	655
2024-07-02	12:33:04	5.01389	651
2024-07-02	12:43:04	5.02083	651
2024-07-02	12:53:05	5.02778	652
2024-07-02	13:03:05	5.03472	659
2024-07-02	13:13:05	5.04167	652
2024-07-02	13:23:05	5.04861	651
2024-07-02	13:33:05	5.05556	658
2024-07-02	13:43:05	5.0625	659
2024-07-02	13:53:05	5.06944	661
2024-07-02	14:03:05	5.07639	662
2024-07-02	14:13:05	5.08333	656
2024-07-02	14:23:05	5.09028	653
2024-07-02	14:33:05	5.09722	653
2024-07-02	14:43:05	5.10417	652
2024-07-02	14:53:05	5.11111	656
2024-07-02	15:03:05	5.11806	655
2024-07-02	15:13:05	5.125	655
2024-07-02	15:23:05	5.13194	660
2024-07-02	15:33:05	5.13889	659
2024-07-02	15:43:05	5.14583	656
2024-07-02	15:53:05	5.15278	652
2024-07-02	16:03:05	5.15972	651
2024-07-02	16:13:05	5.16667	656
2024-07-02	16:23:05	5.17361	657
2024-07-02	16:33:05	5.18056	658
2024-07-02	16:43:05	5.1875	651
2024-07-02	16:53:05	5.19444	650
2024-07-02	17:03:05	5.20139	650
2024-07-02	17:13:05	5.20833	649
2024-07-02	17:23:05	5.21528	647
2024-07-02	17:33:05	5.22222	655
2024-07-02	17:43:05	5.22917	652
2024-07-02	17:53:05	5.23611	658
2024-07-02	18:03:05	5.24306	651
2024-07-02	18:13:05	5.25	650
2024-07-02	18:23:05	5.25694	649
2024-07-02	18:33:05	5.26389	653
2024-07-02	18:43:05	5.27083	657
2024-07-02	18:53:05	5.27778	654
2024-07-02	19:03:05	5.28472	651
2024-07-02	19:13:05	5.29167	651
2024-07-02	19:23:05	5.29861	650
2024-07-02	19:33:05	5.30556	656
2024-07-02	19:43:05	5.3125	657
2024-07-02	19:53:05	5.31944	664
2024-07-02	20:03:05	5.32639	651
2024-07-02	20:13:05	5.33333	653
2024-07-02	20:23:05	5.34028	651
2024-07-02	20:33:05	5.34722	659
2024-07-02	20:43:05	5.35417	656
2024-07-02	20:53:05	5.36111	650
2024-07-02	21:03:05	5.36806	649
2024-07-02	21:13:05	5.375	647
2024-07-02	21:23:05	5.38194	650
2024-07-02	21:33:05	5.38889	651
2024-07-02	21:43:05	5.39583	653
2024-07-02	21:53:05	5.40278	660
2024-07-02	22:03:06	5.40972	660
2024-07-02	22:13:06	5.41667	656
2024-07-02	22:23:06	5.42361	652
2024-07-02	22:33:06	5.43056	658
2024-07-02	22:43:06	5.4375	655
2024-07-02	22:53:06	5.44444	662
2024-07-02	23:03:06	5.45139	660
2024-07-02	23:13:06	5.45833	658
2024-07-02	23:23:06	5.46528	663
2024-07-02	23:33:06	5.47222	660
2024-07-02	23:43:06	5.47917	662
2024-07-02	23:53:06	5.48611	659
2024-08-02	00:03:06	5.49306	650
2024-08-02	00:13:06	5.5	655
2024-08-02	00:23:06	5.50694	650
2024-08-02	00:33:06	5.51389	653
2024-08-02	00:43:06	5.52083	648
2024-08-02	00:53:06	5.52778	649
2024-08-02	01:03:06	5.53472	645
2024-08-02	01:13:06	5.54167	652
2024-08-02	01:23:06	5.54861	651
2024-08-02	01:33:06	5.55556	652
2024-08-02	01:43:06	5.5625	646
2024-08-02	01:53:06	5.56944	646
2024-08-02	02:03:06	5.57639	648
2024-08-02	02:13:06	5.58333	650
2024-08-02	02:23:06	5.59028	639
2024-08-02	02:33:06	5.59722	638
2024-08-02	02:43:06	5.60417	638
2024-08-02	02:53:06	5.61111	639
2024-08-02	03:03:06	5.61806	642
2024-08-02	03:13:06	5.625	641
2024-08-02	03:23:06	5.63194	641
2024-08-02	03:33:06	5.63889	646
2024-08-02	03:43:06	5.64583	647
2024-08-02	03:53:06	5.65278	648
2024-08-02	04:03:06	5.65972	645
2024-08-02	04:13:06	5.66667	650
2024-08-02	04:23:06	5.67361	647
2024-08-02	04:33:06	5.68056	651
2024-08-02	04:43:06	5.6875	647
2024-08-02	04:53:06	5.69444	649
2024-08-02	05:03:06	5.70139	647
2024-08-02	05:13:06	5.70833	647
2024-08-02	05:23:06	5.71528	648
2024-08-02	05:33:06	5.72222	650
2024-08-02	05:43:06	5.72917	648
2024-08-02	05:53:06	5.73611	648
2024-08-02	06:03:06	5.74306	643
2024-08-02	06:13:06	5.75	646
2024-08-02	06:23:06	5.75694	647
2024-08-02	06:33:06	5.76389	639
2024-08-02	06:43:06	5.77083	645
2024-08-02	06:53:06	5.77778	647
2024-08-02	07:03:07	5.78472	644
2024-08-02	07:13:07	5.79167	644
2024-08-02	07:23:07	5.79861	638
2024-08-02	07:33:07	5.80556	644
2024-08-02	07:43:07	5.8125	648
2024-08-02	07:53:07	5.81944	648
2024-08-02	08:03:07	5.82639	652
2024-08-02	08:13:07	5.83333	654
2024-08-02	08:23:07	5.84028	636
2024-08-02	08:33:07	5.84722	638
2024-08-02	08:43:07	5.85417	646
2024-08-02	08:53:07	5.86111	644
2024-08-02	09:03:07	5.86806	647
2024-08-02	09:13:07	5.875	653
2024-08-02	09:23:07	5.88194	651
2024-08-02	09:33:07	5.88889	658
2024-08-02	09:43:07	5.89583	651
2024-08-02	09:53:07	5.90278	648
2024-08-02	10:03:07	5.90972	653
2024-08-02	10:13:07	5.91667	648
2024-08-02	10:23:07	5.92361	653
2024-08-02	10:33:07	5.93056	645
2024-08-02	10:43:07	5.9375	647
2024-08-02	10:53:07	5.94444	647
2024-08-02	11:03:07	5.95139	651
2024-08-02	11:13:07	5.95833	653
2024-08-02	11:23:07	5.96528	650
2024-08-02	11:33:07	5.97222	645
2024-08-02	11:43:07	5.97917	648
2024-08-02	11:53:07	5.98611	654
2024-08-02	12:03:07	5.99306	650
2024-08-02	12:13:07	6	657
2024-08-02	12:23:07	6.00694	660
2024-08-02	12:33:07	6.01389	657
2024-08-02	12:43:07	6.02083	663
2024-08-02	12:53:07	6.02778	657
2024-08-02	13:03:07	6.03472	658
2024-08-02	13:13:07	6.04167	659
2024-08-02	13:23:07	6.04861	658
2024-08-02	13:33:07	6.05556	660
2024-08-02	13:43:07	6.0625	662
2024-08-02	13:53:07	6.06944	653
2024-08-02	14:03:07	6.07639	656
2024-08-02	14:13:07	6.08333	656
2024-08-02	14:23:07	6.09028	660
2024-08-02	14:33:07	6.09722	657
2024-08-02	14:43:07	6.10417	660
2024-08-02	14:53:07	6.11111	654
2024-08-02	15:03:07	6.11806	657
2024-08-02	15:13:07	6.125	659
2024-08-02	15:23:07	6.13194	658
2024-08-02	15:33:07	6.13889	661
2024-08-02	15:43:07	6.14583	652
2024-08-02	15:53:08	6.15278	656
2024-08-02	16:03:08	6.15972	658
2024-08-02	16:13:08	6.16667	665
2024-08-02	16:23:08	6.17361	660
2024-08-02	16:33:08	6.18056	658
2024-08-02	16:43:08	6.1875	655
2024-08-02	16:53:08	6.19444	650
2024-08-02	17:03:08	6.20139	654
2024-08-02	17:13:08	6.20833	657
2024-08-02	17:23:08	6.21528	660
2024-08-02	17:33:08	6.22222	658
2024-08-02	17:43:08	6.22917	656
2024-08-02	17:53:08	6.23611	664
2024-08-02	18:03:08	6.24306	666
2024-08-02	18:13:08	6.25	671
2024-08-02	18:23:08	6.25694	666
2024-08-02	18:33:08	6.26389	666
2024-08-02	18:43:08	6.27083	670
2024-08-02	18:53:08	6.27778	662
2024-08-02	19:03:08	6.28472	666
2024-08-02	19:13:08	6.29167	662
2024-08-02	19:23:08	6.29861	661
2024-08-02	19:33:08	6.30556	661
2024-08-02	19:43:08	6.3125	663
2024-08-02	19:53:08	6.31944	661
2024-08-02	20:03:08	6.32639	665
2024-08-02	20:13:08	6.33333	664
2024-08-02	20:23:08	6.34028	663
2024-08-02	20:33:08	6.34722	664
2024-08-02	20:43:08	6.35417	655
2024-08-02	20:53:08	6.36111	658
2024-08-02	21:03:08	6.36806	656
2024-08-02	21:13:08	6.375	658
2024-08-02	21:23:08	6.38194	659
2024-08-02	21:33:08	6.38889	656
2024-08-02	21:43:08	6.39583	654
2024-08-02	21:53:08	6.40278	663
2024-08-02	22:03:08	6.40972	650
2024-08-02	22:13:08	6.41667	653
2024-08-02	22:23:08	6.42361	659
2024-08-02	22:33:08	6.43056	658
2024-08-02	22:43:08	6.4375	659
2024-08-02	22:53:08	6.44444	660
2024-08-02	23:03:08	6.45139	655
2024-08-02	23:13:08	6.45833	655
2024-08-02	23:23:08	6.46528	660
2024-08-02	23:33:08	6.47222	657
2024-08-02	23:43:08	6.47917	656
2024-08-02	23:53:08	6.48611	666
2024-09-02	00:03:08	6.49306	656
2024-09-02	00:13:08	6.5	660
2024-09-02	00:23:08	6.50694	657
2024-09-02	00:33:08	6.51389	655
2024-09-02	00:43:08	6.52083	659
2024-09-02	00:53:08	6.52778	652
2024-09-02	01:03:09	6.53472	654
2024-09-02	01:13:09	6.54167	659
2024-09-02	01:23:09	6.54861	655
2024-09-02	01:33:09	6.55556	661
2024-09-02	01:43:09	6.5625	653
2024-09-02	01:53:09	6.56944	651
2024-09-02	02:03:09	6.57639	650
2024-09-02	02:13:09	6.58333	650
2024-09-02	02:23:09	6.59028	645
2024-09-02	02:33:09	6.59722	655
2024-09-02	02:43:09	6.60417	654
2024-09-02	02:53:09	6.61111	652
2024-09-02	03:03:09	6.61806	647
2024-09-02	03:13:09	6.625	655
2024-09-02	03:23:09	6.63194	656
2024-09-02	03:33:09	6.63889	658
2024-09-02	03:43:09	6.64583	659
2024-09-02	03:53:09	6.65278	654
2024-09-02	04:03:09	6.65972	647
2024-09-02	04:13:09	6.66667	653
2024-09-02	04:23:09	6.67361	653
2024-09-02	04:33:09	6.68056	654
2024-09-02	04:43:09	6.6875	650
2024-09-02	04:53:09	6.69444	652
2024-09-02	05:03:09	6.70139	646
2024-09-02	05:13:09	6.70833	648
2024-09-02	05:23:09	6.71528	647
2024-09-02	05:33:09	6.72222	657
2024-09-02	05:43:09	6.72917	661
2024-09-02	05:53:09	6.73611	651
2024-09-02	06:03:09	6.74306	649
2024-09-02	06:13:09	6.75	646
2024-09-02	06:23:09	6.75694	640
2024-09-02	06:33:09	6.76389	648
2024-09-02	06:43:09	6.77083	650
2024-09-02	06:53:09	6.77778	653
2024-09-02	07:03:09	6.78472	652
2024-09-02	07:13:09	6.79167	650
2024-09-02	07:23:09	6.79861	653
2024-09-02	07:33:09	6.80556	652
2024-09-02	07:43:09	6.8125	645
2024-09-02	07:53:09	6.81944	645
2024-09-02	08:03:09	6.82639	643
2024-09-02	08:13:09	6.83333	648
2024-09-02	08:23:09	6.84028	645
2024-09-02	08:33:09	6.84722	646
2024-09-02	08:43:09	6.85417	649
2024-09-02	08:53:09	6.86111	650
2024-09-02	09:03:09	6.86806	652
2024-09-02	09:13:09	6.875	652
2024-09-02	09:23:09	6.88194	646
2024-09-02	09:33:09	6.88889	645
2024-09-02	09:43:09	6.89583	644
2024-09-02	09:53:09	6.90278	644
2024-09-02	10:03:10	6.90972	641
2024-09-02	10:13:10	6.91667	645
2024-09-02	10:23:10	6.92361	640
2024-09-02	10:33:10	6.93056	638
2024-09-02	10:43:10	6.9375	644
2024-09-02	10:53:10	6.94444	636
2024-09-02	11:03:10	6.95139	646
2024-09-02	11:13:10	6.95833	645
2024-09-02	11:23:10	6.96528	646
2024-09-02	11:33:10	6.97222	642
2024-09-02	11:43:10	6.97917	646
2024-09-02	11:53:10	6.98611	649
2024-09-02	12:03:10	6.99306	651
2024-09-02	12:13:10	7	645
2024-09-02	12:23:10	7.00694	645
2024-09-02	12:33:10	7.01389	643
2024-09-02	12:43:10	7.02083	649
2024-09-02	12:53:10	7.02778	642
2024-09-02	13:03:10	7.03472	647
2024-09-02	13:13:10	7.04167	641
2024-09-02	13:23:10	7.04861	642
2024-09-02	13:33:10	7.05556	642
2024-09-02	13:43:10	7.0625	648
2024-09-02	13:53:10	7.06944	648
2024-09-02	14:03:10	7.07639	649
2024-09-02	14:13:10	7.08333	642
2024-09-02	14:23:10	7.09028	636
2024-09-02	14:33:10	7.09722	635
2024-09-02	14:43:10	7.10417	641
2024-09-02	14:53:10	7.11111	646
2024-09-02	15:03:10	7.11806	643
2024-09-02	15:13:10	7.125	648
2024-09-02	15:23:10	7.13194	641
2024-09-02	15:33:10	7.13889	641
2024-09-02	15:43:10	7.14583	647
2024-09-02	15:53:10	7.15278	644
2024-09-02	16:03:10	7.15972	649
2024-09-02	16:13:10	7.16667	651
2024-09-02	16:23:10	7.17361	655
2024-09-02	16:33:10	7.18056	647
2024-09-02	16:43:10	7.1875	641
2024-09-02	16:53:10	7.19444	650
2024-09-02	17:03:10	7.20139	648
2024-09-02	17:13:10	7.20833	641
2024-09-02	17:23:10	7.21528	649
2024-09-02	17:33:10	7.22222	646
2024-09-02	17:43:10	7.22917	647
2024-09-02	17:53:10	7.23611	649
2024-09-02	18:03:10	7.24306	647
2024-09-02	18:13:10	7.25	655
2024-09-02	18:23:10	7.25694	650
2024-09-02	18:33:10	7.26389	648
2024-09-02	18:43:10	7.27083	652
2024-09-02	18:53:10	7.27778	652
2024-09-02	19:03:10	7.28472	646
2024-09-02	19:13:11	7.29167	650
2024-09-02	19:23:11	7.29861	650
2024-09-02	19:33:11	7.30556	646
2024-09-02	19:43:11	7.3125	651
2024-09-02	19:53:11	7.31944	648
2024-09-02	20:03:11	7.32639	646
2024-09-02	20:13:11	7.33333	655
2024-09-02	20:23:11	7.34028	643
2024-09-02	20:33:11	7.34722	643
2024-09-02	20:43:11	7.35417	646
2024-09-02	20:53:11	7.36111	648
2024-09-02	21:03:11	7.36806	643
2024-09-02	21:13:11	7.375	646
2024-09-02	21:23:11	7.38194	645
2024-09-02	21:33:11	7.38889	649
2024-09-02	21:43:11	7.39583	647
2024-09-02	21:53:11	7.40278	648
2024-09-02	22:03:11	7.40972	647
2024-09-02	22:13:11	7.41667	649
2024-09-02	22:23:11	7.42361	649
2024-09-02	22:33:11	7.43056	642
2024-09-02	22:43:11	7.4375	642
2024-09-02	22:53:11	7.44444	644
2024-09-02	23:03:11	7.45139	651
2024-09-02	23:13:11	7.45833	649
2024-09-02	23:23:11	7.46528	643
2024-09-02	23:33:11	7.47222	645
2024-09-02	23:43:11	7.47917	638
2024-09-02	23:53:11	7.48611	646
2024-10-02	00:03:11	7.49306	641
2024-10-02	00:13:11	7.5	646
2024-10-02	00:23:11	7.50694	639
2024-10-02	00:33:11	7.51389	649
2024-10-02	00:43:11	7.52083	646
2024-10-02	00:53:11	7.52778	646
2024-10-02	01:03:11	7.53472	641
2024-10-02	01:13:11	7.54167	641
2024-10-02	01:23:11	7.54861	648
2024-10-02	01:33:11	7.55556	647
2024-10-02	01:43:11	7.5625	653
2024-10-02	01:53:11	7.56944	647
2024-10-02	02:03:11	7.57639	649
2024-10-02	02:13:11	7.58333	641
2024-10-02	02:23:11	7.59028	639
2024-10-02	02:33:11	7.59722	642
2024-10-02	02:43:11	7.60417	641
2024-10-02	02:53:11	7.61111	646
2024-10-02	03:03:11	7.61806	640
2024-10-02	03:13:11	7.625	641
2024-10-02	03:23:11	7.63194	640
2024-10-02	03:33:11	7.63889	644
2024-10-02	03:43:11	7.64583	647
2024-10-02	03:53:11	7.65278	644
2024-10-02	04:03:11	7.65972	641
2024-10-02	04:13:11	7.66667	645
2024-10-02	04:23:12	7.67361	647
2024-10-02	04:33:12	7.68056	648
2024-10-02	04:43:12	7.6875	647
2024-10-02	04:53:12	7.69444	652
2024-10-02	05:03:12	7.70139	648
2024-10-02	05:13:12	7.70833	646
2024-10-02	05:23:12	7.71528	654
2024-10-02	05:33:12	7.72222	645
2024-10-02	05:43:12	7.72917	645
2024-10-02	05:53:12	7.73611	649
2024-10-02	06:03:12	7.74306	649
2024-10-02	06:13:12	7.75	650
2024-10-02	06:23:12	7.75694	656
2024-10-02	06:33:12	7.76389	647
2024-10-02	06:43:12	7.77083	654
2024-10-02	06:53:12	7.77778	643
2024-10-02	07:03:12	7.78472	647
2024-10-02	07:13:12	7.79167	643
2024-10-02	07:23:12	7.79861	642
2024-10-02	07:33:12	7.80556	646
2024-10-02	07:43:12	7.8125	649
2024-10-02	07:53:12	7.81944	645
2024-10-02	08:03:12	7.82639	642
2024-10-02	08:13:12	7.83333	645
2024-10-02	08:23:12	7.84028	647
2024-10-02	08:33:12	7.84722	645
2024-10-02	08:43:12	7.85417	642
2024-10-02	08:53:12	7.86111	643
2024-10-02	09:03:12	7.86806	642
2024-10-02	09:13:12	7.875	642
2024-10-02	09:23:12	7.88194	647
2024-10-02	09:33:12	7.88889	648
2024-10-02	09:43:12	7.89583	644
2024-10-02	09:53:12	7.90278	648
2024-10-02	10:03:12	7.90972	644
2024-10-02	10:13:12	7.91667	644
2024-10-02	10:23:12	7.92361	642
2024-10-02	10:33:12	7.93056	642
2024-10-02	10:43:12	7.9375	640
2024-10-02	10:53:12	7.94444	648
2024-10-02	11:03:12	7.95139	649
2024-10-02	11:13:12	7.95833	646
2024-10-02	11:23:12	7.96528	641
2024-10-02	11:33:12	7.97222	648
2024-10-02	11:43:12	7.97917	641
2024-10-02	11:53:12	7.98611	644
2024-10-02	12:03:12	7.99306	646
2024-10-02	12:13:12	8	649
2024-10-02	12:23:12	8.00694	643
2024-10-02	12:33:12	8.01389	652
2024-10-02	12:43:12	8.02083	648
2024-10-02	12:53:12	8.02778	647
2024-10-02	13:03:12	8.03472	646
2024-10-02	13:13:12	8.04167	647
2024-10-02	13:23:13	8.04861	644
2024-10-02	13:33:13	8.05556	642
2024-10-02	13:43:13	8.0625	641
2024-10-02	13:53:13	8.06944	645
2024-10-02	14:03:13	8.07639	648
2024-10-02	14:13:13	8.08333	651
2024-10-02	14:23:13	8.09028	647
2024-10-02	14:33:13	8.09722	649
2024-10-02	14:43:13	8.10417	646
2024-10-02	14:53:13	8.11111	647
2024-10-02	15:03:13	8.11806	639
2024-10-02	15:13:13	8.125	638
2024-10-02	15:23:13	8.13194	645
2024-10-02	15:33:13	8.13889	648
2024-10-02	15:43:13	8.14583	648
2024-10-02	15:53:13	8.15278	643
2024-10-02	16:03:13	8.15972	642
2024-10-02	16:13:13	8.16667	645
2024-10-02	16:23:13	8.17361	641
2024-10-02	16:33:13	8.18056	637
2024-10-02	16:43:13	8.1875	638
2024-10-02	16:53:13	8.19444	642
2024-10-02	17:03:13	8.20139	637
2024-10-02	17:13:13	8.20833	636
2024-10-02	17:23:13	8.21528	639
2024-10-02	17:33:13	8.22222	638
2024-10-02	17:43:13	8.22917	641
2024-10-02	17:53:13	8.23611	638
2024-10-02	18:03:13	8.24306	636
2024-10-02	18:13:13	8.25	643
2024-10-02	18:23:13	8.25694	641
2024-10-02	18:33:13	8.26389	630
2024-10-02	18:43:13	8.27083	638
2024-10-02	18:53:13	8.27778	635
2024-10-02	19:03:13	8.28472	642
2024-10-02	19:13:13	8.29167	640
2024-10-02	19:23:13	8.29861	645
2024-10-02	19:33:13	8.30556	638
2024-10-02	19:43:13	8.3125	633
2024-10-02	19:53:13	8.31944	633
2024-10-02	20:03:13	8.32639	638
2024-10-02	20:13:13	8.33333	639
2024-10-02	20:23:13	8.34028	639
2024-10-02	20:33:13	8.34722	642
2024-10-02	20:43:13	8.35417	647
2024-10-02	20:53:13	8.36111	641
2024-10-02	21:03:13	8.36806	641
2024-10-02	21:13:13	8.375	637
2024-10-02	21:23:13	8.38194	638
2024-10-02	21:33:13	8.38889	642
2024-10-02	21:43:13	8.39583	635
2024-10-02	21:53:13	8.40278	635
2024-10-02	22:03:13	8.40972	638
2024-10-02	22:13:13	8.41667	641
2024-10-02	22:23:14	8.42361	639
2024-10-02	22:33:14	8.43056	633
2024-10-02	22:43:14	8.4375	635
2024-10-02	22:53:14	8.44444	634
2024-10-02	23:03:14	8.45139	632
2024-10-02	23:13:14	8.45833	636
2024-10-02	23:23:14	8.46528	626
2024-10-02	23:33:14	8.47222	629
2024-10-02	23:43:14	8.47917	639
2024-10-02	23:53:14	8.48611	635
2024-11-02	00:03:14	8.49306	633
2024-11-02	00:13:14	8.5	636
2024-11-02	00:23:14	8.50694	636
2024-11-02	00:33:14	8.51389	642
2024-11-02	00:43:14	8.52083	643
2024-11-02	00:53:14	8.52778	643
2024-11-02	01:03:14	8.53472	640
2024-11-02	01:13:14	8.54167	638
2024-11-02	01:23:14	8.54861	636
2024-11-02	01:33:14	8.55556	637
2024-11-02	01:43:14	8.5625	639
2024-11-02	01:53:14	8.56944	632
2024-11-02	02:03:14	8.57639	638
2024-11-02	02:13:14	8.58333	635
2024-11-02	02:23:14	8.59028	632
2024-11-02	02:33:14	8.59722	630
2024-11-02	02:43:14	8.60417	636
2024-11-02	02:53:14	8.61111	638
2024-11-02	03:03:14	8.61806	642
2024-11-02	03:13:14	8.625	639
2024-11-02	03:23:14	8.63194	637
2024-11-02	03:33:14	8.63889	639
2024-11-02	03:43:14	8.64583	644
2024-11-02	03:53:14	8.65278	643
2024-11-02	04:03:14	8.65972	639
2024-11-02	04:13:14	8.66667	640
2024-11-02	04:23:14	8.67361	646
2024-11-02	04:33:14	8.68056	643
2024-11-02	04:43:14	8.6875	640
2024-11-02	04:53:14	8.69444	632
2024-11-02	05:03:14	8.70139	632
2024-11-02	05:13:14	8.70833	640
2024-11-02	05:23:14	8.71528	637
2024-11-02	05:33:14	8.72222	635
2024-11-02	05:43:14	8.72917	635
2024-11-02	05:53:14	8.73611	632
2024-11-02	06:03:14	8.74306	629
2024-11-02	06:13:14	8.75	627
2024-11-02	06:23:14	8.75694	623
2024-11-02	06:33:14	8.76389	625
2024-11-02	06:43:14	8.77083	631
2024-11-02	06:53:14	8.77778	631
2024-11-02	07:03:14	8.78472	623
2024-11-02	07:13:14	8.79167	630
2024-11-02	07:23:14	8.79861	626
2024-11-02	07:33:14	8.80556	629
2024-11-02	07:43:15	8.8125	633
2024-11-02	07:53:15	8.81944	631
2024-11-02	08:03:15	8.82639	630
2024-11-02	08:13:15	8.83333	628
2024-11-02	08:23:15	8.84028	634
2024-11-02	08:33:15	8.84722	641
2024-11-02	08:43:15	8.85417	645
2024-11-02	08:53:15	8.86111	638
2024-11-02	09:03:15	8.86806	634
2024-11-02	09:13:15	8.875	632
2024-11-02	09:23:15	8.88194	639
2024-11-02	09:33:15	8.88889	637
2024-11-02	09:43:15	8.89583	640
2024-11-02	09:53:15	8.90278	637
2024-11-02	10:03:15	8.90972	629
2024-11-02	10:13:15	8.91667	638
2024-11-02	10:23:15	8.92361	639
2024-11-02	10:33:15	8.93056	634
2024-11-02	10:43:15	8.9375	635
2024-11-02	10:53:15	8.94444	632
2024-11-02	11:03:15	8.95139	638
2024-11-02	11:13:15	8.95833	636
2024-11-02	11:23:15	8.96528	637
2024-11-02	11:33:15	8.97222	644
2024-11-02	11:43:15	8.97917	638
2024-11-02	11:53:15	8.98611	643
2024-11-02	12:03:15	8.99306	637
2024-11-02	12:13:15	9	642
2024-11-02	12:23:15	9.00694	637
2024-11-02	12:33:15	9.01389	639
2024-11-02	12:43:15	9.02083	642
2024-11-02	12:53:15	9.02778	638
2024-11-02	13:03:15	9.03472	638
2024-11-02	13:13:15	9.04167	640
2024-11-02	13:23:15	9.04861	638
2024-11-02	13:33:15	9.05556	644
2024-11-02	13:43:15	9.0625	642
2024-11-02	13:53:15	9.06944	641
2024-11-02	14:03:15	9.07639	641
2024-11-02	14:13:15	9.08333	640
2024-11-02	14:23:15	9.09028	634
2024-11-02	14:33:15	9.09722	635
2024-11-02	14:43:15	9.10417	639
2024-11-02	14:53:15	9.11111	640
2024-11-02	15:03:15	9.11806	640
2024-11-02	15:13:15	9.125	638
2024-11-02	15:23:15	9.13194	632
2024-11-02	15:33:15	9.13889	638
2024-11-02	15:43:15	9.14583	638
2024-11-02	15:53:15	9.15278	638
2024-11-02	16:03:15	9.15972	634
2024-11-02	16:13:15	9.16667	639
2024-11-02	16:23:15	9.17361	633
2024-11-02	16:33:15	9.18056	635
2024-11-02	16:43:15	9.1875	635
2024-11-02	16:53:16	9.19444	637
2024-11-02	17:03:16	9.20139	638
2024-11-02	17:13:16	9.20833	639
2024-11-02	17:23:16	9.21528	629
2024-11-02	17:33:16	9.22222	632
2024-11-02	17:43:16	9.22917	630
2024-11-02	17:53:16	9.23611	631
2024-11-02	18:03:16	9.24306	633
2024-11-02	18:13:16	9.25	638
2024-11-02	18:23:16	9.25694	635
2024-11-02	18:33:16	9.26389	634
2024-11-02	18:43:16	9.27083	636
2024-11-02	18:53:16	9.27778	631
2024-11-02	19:03:16	9.28472	627
2024-11-02	19:13:16	9.29167	630
2024-11-02	19:23:16	9.29861	628
2024-11-02	19:33:16	9.30556	641
2024-11-02	19:43:16	9.3125	628
2024-11-02	19:53:16	9.31944	635
2024-11-02	20:03:16	9.32639	636
2024-11-02	20:13:16	9.33333	629
2024-11-02	20:23:16	9.34028	631
2024-11-02	20:33:16	9.34722	636
2024-11-02	20:43:16	9.35417	629
2024-11-02	20:53:16	9.36111	631
2024-11-02	21:03:16	9.36806	637
2024-11-02	21:13:16	9.375	631
2024-11-02	21:23:16	9.38194	634
2024-11-02	21:33:16	9.38889	636
2024-11-02	21:43:16	9.39583	635
2024-11-02	21:53:16	9.40278	632
2024-11-02	22:03:16	9.40972	636
2024-11-02	22:13:16	9.41667	633
2024-11-02	22:23:16	9.42361	641
2024-11-02	22:33:16	9.43056	630
2024-11-02	22:43:16	9.4375	628
2024-11-02	22:53:16	9.44444	633
2024-11-02	23:03:16	9.45139	631
2024-11-02	23:13:16	9.45833	633
2024-11-02	23:23:16	9.46528	627
2024-11-02	23:33:16	9.47222	626
2024-11-02	23:43:16	9.47917	631
2024-11-02	23:53:16	9.48611	633
2024-12-02	00:03:16	9.49306	637
2024-12-02	00:13:16	9.5	634
2024-12-02	00:23:16	9.50694	630
2024-12-02	00:33:16	9.51389	636
2024-12-02	00:43:16	9.52083	636
2024-12-02	00:53:16	9.52778	647
2024-12-02	01:03:16	9.53472	642
2024-12-02	01:13:16	9.54167	636
2024-12-02	01:23:16	9.54861	637
2024-12-02	01:33:16	9.55556	629
2024-12-02	01:43:16	9.5625	633
2024-12-02	01:53:16	9.56944	635
2024-12-02	02:03:16	9.57639	644
2024-12-02	02:13:16	9.58333	629
2024-12-02	02:23:16	9.59028	635
2024-12-02	02:33:16	9.59722	639
2024-12-02	02:43:16	9.60417	639
2024-12-02	02:53:16	9.61111	640
2024-12-02	03:03:16	9.61806	641
2024-12-02	03:13:16	9.625	634
2024-12-02	03:23:16	9.63194	633
2024-12-02	03:33:16	9.63889	632
2024-12-02	03:43:16	9.64583	635
2024-12-02	03:53:16	9.65278	631
2024-12-02	04:03:17	9.65972	630
2024-12-02	04:13:17	9.66667	630
2024-12-02	04:23:17	9.67361	627
2024-12-02	04:33:17	9.68056	630
2024-12-02	04:43:17	9.6875	636
2024-12-02	04:53:17	9.69444	629
2024-12-02	05:03:17	9.70139	633
2024-12-02	05:13:17	9.70833	637
2024-12-02	05:23:17	9.71528	636
2024-12-02	05:33:17	9.72222	642
2024-12-02	05:43:17	9.72917	635
2024-12-02	05:53:17	9.73611	638
2024-12-02	06:03:17	9.74306	633
2024-12-02	06:13:17	9.75	635
2024-12-02	06:23:17	9.75694	641
2024-12-02	06:33:17	9.76389	633
2024-12-02	06:43:17	9.77083	633
2024-12-02	06:53:17	9.77778	643
2024-12-02	07:03:17	9.78472	636
2024-12-02	07:13:17	9.79167	634
2024-12-02	07:23:17	9.79861	631
2024-12-02	07:33:17	9.80556	634
2024-12-02	07:43:17	9.8125	636
2024-12-02	07:53:17	9.81944	636
2024-12-02	08:03:17	9.82639	629
2024-12-02	08:13:17	9.83333	634
2024-12-02	08:23:17	9.84028	631
2024-12-02	08:33:17	9.84722	631
2024-12-02	08:43:17	9.85417	633
2024-12-02	08:53:17	9.86111	633
2024-12-02	09:03:17	9.86806	631
2024-12-02	09:13:17	9.875	641		second injection
2024-12-02	09:23:17	9.88194	636
2024-12-02	09:33:17	9.88889	634
2024-12-02	09:43:17	9.89583	637
2024-12-02	09:53:17	9.90278	635
2024-12-02	10:03:17	9.90972	633
2024-12-02	10:13:17	9.91667	632
2024-12-02	10:23:17	9.92361	637
2024-12-02	10:33:17	9.93056	636
2024-12-02	10:43:17	9.9375	637
2024-12-02	10:53:17	9.94444	635
2024-12-02	11:03:17	9.95139	634
2024-12-02	11:13:17	9.95833	638
2024-12-02	11:23:17	9.96528	641
2024-12-02	11:33:17	9.97222	640
2024-12-02	11:43:17	9.97917	637
2024-12-02	11:53:17	9.98611	639
2024-12-02	12:03:17	9.99306	635
2024-12-02	12:13:17	10	636
2024-12-02	12:23:17	10.0069	632
2024-12-02	12:33:17	10.0139	634
2024-12-02	12:43:17	10.0208	634
2024-12-02	12:53:17	10.0278	634
2024-12-02	13:03:18	10.0347	636
2024-12-02	13:13:18	10.0417	640
2024-12-02	13:23:18	10.0486	633
2024-12-02	13:33:18	10.0556	640
2024-12-02	13:43:18	10.0625	643
2024-12-02	13:53:18	10.0694	638
2024-12-02	14:03:18	10.0764	636
2024-12-02	14:13:18	10.0833	635
2024-12-02	14:23:18	10.0903
2024-12-02	14:33:18	10.0972	644
2024-12-02	14:43:18	10.1042	639
2024-12-02	14:53:18	10.1111	642
2024-12-02	15:03:18	10.1181	645
2024-12-02	15:13:18	10.125	643
2024-12-02	15:23:18	10.1319	640
2024-12-02	15:33:18	10.1389	643
2024-12-02	15:43:18	10.1458	638
2024-12-02	15:53:18	10.1528	636
2024-12-02	16:03:18	10.1597	640
2024-12-02	16:13:18	10.1667	640
2024-12-02	16:23:18	10.1736	641
2024-12-02	16:33:18	10.1806	636
2024-12-02	16:43:18	10.1875	637
2024-12-02	16:53:18	10.1944	638
2024-12-02	17:03:18	10.2014	637
2024-12-02	17:13:18	10.2083	632
2024-12-02	17:23:18	10.2153	630
2024-12-02	17:33:18	10.2222	628
2024-12-02	17:43:18	10.2292	631
2024-12-02	17:53:18	10.2361	633
2024-12-02	18:03:18	10.2431	637
2024-12-02	18:13:18	10.25	632
2024-12-02	18:23:18	10.2569	637
2024-12-02	18:33:18	10.2639	638
2024-12-02	18:43:18	10.2708	640
2024-12-02	18:53:18	10.2778	637
2024-12-02	19:03:18	10.2847	639
2024-12-02	19:13:18	10.2917	634
2024-12-02	19:23:18	10.2986	638
2024-12-02	19:33:18	10.3056	637
2024-12-02	19:43:18	10.3125	642
2024-12-02	19:53:18	10.3194	640
2024-12-02	20:03:18	10.3264	640
2024-12-02	20:13:18	10.3333	641
2024-12-02	20:23:18	10.3403	641
2024-12-02	20:33:18	10.3472	641
2024-12-02	20:43:18	10.3542	641
2024-12-02	20:53:18	10.3611	638
2024-12-02	21:03:18	10.3681	642
2024-12-02	21:13:18	10.375	638
2024-12-02	21:23:18	10.3819	644
2024-12-02	21:33:18	10.3889	642
2024-12-02	21:43:18	10.3958	645
2024-12-02	21:53:18	10.4028	645
2024-12-02	22:03:18	10.4097	647
2024-12-02	22:13:19	10.4167	643
2024-12-02	22:23:19	10.4236	647
2024-12-02	22:33:19	10.4306	649
2024-12-02	22:43:19	10.4375	648
2024-12-02	22:53:19	10.4444	645
2024-12-02	23:03:19	10.4514	647
2024-12-02	23:13:19	10.4583	645
2024-12-02	23:23:19	10.4653	640
2024-12-02	23:33:19	10.4722	634
2024-12-02	23:43:19	10.4792	638
2024-12-02	23:53:19	10.4861	641
13/02/2024	00:03:19	10.4931	633
13/02/2024	00:13:19	10.5	640
13/02/2024	00:23:19	10.5069	634
13/02/2024	00:33:19	10.5139	636
13/02/2024	00:43:19	10.5208	639
13/02/2024	00:53:19	10.5278	639
13/02/2024	01:03:19	10.5347	638
13/02/2024	01:13:19	10.5417	640
13/02/2024	01:23:19	10.5486	635
13/02/2024	01:33:19	10.5556	645
13/02/2024	01:43:19	10.5625	634
13/02/2024	01:53:19	10.5694	640
13/02/2024	02:03:19	10.5764	642
13/02/2024	02:13:19	10.5833	638
13/02/2024	02:23:19	10.5903	642
13/02/2024	02:33:19	10.5972	638
13/02/2024	02:43:19	10.6042	639
13/02/2024	02:53:19	10.6111	640
13/02/2024	03:03:19	10.6181	640
13/02/2024	03:13:19	10.625	642
13/02/2024	03:23:19	10.6319	642
13/02/2024	03:33:19	10.6389	643
13/02/2024	03:43:19	10.6458	641
13/02/2024	03:53:19	10.6528	648
13/02/2024	04:03:19	10.6597	648
13/02/2024	04:13:19	10.6667	642
13/02/2024	04:23:19	10.6736	653
13/02/2024	04:33:19	10.6806	646
13/02/2024	04:43:19	10.6875	645
13/02/2024	04:53:19	10.6944	639
13/02/2024	05:03:19	10.7014	647
13/02/2024	05:13:19	10.7083	649
13/02/2024	05:23:19	10.7153	651
13/02/2024	05:33:19	10.7222	649
13/02/2024	05:43:19	10.7292	651
13/02/2024	05:53:19	10.7361	648
13/02/2024	06:03:19	10.7431	648
13/02/2024	06:13:19	10.75	652
13/02/2024	06:23:19	10.7569	651
13/02/2024	06:33:19	10.7639	647
13/02/2024	06:43:19	10.7708	650
13/02/2024	06:53:19	10.7778	656
13/02/2024	07:03:20	10.7847	645
13/02/2024	07:13:20	10.7917	647
13/02/2024	07:23:20	10.7986	642
13/02/2024	07:33:20	10.8056	649
13/02/2024	07:43:20	10.8125	647
13/02/2024	07:53:20	10.8194	648
13/02/2024	08:03:20	10.8264	654
13/02/2024	08:13:20	10.8333	648
13/02/2024	08:23:20	10.8403	648
13/02/2024	08:33:20	10.8472	643
13/02/2024	08:43:20	10.8542	647
13/02/2024	08:53:20	10.8611	651
13/02/2024	09:03:20	10.8681	653
13/02/2024	09:13:20	10.875	649
13/02/2024	09:23:20	10.8819	646
13/02/2024	09:33:20	10.8889	642
13/02/2024	09:43:20	10.8958	640
13/02/2024	09:53:20	10.9028	639
13/02/2024	10:03:20	10.9097
13/02/2024	10:13:20	10.9167	643
13/02/2024	10:23:20	10.9236	644
13/02/2024	10:33:20	10.9306	645
13/02/2024	10:43:20	10.9375	646
13/02/2024	10:53:20	10.9444	643
13/02/2024	11:03:20	10.9514	643
13/02/2024	11:13:20	10.9583	637
13/02/2024	11:23:20	10.9653	644
13/02/2024	11:33:20	10.9722	647
13/02/2024	11:43:20	10.9792	648
13/02/2024	11:53:20	10.9861	647
13/02/2024	12:03:20	10.9931	646
13/02/2024	12:13:20	11	652
13/02/2024	12:23:20	11.0069	653
13/02/2024	12:33:20	11.0139	654
13/02/2024	12:43:20	11.0208	654
13/02/2024	12:53:20	11.0278	651
13/02/2024	13:03:20	11.0347	651
13/02/2024	13:13:20	11.0417	659
13/02/2024	13:23:20	11.0486	649
13/02/2024	13:33:20	11.0556	658
13/02/2024	13:43:20	11.0625	655
13/02/2024	13:53:20	11.0694	645
13/02/2024	14:03:20	11.0764	650
13/02/2024	14:13:20	11.0833	656
13/02/2024	14:23:20	11.0903	653
13/02/2024	14:33:20	11.0972	647
13/02/2024	14:43:20	11.1042
13/02/2024	14:53:20	11.1111	646
13/02/2024	15:03:20	11.1181	656
13/02/2024	15:13:20	11.125	650
13/02/2024	15:23:20	11.1319	653
13/02/2024	15:33:20	11.1389	654
13/02/2024	15:43:20	11.1458	654
13/02/2024	15:53:20	11.1528	644
13/02/2024	16:03:21	11.1597	653
13/02/2024	16:13:21	11.1667	647
13/02/2024	16:23:21	11.1736	649
13/02/2024	16:33:21	11.1806	649
13/02/2024	16:43:21	11.1875	650
13/02/2024	16:53:21	11.1944	661
13/02/2024	17:03:21	11.2014	653
13/02/2024	17:13:21	11.2083	656
13/02/2024	17:23:21	11.2153	650
13/02/2024	17:33:21	11.2222	654
13/02/2024	17:43:21	11.2292	654
13/02/2024	17:53:21	11.2361	654
13/02/2024	18:03:21	11.2431	657
13/02/2024	18:13:21	11.25	649
13/02/2024	18:23:21	11.2569	657
13/02/2024	18:33:21	11.2639	652
13/02/2024	18:43:21	11.2708	650
13/02/2024	18:53:21	11.2778	659
13/02/2024	19:03:21	11.2847	659
13/02/2024	19:13:21	11.2917	655
13/02/2024	19:23:21	11.2986	665
13/02/2024	19:33:21	11.3056	657
13/02/2024	19:43:21	11.3125	655
13/02/2024	19:53:21	11.3194	657
13/02/2024	20:03:21	11.3264	658
13/02/2024	20:13:21	11.3333	653
13/02/2024	20:23:21	11.3403	655
13/02/2024	20:33:21	11.3472	658
13/02/2024	20:43:21	11.3542	650
13/02/2024	20:53:21	11.3611	653
13/02/2024	21:03:21	11.3681	654
13/02/2024	21:13:21	11.375	655
13/02/2024	21:23:21	11.3819	652
13/02/2024	21:33:21	11.3889	655
13/02/2024	21:43:21	11.3958	655
13/02/2024	21:53:21	11.4028	651
13/02/2024	22:03:21	11.4097	655
13/02/2024	22:13:21	11.4167	650
13/02/2024	22:23:21	11.4236	654
13/02/2024	22:33:21	11.4306	652
13/02/2024	22:43:21	11.4375	655
13/02/2024	22:53:21	11.4444	655
13/02/2024	23:03:21	11.4514	658
13/02/2024	23:13:21	11.4583	657
13/02/2024	23:23:21	11.4653	660
13/02/2024	23:33:21	11.4722	654
13/02/2024	23:43:21	11.4792	661
13/02/2024	23:53:21	11.4861	664
14/02/2024	00:03:21	11.4931	659
14/02/2024	00:13:21	11.5	662
14/02/2024	00:23:21	11.5069	659
14/02/2024	00:33:21	11.5139	659
14/02/2024	00:43:21	11.5208	665
14/02/2024	00:53:21	11.5278	663
14/02/2024	01:03:21	11.5347	663
14/02/2024	01:13:22	11.5417	666
14/02/2024	01:23:22	11.5486	659
14/02/2024	01:33:22	11.5556	660
14/02/2024	01:43:22	11.5625	666
14/02/2024	01:53:22	11.5694	666
14/02/2024	02:03:22	11.5764	664
14/02/2024	02:13:22	11.5833	662
14/02/2024	02:23:22	11.5903	663
14/02/2024	02:33:22	11.5972	666
14/02/2024	02:43:22	11.6042	661
14/02/2024	02:53:22	11.6111	664
14/02/2024	03:03:22	11.6181	661
14/02/2024	03:13:22	11.625	664
14/02/2024	03:23:22	11.6319	665
14/02/2024	03:33:22	11.6389	662
14/02/2024	03:43:22	11.6458	673
14/02/2024	03:53:22	11.6528	671
14/02/2024	04:03:22	11.6597	668
14/02/2024	04:13:22	11.6667	662
14/02/2024	04:23:22	11.6736	663
14/02/2024	04:33:22	11.6806	668
14/02/2024	04:43:22	11.6875	670
14/02/2024	04:53:22	11.6944	662
14/02/2024	05:03:22	11.7014	659
14/02/2024	05:13:22	11.7083	660
14/02/2024	05:23:22	11.7153	663
14/02/2024	05:33:22	11.7222	664
14/02/2024	05:43:22	11.7292	659
14/02/2024	05:53:22	11.7361	660
14/02/2024	06:03:22	11.7431	661
14/02/2024	06:13:22	11.75	655
14/02/2024	06:23:22	11.7569	657
14/02/2024	06:33:22	11.7639	654
14/02/2024	06:43:22	11.7708	651
14/02/2024	06:53:22	11.7778	657
14/02/2024	07:03:22	11.7847	656
14/02/2024	07:13:22	11.7917	658
14/02/2024	07:23:22	11.7986	668
14/02/2024	07:33:22	11.8056	662
14/02/2024	07:43:22	11.8125	666
14/02/2024	07:53:22	11.8194	670
14/02/2024	08:03:22	11.8264	660
14/02/2024	08:13:22	11.8333	661
14/02/2024	08:23:22	11.8403	666
14/02/2024	08:33:22	11.8472	668
14/02/2024	08:43:22	11.8542	664
14/02/2024	08:53:22	11.8611	661
14/02/2024	09:03:22	11.8681	666
14/02/2024	09:13:22	11.875	670
14/02/2024	09:23:22	11.8819	668
14/02/2024	09:33:22	11.8889	668
14/02/2024	09:43:22	11.8958	662
14/02/2024	09:53:22	11.9028	662
14/02/2024	10:03:22	11.9097	657
14/02/2024	10:13:22	11.9167	662
14/02/2024	10:23:23	11.9236	657
14/02/2024	10:33:23	11.9306	661
14/02/2024	10:43:23	11.9375	666
14/02/2024	10:53:23	11.9444	666
14/02/2024	11:03:23	11.9514	663
14/02/2024	11:13:23	11.9583	664
14/02/2024	11:23:23	11.9653	668
14/02/2024	11:33:23	11.9722	668
14/02/2024	11:43:23	11.9792	660
14/02/2024	11:53:23	11.9861	663
14/02/2024	12:03:23	11.9931	660
14/02/2024	12:13:23	12	667
14/02/2024	12:23:23	12.0069	663
14/02/2024	12:33:23	12.0139	667
14/02/2024	12:43:23	12.0208	670
14/02/2024	12:53:23	12.0278	675
14/02/2024	13:03:23	12.0347	672
14/02/2024	13:13:23	12.0417	667
14/02/2024	13:23:23	12.0486	669
14/02/2024	13:33:23	12.0556	674
14/02/2024	13:43:23	12.0625	670
14/02/2024	13:53:23	12.0694	675
14/02/2024	14:03:23	12.0764	671
14/02/2024	14:13:23	12.0833	682
14/02/2024	14:23:23	12.0903	678
14/02/2024	14:33:23	12.0972	670
14/02/2024	14:43:23	12.1042	671
14/02/2024	14:53:23	12.1111	674
14/02/2024	15:03:23	12.1181	673
14/02/2024	15:13:23	12.125	679
14/02/2024	15:23:23	12.1319	678
14/02/2024	15:33:23	12.1389	681
14/02/2024	15:43:23	12.1458	677
14/02/2024	15:53:23	12.1528	677
14/02/2024	16:03:23	12.1597	674
14/02/2024	16:13:23	12.1667	676
14/02/2024	16:23:23	12.1736	668
14/02/2024	16:33:23	12.1806	669
14/02/2024	16:43:23	12.1875	679
14/02/2024	16:53:23	12.1944	673
14/02/2024	17:03:23	12.2014	675
14/02/2024	17:13:23	12.2083	675
14/02/2024	17:23:23	12.2153	670
14/02/2024	17:33:23	12.2222	673
14/02/2024	17:43:23	12.2292	670
14/02/2024	17:53:23	12.2361	672
14/02/2024	18:03:23	12.2431	674
14/02/2024	18:13:23	12.25	668
14/02/2024	18:23:23	12.2569	682
14/02/2024	18:33:23	12.2639	677
14/02/2024	18:43:23	12.2708	680
14/02/2024	18:53:23	12.2778	679
14/02/2024	19:03:23	12.2847	677
14/02/2024	19:13:23	12.2917	675
14/02/2024	19:23:23	12.2986	674
14/02/2024	19:33:24	12.3056	680
14/02/2024	19:43:24	12.3125	672
14/02/2024	19:53:24	12.3194	672
14/02/2024	20:03:24	12.3264	672
14/02/2024	20:13:24	12.3333	671
14/02/2024	20:23:24	12.3403	666
14/02/2024	20:33:24	12.3472	662
14/02/2024	20:43:24	12.3542	664
14/02/2024	20:53:24	12.3611	670
14/02/2024	21:03:24	12.3681	670
14/02/2024	21:13:24	12.375	671
14/02/2024	21:23:24	12.3819	672
14/02/2024	21:33:24	12.3889	673
14/02/2024	21:43:24	12.3958	678
14/02/2024	21:53:24	12.4028	673
14/02/2024	22:03:24	12.4097	671
14/02/2024	22:13:24	12.4167	670
14/02/2024	22:23:24	12.4236	669
14/02/2024	22:33:24	12.4306	674
14/02/2024	22:43:24	12.4375	662
14/02/2024	22:53:24	12.4444	667
14/02/2024	23:03:24	12.4514	671
14/02/2024	23:13:24	12.4583	672
14/02/2024	23:23:24	12.4653	666
14/02/2024	23:33:24	12.4722	674
14/02/2024	23:43:24	12.4792	667
14/02/2024	23:53:24	12.4861	667
15/02/2024	00:03:24	12.4931	671
15/02/2024	00:13:24	12.5	671
15/02/2024	00:23:24	12.5069	660
15/02/2024	00:33:24	12.5139	665
15/02/2024	00:43:24	12.5208	661
15/02/2024	00:53:24	12.5278	665
15/02/2024	01:03:24	12.5347	662
15/02/2024	01:13:24	12.5417	660
15/02/2024	01:23:24	12.5486	656
15/02/2024	01:33:24	12.5556	663
15/02/2024	01:43:24	12.5625	666
15/02/2024	01:53:24	12.5694	666
15/02/2024	02:03:24	12.5764	660
15/02/2024	02:13:24	12.5833	665
15/02/2024	02:23:24	12.5903	663
15/02/2024	02:33:24	12.5972	659
15/02/2024	02:43:24	12.6042	662
15/02/2024	02:53:24	12.6111	665
15/02/2024	03:03:24	12.6181	667
15/02/2024	03:13:24	12.625	664
15/02/2024	03:23:24	12.6319	669
15/02/2024	03:33:24	12.6389	668
15/02/2024	03:43:24	12.6458	663
15/02/2024	03:53:24	12.6528	661
15/02/2024	04:03:24	12.6597	664
15/02/2024	04:13:24	12.6667	666
15/02/2024	04:23:24	12.6736	662
15/02/2024	04:33:25	12.6806	661
15/02/2024	04:43:25	12.6875	664
15/02/2024	04:53:25	12.6944	659
15/02/2024	05:03:25	12.7014	667
15/02/2024	05:13:25	12.7083	666
15/02/2024	05:23:25	12.7153	659
15/02/2024	05:33:25	12.7222	660
15/02/2024	05:43:25	12.7292	663
15/02/2024	05:53:25	12.7361	667
15/02/2024	06:03:25	12.7431	672
15/02/2024	06:13:25	12.75	674
15/02/2024	06:23:25	12.7569	667
15/02/2024	06:33:25	12.7639	671
15/02/2024	06:43:25	12.7708	666
15/02/2024	06:53:25	12.7778	666
15/02/2024	07:03:25	12.7847	677
15/02/2024	07:13:25	12.7917	662
15/02/2024	07:23:25	12.7986	668
15/02/2024	07:33:25	12.8056	671
15/02/2024	07:43:25	12.8125	668
15/02/2024	07:53:25	12.8194	669
15/02/2024	08:03:25	12.8264	666
15/02/2024	08:13:25	12.8333	671
15/02/2024	08:23:25	12.8403	679
15/02/2024	08:33:25	12.8472	676
15/02/2024	08:43:25	12.8542	666
15/02/2024	08:53:25	12.8611	671
15/02/2024	09:03:25	12.8681	676
15/02/2024	09:13:25	12.875	667
15/02/2024	09:23:25	12.8819	675
15/02/2024	09:33:25	12.8889	674
15/02/2024	09:43:25	12.8958	670
15/02/2024	09:53:25	12.9028	671
15/02/2024	10:03:25	12.9097	673
15/02/2024	10:13:25	12.9167	671
15/02/2024	10:23:25	12.9236	673
15/02/2024	10:33:25	12.9306	668
15/02/2024	10:43:25	12.9375	670
15/02/2024	10:53:25	12.9444	672
15/02/2024	11:03:25	12.9514	663
15/02/2024	11:13:25	12.9583	670
15/02/2024	11:23:25	12.9653	671
15/02/2024	11:33:25	12.9722	666
15/02/2024	11:43:25	12.9792	668
15/02/2024	11:53:25	12.9861	672
15/02/2024	12:03:25	12.9931	668
15/02/2024	12:13:25	13	671
15/02/2024	12:23:25	13.0069	671
15/02/2024	12:33:25	13.0139	673
15/02/2024	12:43:25	13.0208	676
15/02/2024	12:53:25	13.0278	673
15/02/2024	13:03:25	13.0347	668
15/02/2024	13:13:25	13.0417	671
15/02/2024	13:23:25	13.0486	671
15/02/2024	13:33:25	13.0556	671
15/02/2024	13:43:25	13.0625	667
15/02/2024	13:53:25	13.0694	666
15/02/2024	14:03:25	13.0764	665
15/02/2024	14:13:25	13.0833	663
15/02/2024	14:23:25	13.0903	668
15/02/2024	14:33:25	13.0972	676
15/02/2024	14:43:25	13.1042	674
15/02/2024	14:53:25	13.1111	673
15/02/2024	15:03:25	13.1181	671
15/02/2024	15:13:25	13.125	672
15/02/2024	15:23:25	13.1319	667
15/02/2024	15:33:25	13.1389	665
15/02/2024	15:43:26	13.1458	672
15/02/2024	15:53:26	13.1528	669
15/02/2024	16:03:26	13.1597	675
15/02/2024	16:13:26	13.1667	674
15/02/2024	16:23:26	13.1736	664
15/02/2024	16:33:26	13.1806	670
15/02/2024	16:43:26	13.1875	667
15/02/2024	16:53:26	13.1944	660
15/02/2024	17:03:26	13.2014	667
15/02/2024	17:13:26	13.2083	667
15/02/2024	17:23:26	13.2153	660
15/02/2024	17:33:26	13.2222	662
15/02/2024	17:43:26	13.2292	655
15/02/2024	17:53:26	13.2361	659
15/02/2024	18:03:26	13.2431	657
15/02/2024	18:13:26	13.25	658
15/02/2024	18:23:26	13.2569	665
15/02/2024	18:33:26	13.2639	665
15/02/2024	18:43:26	13.2708	664
15/02/2024	18:53:26	13.2778	663
15/02/2024	19:03:26	13.2847	666
15/02/2024	19:13:26	13.2917	666
15/02/2024	19:23:26	13.2986	665
15/02/2024	19:33:26	13.3056	666
15/02/2024	19:43:26	13.3125	658
15/02/2024	19:53:26	13.3194	661
15/02/2024	20:03:26	13.3264	668
15/02/2024	20:13:26	13.3333	661
15/02/2024	20:23:26	13.3403	663
15/02/2024	20:33:26	13.3472	656
15/02/2024	20:43:26	13.3542	660
15/02/2024	20:53:26	13.3611	657
15/02/2024	21:03:26	13.3681	658
15/02/2024	21:13:26	13.375	663
15/02/2024	21:23:26	13.3819	662
15/02/2024	21:33:26	13.3889	663
15/02/2024	21:43:26	13.3958	667
15/02/2024	21:53:26	13.4028	663
15/02/2024	22:03:26	13.4097	663
15/02/2024	22:13:26	13.4167	661
15/02/2024	22:23:26	13.4236	666
15/02/2024	22:33:26	13.4306	667
15/02/2024	22:43:26	13.4375	663
15/02/2024	22:53:26	13.4444	666
15/02/2024	23:03:26	13.4514	662
15/02/2024	23:13:26	13.4583	666
15/02/2024	23:23:26	13.4653	664
15/02/2024	23:33:26	13.4722	668
15/02/2024	23:43:26	13.4792	671
15/02/2024	23:53:26	13.4861	674
16/02/2024	00:03:26	13.4931	665
16/02/2024	00:13:26	13.5	666
16/02/2024	00:23:26	13.5069	669
16/02/2024	00:33:26	13.5139	673
16/02/2024	00:43:26	13.5208	664
16/02/2024	00:53:27	13.5278	669
16/02/2024	01:03:27	13.5347	668
16/02/2024	01:13:27	13.5417	673
16/02/2024	01:23:27	13.5486	673
16/02/2024	01:33:27	13.5556	670
16/02/2024	01:43:27	13.5625	665
16/02/2024	01:53:27	13.5694	660
16/02/2024	02:03:27	13.5764	666
16/02/2024	02:13:27	13.5833	669
16/02/2024	02:23:27	13.5903	659
16/02/2024	02:33:27	13.5972	658
16/02/2024	02:43:27	13.6042	665
16/02/2024	02:53:27	13.6111	664
16/02/2024	03:03:27	13.6181	667
16/02/2024	03:13:27	13.625	671
16/02/2024	03:23:27	13.6319	662
16/02/2024	03:33:27	13.6389	667
16/02/2024	03:43:27	13.6458	666
16/02/2024	03:53:27	13.6528	673
16/02/2024	04:03:27	13.6597	668
16/02/2024	04:13:27	13.6667	667
16/02/2024	04:23:27	13.6736	661
16/02/2024	04:33:27	13.6806	662
16/02/2024	04:43:27	13.6875	668
16/02/2024	04:53:27	13.6944	667
16/02/2024	05:03:27	13.7014	666
16/02/2024	05:13:27	13.7083	664
16/02/2024	05:23:27	13.7153	664
16/02/2024	05:33:27	13.7222	671
16/02/2024	05:43:27	13.7292	673
16/02/2024	05:53:27	13.7361	669
16/02/2024	06:03:27	13.7431	671
16/02/2024	06:13:27	13.75	668
16/02/2024	06:23:27	13.7569	663
16/02/2024	06:33:27	13.7639	662
16/02/2024	06:43:27	13.7708	659
16/02/2024	06:53:27	13.7778	667
16/02/2024	07:03:27	13.7847	666
16/02/2024	07:13:27	13.7917	672
16/02/2024	07:23:27	13.7986	669
16/02/2024	07:33:27	13.8056	662
16/02/2024	07:43:27	13.8125	668
16/02/2024	07:53:27	13.8194	660
16/02/2024	08:03:27	13.8264	669
16/02/2024	08:13:27	13.8333	671
16/02/2024	08:23:27	13.8403	669
16/02/2024	08:33:27	13.8472	672
16/02/2024	08:43:27	13.8542	666
16/02/2024	08:53:27	13.8611	673
16/02/2024	09:03:27	13.8681	665
16/02/2024	09:13:27	13.875	664
[truncated: 744 more rows]

## Sheet: measured CO2 - MN
Date		Time [d]	CO2 [ppm]
22/02/2024	08:40:15	0			First injection	0.986111	d
22/02/2024	08:50:15	0.00694444	559		Second injection	7.02778	d
22/02/2024	09:00:15	0.0138889	558
22/02/2024	09:10:15	0.0208333	568
22/02/2024	09:20:15	0.0277778	560
22/02/2024	09:30:15	0.0347222
22/02/2024	09:40:15	0.0416667	560
22/02/2024	09:50:15	0.0486111	563
22/02/2024	10:00:15	0.0555556	563
22/02/2024	10:10:16	0.0625	570
22/02/2024	10:20:16	0.0694444	594
22/02/2024	10:30:16	0.0763889	590
22/02/2024	10:40:16	0.0833333	585
22/02/2024	10:50:16	0.0902778	591
22/02/2024	11:00:16	0.0972222	592
22/02/2024	11:10:16	0.104167	587
22/02/2024	11:20:16	0.111111	581
22/02/2024	11:30:16	0.118056	589
22/02/2024	11:40:16	0.125	589
22/02/2024	11:50:16	0.131944	594
22/02/2024	12:00:16	0.138889	588
22/02/2024	12:10:16	0.145833	594
22/02/2024	12:20:16	0.152778	593
22/02/2024	12:30:16	0.159722	590
22/02/2024	12:40:16	0.166667	585
22/02/2024	12:50:16	0.173611	591
22/02/2024	13:00:16	0.180556	587
22/02/2024	13:10:16	0.1875	588
22/02/2024	13:20:16	0.194444	588
22/02/2024	13:30:16	0.201389	588
22/02/2024	13:40:16	0.208333	591
22/02/2024	13:50:16	0.215278	590
22/02/2024	14:00:16	0.222222	591
22/02/2024	14:10:16	0.229167	587
22/02/2024	14:20:16	0.236111	592
22/02/2024	14:30:16	0.243056	590
22/02/2024	14:40:16	0.25	591
22/02/2024	14:50:16	0.256944	589
22/02/2024	15:00:16	0.263889	591
22/02/2024	15:10:16	0.270833	593
22/02/2024	15:20:16	0.277778	581
22/02/2024	15:30:16	0.284722	587
22/02/2024	15:40:16	0.291667	585
22/02/2024	15:50:16	0.298611	585
22/02/2024	16:00:16	0.305556	585
22/02/2024	16:10:16	0.3125	580
22/02/2024	16:20:16	0.319444	586
22/02/2024	16:30:16	0.326389	586
22/02/2024	16:40:16	0.333333	595
22/02/2024	16:50:16	0.340278	594
22/02/2024	17:00:16	0.347222	589
22/02/2024	17:10:16	0.354167	585
22/02/2024	17:20:16	0.361111	587
22/02/2024	17:30:16	0.368056	586
22/02/2024	17:40:16	0.375	594
22/02/2024	17:50:16	0.381944	588
22/02/2024	18:00:16	0.388889	585
22/02/2024	18:10:16	0.395833	583
22/02/2024	18:20:16	0.402778	588
22/02/2024	18:30:16	0.409722	588
22/02/2024	18:40:16	0.416667	590
22/02/2024	18:50:16	0.423611	583
22/02/2024	19:00:16	0.430556	589
22/02/2024	19:10:17	0.4375	589
22/02/2024	19:20:17	0.444444	581
22/02/2024	19:30:17	0.451389	589
22/02/2024	19:40:17	0.458333	586
22/02/2024	19:50:17	0.465278	585
22/02/2024	20:00:17	0.472222	585
22/02/2024	20:10:17	0.479167	582
22/02/2024	20:20:17	0.486111	582
22/02/2024	20:30:17	0.493056	582
22/02/2024	20:40:17	0.5	584
22/02/2024	20:50:17	0.506944	580
22/02/2024	21:00:17	0.513889	577
22/02/2024	21:10:17	0.520833	584
22/02/2024	21:20:17	0.527778	588
22/02/2024	21:30:17	0.534722	584
22/02/2024	21:40:17	0.541667	581
22/02/2024	21:50:17	0.548611	581
22/02/2024	22:00:17	0.555556	578
22/02/2024	22:10:17	0.5625	577
22/02/2024	22:20:17	0.569444	575
22/02/2024	22:30:17	0.576389	569
22/02/2024	22:40:17	0.583333	572
22/02/2024	22:50:17	0.590278	569
22/02/2024	23:00:17	0.597222	569
22/02/2024	23:10:17	0.604167	573
22/02/2024	23:20:17	0.611111	581
22/02/2024	23:30:17	0.618056	575
22/02/2024	23:40:17	0.625	578
22/02/2024	23:50:17	0.631944	572
23/02/2024	00:00:17	0.638889	572
23/02/2024	00:10:17	0.645833	573
23/02/2024	00:20:17	0.652778	569
23/02/2024	00:30:17	0.659722	567
23/02/2024	00:40:17	0.666667	568
23/02/2024	00:50:17	0.673611	575
23/02/2024	01:00:17	0.680556	574
23/02/2024	01:10:17	0.6875	576
23/02/2024	01:20:17	0.694444	571
23/02/2024	01:30:17	0.701389	568
23/02/2024	01:40:17	0.708333	573
23/02/2024	01:50:17	0.715278	572
23/02/2024	02:00:17	0.722222	575
23/02/2024	02:10:17	0.729167	573
23/02/2024	02:20:17	0.736111	572
23/02/2024	02:30:17	0.743056	574
23/02/2024	02:40:17	0.75	568
23/02/2024	02:50:17	0.756944	564
23/02/2024	03:00:17	0.763889	574
23/02/2024	03:10:17	0.770833	567
23/02/2024	03:20:17	0.777778	567
23/02/2024	03:30:17	0.784722	563
23/02/2024	03:40:17	0.791667	564
23/02/2024	03:50:17	0.798611	573
23/02/2024	04:00:17	0.805556	568
23/02/2024	04:10:17	0.8125	569
23/02/2024	04:20:18	0.819444	575
23/02/2024	04:30:18	0.826389	573
23/02/2024	04:40:18	0.833333	573
23/02/2024	04:50:18	0.840278	573
23/02/2024	05:00:18	0.847222	570
23/02/2024	05:10:18	0.854167	576
23/02/2024	05:20:18	0.861111	576
23/02/2024	05:30:18	0.868056	572
23/02/2024	05:40:18	0.875	568
23/02/2024	05:50:18	0.881944	569
23/02/2024	06:00:18	0.888889	565
23/02/2024	06:10:18	0.895833	562
23/02/2024	06:20:18	0.902778	566
23/02/2024	06:30:18	0.909722	567
23/02/2024	06:40:18	0.916667	568
23/02/2024	06:50:18	0.923611	564
23/02/2024	07:00:18	0.930556	575
23/02/2024	07:10:18	0.9375	568
23/02/2024	07:20:18	0.944444	566
23/02/2024	07:30:18	0.951389	575
23/02/2024	07:40:18	0.958333	572
23/02/2024	07:50:18	0.965278	575
23/02/2024	08:00:18	0.972222	578
23/02/2024	08:10:18	0.979167	578
23/02/2024	08:20:18	0.986111	573		first injection
23/02/2024	08:30:18	0.993056	575
23/02/2024	08:40:18	1	574
23/02/2024	08:50:18	1.00694	574
23/02/2024	09:00:18	1.01389	574
23/02/2024	09:10:18	1.02083	573
23/02/2024	09:20:18	1.02778	571
23/02/2024	09:30:18	1.03472	572
23/02/2024	09:40:18	1.04167	577
23/02/2024	09:50:18	1.04861	576
23/02/2024	10:00:18	1.05556	568
23/02/2024	10:10:18	1.0625	573
23/02/2024	10:20:18	1.06944	574
23/02/2024	10:30:18	1.07639	572
23/02/2024	10:40:18	1.08333	573
23/02/2024	10:50:18	1.09028	570
23/02/2024	11:00:18	1.09722	565
23/02/2024	11:10:18	1.10417	566
23/02/2024	11:20:18	1.11111	568
23/02/2024	11:30:18	1.11806	567
23/02/2024	11:40:18	1.125	568
23/02/2024	11:50:18	1.13194	575
23/02/2024	12:00:18	1.13889	578
23/02/2024	12:10:18	1.14583	580
23/02/2024	12:20:18	1.15278	574
23/02/2024	12:30:18	1.15972	570
23/02/2024	12:40:18	1.16667	571
23/02/2024	12:50:18	1.17361	573
23/02/2024	13:00:18	1.18056	573
23/02/2024	13:10:18	1.1875	572
23/02/2024	13:20:18	1.19444	578
23/02/2024	13:30:19	1.20139	569
23/02/2024	13:40:19	1.20833	575
23/02/2024	13:50:19	1.21528	582
23/02/2024	14:00:19	1.22222	587
23/02/2024	14:10:19	1.22917	580
23/02/2024	14:20:19	1.23611	581
23/02/2024	14:30:19	1.24306	577
23/02/2024	14:40:19	1.25	582
23/02/2024	14:50:19	1.25694	575
23/02/2024	15:00:19	1.26389	576
23/02/2024	15:10:19	1.27083	583
23/02/2024	15:20:19	1.27778	582
23/02/2024	15:30:19	1.28472	583
23/02/2024	15:40:19	1.29167	578
23/02/2024	15:50:19	1.29861	580
23/02/2024	16:00:19	1.30556	581
23/02/2024	16:10:19	1.3125	575
23/02/2024	16:20:19	1.31944	583
23/02/2024	16:30:19	1.32639	580
23/02/2024	16:40:19	1.33333	580
23/02/2024	16:50:19	1.34028	580
23/02/2024	17:00:19	1.34722	581
23/02/2024	17:10:19	1.35417	577
23/02/2024	17:20:19	1.36111	579
23/02/2024	17:30:19	1.36806	578
23/02/2024	17:40:19	1.375	582
23/02/2024	17:50:19	1.38194	583
23/02/2024	18:00:19	1.38889	578
23/02/2024	18:10:19	1.39583	578
23/02/2024	18:20:19	1.40278	580
23/02/2024	18:30:19	1.40972	576
23/02/2024	18:40:19	1.41667	570
23/02/2024	18:50:19	1.42361	575
23/02/2024	19:00:19	1.43056	579
23/02/2024	19:10:19	1.4375	579
23/02/2024	19:20:19	1.44444	579
23/02/2024	19:30:19	1.45139	578
23/02/2024	19:40:19	1.45833	574
23/02/2024	19:50:19	1.46528	573
23/02/2024	20:00:19	1.47222	577
23/02/2024	20:10:19	1.47917	574
23/02/2024	20:20:19	1.48611	572
23/02/2024	20:30:19	1.49306	577
23/02/2024	20:40:19	1.5	573
23/02/2024	20:50:19	1.50694	573
23/02/2024	21:00:19	1.51389	583
23/02/2024	21:10:19	1.52083	584
23/02/2024	21:20:19	1.52778	585
23/02/2024	21:30:19	1.53472	582
23/02/2024	21:40:19	1.54167	581
23/02/2024	21:50:19	1.54861	576
23/02/2024	22:00:19	1.55556	578
23/02/2024	22:10:19	1.5625	577
23/02/2024	22:20:19	1.56944	570
23/02/2024	22:30:20	1.57639	583
23/02/2024	22:40:20	1.58333	582
23/02/2024	22:50:20	1.59028	577
23/02/2024	23:00:20	1.59722	575
23/02/2024	23:10:20	1.60417	576
23/02/2024	23:20:20	1.61111	573
23/02/2024	23:30:20	1.61806	570
23/02/2024	23:40:20	1.625	579
23/02/2024	23:50:20	1.63194	584
24/02/2024	00:00:20	1.63889	585
24/02/2024	00:10:20	1.64583	586
24/02/2024	00:20:20	1.65278	591
24/02/2024	00:30:20	1.65972	585
24/02/2024	00:40:20	1.66667	586
24/02/2024	00:50:20	1.67361	588
24/02/2024	01:00:20	1.68056	589
24/02/2024	01:10:20	1.6875	585
24/02/2024	01:20:20	1.69444	584
24/02/2024	01:30:20	1.70139	581
24/02/2024	01:40:20	1.70833	579
24/02/2024	01:50:20	1.71528	580
24/02/2024	02:00:20	1.72222	579
24/02/2024	02:10:20	1.72917	584
24/02/2024	02:20:20	1.73611	584
24/02/2024	02:30:20	1.74306	587
24/02/2024	02:40:20	1.75	585
24/02/2024	02:50:20	1.75694	586
24/02/2024	03:00:20	1.76389	583
24/02/2024	03:10:20	1.77083	585
24/02/2024	03:20:20	1.77778	584
24/02/2024	03:30:20	1.78472	579
24/02/2024	03:40:20	1.79167	584
24/02/2024	03:50:20	1.79861	580
24/02/2024	04:00:20	1.80556	575
24/02/2024	04:10:20	1.8125	579
24/02/2024	04:20:20	1.81944	581
24/02/2024	04:30:20	1.82639	579
24/02/2024	04:40:20	1.83333	577
24/02/2024	04:50:20	1.84028	576
24/02/2024	05:00:20	1.84722	577
24/02/2024	05:10:20	1.85417	584
24/02/2024	05:20:20	1.86111	585
24/02/2024	05:30:20	1.86806	582
24/02/2024	05:40:20	1.875	583
24/02/2024	05:50:20	1.88194	578
24/02/2024	06:00:20	1.88889	576
24/02/2024	06:10:20	1.89583	579
24/02/2024	06:20:21	1.90278	575
24/02/2024	06:30:21	1.90972	580
24/02/2024	06:40:21	1.91667	576
24/02/2024	06:50:21	1.92361	573
24/02/2024	07:00:21	1.93056	573
24/02/2024	07:10:21	1.9375	579
24/02/2024	07:20:21	1.94444	586
24/02/2024	07:30:21	1.95139	588
24/02/2024	07:40:21	1.95833	578
24/02/2024	07:50:21	1.96528	584
24/02/2024	08:00:21	1.97222	590
24/02/2024	08:10:21	1.97917	582
24/02/2024	08:20:21	1.98611	588
24/02/2024	08:30:21	1.99306	588
24/02/2024	08:40:21	2	578
24/02/2024	08:50:21	2.00694	576
24/02/2024	09:00:21	2.01389	581
24/02/2024	09:10:21	2.02083	582
24/02/2024	09:20:21	2.02778	582
24/02/2024	09:30:21	2.03472	577
24/02/2024	09:40:21	2.04167	584
24/02/2024	09:50:21	2.04861	583
24/02/2024	10:00:21	2.05556	584
24/02/2024	10:10:21	2.0625	584
24/02/2024	10:20:21	2.06944	581
24/02/2024	10:30:21	2.07639	582
24/02/2024	10:40:21	2.08333	578
24/02/2024	10:50:21	2.09028	582
24/02/2024	11:00:21	2.09722	579
24/02/2024	11:10:21	2.10417	581
24/02/2024	11:20:21	2.11111	584
24/02/2024	11:30:21	2.11806	584
24/02/2024	11:40:21	2.125	585
24/02/2024	11:50:21	2.13194	581
24/02/2024	12:00:21	2.13889	579
24/02/2024	12:10:21	2.14583	577
24/02/2024	12:20:21	2.15278	578
24/02/2024	12:30:21	2.15972	575
24/02/2024	12:40:21	2.16667	580
24/02/2024	12:50:21	2.17361	570
24/02/2024	13:00:21	2.18056	577
24/02/2024	13:10:21	2.1875	575
24/02/2024	13:20:21	2.19444	581
24/02/2024	13:30:21	2.20139	577
24/02/2024	13:40:21	2.20833	575
24/02/2024	13:50:21	2.21528	577
24/02/2024	14:00:21	2.22222	581
24/02/2024	14:10:21	2.22917	579
24/02/2024	14:20:21	2.23611	578
24/02/2024	14:30:21	2.24306	578
24/02/2024	14:40:21	2.25	582
24/02/2024	14:50:21	2.25694	583
24/02/2024	15:00:21	2.26389	579
24/02/2024	15:10:21	2.27083	579
24/02/2024	15:20:21	2.27778	580
24/02/2024	15:30:21	2.28472	577
24/02/2024	15:40:22	2.29167	576
24/02/2024	15:50:22	2.29861	582
24/02/2024	16:00:22	2.30556	575
24/02/2024	16:10:22	2.3125	572
24/02/2024	16:20:22	2.31944	579
24/02/2024	16:30:22	2.32639	570
24/02/2024	16:40:22	2.33333	570
24/02/2024	16:50:22	2.34028	573
24/02/2024	17:00:22	2.34722	571
24/02/2024	17:10:22	2.35417	576
24/02/2024	17:20:22	2.36111	574
24/02/2024	17:30:22	2.36806	579
24/02/2024	17:40:22	2.375	583
24/02/2024	17:50:22	2.38194	581
24/02/2024	18:00:22	2.38889	579
24/02/2024	18:10:22	2.39583	580
24/02/2024	18:20:22	2.40278	576
24/02/2024	18:30:22	2.40972	578
24/02/2024	18:40:22	2.41667	579
24/02/2024	18:50:22	2.42361	585
24/02/2024	19:00:22	2.43056	584
24/02/2024	19:10:22	2.4375	579
24/02/2024	19:20:22	2.44444	584
24/02/2024	19:30:22	2.45139	582
24/02/2024	19:40:22	2.45833	580
24/02/2024	19:50:22	2.46528	577
24/02/2024	20:00:22	2.47222	581
24/02/2024	20:10:22	2.47917	581
24/02/2024	20:20:22	2.48611	575
24/02/2024	20:30:22	2.49306	580
24/02/2024	20:40:22	2.5	574
24/02/2024	20:50:22	2.50694	577
24/02/2024	21:00:22	2.51389	579
24/02/2024	21:10:22	2.52083	580
24/02/2024	21:20:22	2.52778	583
24/02/2024	21:30:22	2.53472	581
24/02/2024	21:40:22	2.54167	576
24/02/2024	21:50:22	2.54861	577
24/02/2024	22:00:22	2.55556	578
24/02/2024	22:10:22	2.5625	577
24/02/2024	22:20:22	2.56944	575
24/02/2024	22:30:22	2.57639	572
24/02/2024	22:40:22	2.58333	572
24/02/2024	22:50:22	2.59028	580
24/02/2024	23:00:22	2.59722	579
24/02/2024	23:10:22	2.60417	585
24/02/2024	23:20:22	2.61111	585
24/02/2024	23:30:22	2.61806	582
24/02/2024	23:40:22	2.625	576
24/02/2024	23:50:22	2.63194	570
25/02/2024	00:00:22	2.63889	570
25/02/2024	00:10:22	2.64583	572
25/02/2024	00:20:22	2.65278	571
25/02/2024	00:30:22	2.65972	575
25/02/2024	00:40:22	2.66667	570
25/02/2024	00:50:22	2.67361	565
25/02/2024	01:00:23	2.68056	573
25/02/2024	01:10:23	2.6875	574
25/02/2024	01:20:23	2.69444	572
25/02/2024	01:30:23	2.70139	574
25/02/2024	01:40:23	2.70833	573
25/02/2024	01:50:23	2.71528	571
25/02/2024	02:00:23	2.72222	575
25/02/2024	02:10:23	2.72917	574
25/02/2024	02:20:23	2.73611	571
25/02/2024	02:30:23	2.74306	569
25/02/2024	02:40:23	2.75	563
25/02/2024	02:50:23	2.75694	570
25/02/2024	03:00:23	2.76389	572
25/02/2024	03:10:23	2.77083	575
25/02/2024	03:20:23	2.77778	578
25/02/2024	03:30:23	2.78472	583
25/02/2024	03:40:23	2.79167	584
25/02/2024	03:50:23	2.79861	580
25/02/2024	04:00:23	2.80556	580
25/02/2024	04:10:23	2.8125	582
25/02/2024	04:20:23	2.81944	575
25/02/2024	04:30:23	2.82639	579
25/02/2024	04:40:23	2.83333	579
25/02/2024	04:50:23	2.84028	577
25/02/2024	05:00:23	2.84722	572
25/02/2024	05:10:23	2.85417	566
25/02/2024	05:20:23	2.86111	575
25/02/2024	05:30:23	2.86806	579
25/02/2024	05:40:23	2.875	575
25/02/2024	05:50:23	2.88194	567
25/02/2024	06:00:23	2.88889	574
25/02/2024	06:10:23	2.89583	573
25/02/2024	06:20:23	2.90278	572
25/02/2024	06:30:23	2.90972	572
25/02/2024	06:40:23	2.91667	569
25/02/2024	06:50:23	2.92361	571
25/02/2024	07:00:23	2.93056	571
25/02/2024	07:10:23	2.9375	576
25/02/2024	07:20:23	2.94444	574
25/02/2024	07:30:23	2.95139	568
25/02/2024	07:40:23	2.95833	566
25/02/2024	07:50:23	2.96528	559
25/02/2024	08:00:23	2.97222	562
25/02/2024	08:10:23	2.97917	567
25/02/2024	08:20:23	2.98611	566
25/02/2024	08:30:23	2.99306	570
25/02/2024	08:40:23	3	573
25/02/2024	08:50:23	3.00694	568
25/02/2024	09:00:23	3.01389	577
25/02/2024	09:10:23	3.02083	568
25/02/2024	09:20:23	3.02778	566
25/02/2024	09:30:23	3.03472	571
25/02/2024	09:40:23	3.04167	570
25/02/2024	09:50:23	3.04861	565
25/02/2024	10:00:23	3.05556	561
25/02/2024	10:10:23	3.0625	564
25/02/2024	10:20:24	3.06944	567
25/02/2024	10:30:24	3.07639	562
25/02/2024	10:40:24	3.08333	563
25/02/2024	10:50:24	3.09028	565
25/02/2024	11:00:24	3.09722	571
25/02/2024	11:10:24	3.10417	570
25/02/2024	11:20:24	3.11111	566
25/02/2024	11:30:24	3.11806	563
25/02/2024	11:40:24	3.125	564
25/02/2024	11:50:24	3.13194	560
25/02/2024	12:00:24	3.13889	560
25/02/2024	12:10:24	3.14583	556
25/02/2024	12:20:24	3.15278	557
25/02/2024	12:30:24	3.15972	557
25/02/2024	12:40:24	3.16667	554
25/02/2024	12:50:24	3.17361	557
25/02/2024	13:00:24	3.18056	557
25/02/2024	13:10:24	3.1875	552
25/02/2024	13:20:24	3.19444	557
25/02/2024	13:30:24	3.20139	558
25/02/2024	13:40:24	3.20833	556
25/02/2024	13:50:24	3.21528	558
25/02/2024	14:00:24	3.22222	551
25/02/2024	14:10:24	3.22917	545
25/02/2024	14:20:24	3.23611	550
25/02/2024	14:30:24	3.24306	556
25/02/2024	14:40:24	3.25	555
25/02/2024	14:50:24	3.25694	559
25/02/2024	15:00:24	3.26389	554
25/02/2024	15:10:24	3.27083	557
25/02/2024	15:20:24	3.27778	550
25/02/2024	15:30:24	3.28472	550
25/02/2024	15:40:24	3.29167	554
25/02/2024	15:50:24	3.29861	550
25/02/2024	16:00:24	3.30556	555
25/02/2024	16:10:24	3.3125	554
25/02/2024	16:20:24	3.31944	555
25/02/2024	16:30:24	3.32639	552
25/02/2024	16:40:24	3.33333	558
25/02/2024	16:50:24	3.34028	563
25/02/2024	17:00:24	3.34722	555
25/02/2024	17:10:24	3.35417	560
25/02/2024	17:20:24	3.36111	554
25/02/2024	17:30:24	3.36806	559
25/02/2024	17:40:24	3.375	554
25/02/2024	17:50:24	3.38194	553
25/02/2024	18:00:24	3.38889	552
25/02/2024	18:10:24	3.39583	553
25/02/2024	18:20:24	3.40278	549
25/02/2024	18:30:24	3.40972	547
25/02/2024	18:40:24	3.41667	550
25/02/2024	18:50:24	3.42361	553
25/02/2024	19:00:24	3.43056	555
25/02/2024	19:10:24	3.4375	555
25/02/2024	19:20:24	3.44444	550
25/02/2024	19:30:24	3.45139	554
25/02/2024	19:40:25	3.45833	553
25/02/2024	19:50:25	3.46528	552
25/02/2024	20:00:25	3.47222	551
25/02/2024	20:10:25	3.47917	556
25/02/2024	20:20:25	3.48611	550
25/02/2024	20:30:25	3.49306	553
25/02/2024	20:40:25	3.5	547
25/02/2024	20:50:25	3.50694	548
25/02/2024	21:00:25	3.51389	548
25/02/2024	21:10:25	3.52083	543
25/02/2024	21:20:25	3.52778	544
25/02/2024	21:30:25	3.53472	545
25/02/2024	21:40:25	3.54167	551
25/02/2024	21:50:25	3.54861	550
25/02/2024	22:00:25	3.55556	552
25/02/2024	22:10:25	3.5625	553
25/02/2024	22:20:25	3.56944	548
25/02/2024	22:30:25	3.57639	551
25/02/2024	22:40:25	3.58333	548
25/02/2024	22:50:25	3.59028	551
25/02/2024	23:00:25	3.59722	548
25/02/2024	23:10:25	3.60417	548
25/02/2024	23:20:25	3.61111	555
25/02/2024	23:30:25	3.61806	552
25/02/2024	23:40:25	3.625	549
25/02/2024	23:50:25	3.63194	549
26/02/2024	00:00:25	3.63889	549
26/02/2024	00:10:25	3.64583	546
26/02/2024	00:20:25	3.65278	546
26/02/2024	00:30:25	3.65972	548
26/02/2024	00:40:25	3.66667	548
26/02/2024	00:50:25	3.67361	548
26/02/2024	01:00:25	3.68056	545
26/02/2024	01:10:25	3.6875	547
26/02/2024	01:20:25	3.69444	544
26/02/2024	01:30:25	3.70139	539
26/02/2024	01:40:25	3.70833	541
26/02/2024	01:50:25	3.71528	542
26/02/2024	02:00:25	3.72222	548
26/02/2024	02:10:25	3.72917	545
26/02/2024	02:20:25	3.73611	546
26/02/2024	02:30:25	3.74306	545
26/02/2024	02:40:25	3.75	548
26/02/2024	02:50:25	3.75694	540
26/02/2024	03:00:25	3.76389	543
26/02/2024	03:10:25	3.77083	540
26/02/2024	03:20:25	3.77778	544
26/02/2024	03:30:25	3.78472	543
26/02/2024	03:40:25	3.79167	540
26/02/2024	03:50:25	3.79861	541
26/02/2024	04:00:25	3.80556	541
26/02/2024	04:10:25	3.8125	540
26/02/2024	04:20:25	3.81944	540
26/02/2024	04:30:25	3.82639	540
26/02/2024	04:40:25	3.83333	539
26/02/2024	04:50:25	3.84028	539
26/02/2024	05:00:25	3.84722	543
26/02/2024	05:10:25	3.85417	541
26/02/2024	05:20:26	3.86111	543
26/02/2024	05:30:26	3.86806	546
26/02/2024	05:40:26	3.875	543
26/02/2024	05:50:26	3.88194	544
26/02/2024	06:00:26	3.88889	540
26/02/2024	06:10:26	3.89583	539
26/02/2024	06:20:26	3.90278	535
26/02/2024	06:30:26	3.90972	537
26/02/2024	06:40:26	3.91667	545
26/02/2024	06:50:26	3.92361	543
26/02/2024	07:00:26	3.93056	544
26/02/2024	07:10:26	3.9375	539
26/02/2024	07:20:26	3.94444	537
26/02/2024	07:30:26	3.95139	539
26/02/2024	07:40:26	3.95833	540
26/02/2024	07:50:26	3.96528	539
26/02/2024	08:00:26	3.97222	541
26/02/2024	08:10:26	3.97917	540
26/02/2024	08:20:26	3.98611	537
26/02/2024	08:30:26	3.99306	540
26/02/2024	08:40:26	4	536
26/02/2024	08:50:26	4.00694	528
26/02/2024	09:00:26	4.01389	528
26/02/2024	09:10:26	4.02083	526
26/02/2024	09:20:26	4.02778	524
26/02/2024	09:30:26	4.03472	530
26/02/2024	09:40:26	4.04167	535
26/02/2024	09:50:26	4.04861	529
26/02/2024	10:00:26	4.05556	533
26/02/2024	10:10:26	4.0625	529
26/02/2024	10:20:26	4.06944	530
26/02/2024	10:30:26	4.07639	534
26/02/2024	10:40:26	4.08333	532
26/02/2024	10:50:26	4.09028	530
26/02/2024	11:00:26	4.09722	533
26/02/2024	11:10:26	4.10417	527
26/02/2024	11:20:26	4.11111	533
26/02/2024	11:30:26	4.11806	538
26/02/2024	11:40:26	4.125	533
26/02/2024	11:50:26	4.13194	533
26/02/2024	12:00:26	4.13889	535
26/02/2024	12:10:26	4.14583	538
26/02/2024	12:20:26	4.15278	531
26/02/2024	12:30:26	4.15972	535
26/02/2024	12:40:26	4.16667	534
26/02/2024	12:50:26	4.17361	535
26/02/2024	13:00:26	4.18056	534
26/02/2024	13:10:26	4.1875	531
26/02/2024	13:20:26	4.19444	532
26/02/2024	13:30:26	4.20139	533
26/02/2024	13:40:26	4.20833	538
26/02/2024	13:50:26	4.21528	529
26/02/2024	14:00:26	4.22222	531
26/02/2024	14:10:26	4.22917	532
26/02/2024	14:20:26	4.23611	539
26/02/2024	14:30:27	4.24306	537
26/02/2024	14:40:27	4.25	533
26/02/2024	14:50:27	4.25694	537
26/02/2024	15:00:27	4.26389	539
26/02/2024	15:10:27	4.27083	546
26/02/2024	15:20:27	4.27778	554
26/02/2024	15:30:27	4.28472	547
26/02/2024	15:40:27	4.29167	549
26/02/2024	15:50:27	4.29861	548
26/02/2024	16:00:27	4.30556	551
26/02/2024	16:10:27	4.3125	553
26/02/2024	16:20:27	4.31944	551
26/02/2024	16:30:27	4.32639	548
26/02/2024	16:40:27	4.33333	549
26/02/2024	16:50:27	4.34028	550
26/02/2024	17:00:27	4.34722	553
26/02/2024	17:10:27	4.35417	555
26/02/2024	17:20:27	4.36111	554
26/02/2024	17:30:27	4.36806	551
26/02/2024	17:40:27	4.375	551
26/02/2024	17:50:27	4.38194	553
26/02/2024	18:00:27	4.38889	548
26/02/2024	18:10:27	4.39583	549
26/02/2024	18:20:27	4.40278	549
26/02/2024	18:30:27	4.40972	551
26/02/2024	18:40:27	4.41667	556
26/02/2024	18:50:27	4.42361	554
26/02/2024	19:00:27	4.43056	563
26/02/2024	19:10:27	4.4375	558
26/02/2024	19:20:27	4.44444	560
26/02/2024	19:30:27	4.45139	555
26/02/2024	19:40:27	4.45833	559
26/02/2024	19:50:27	4.46528	551
26/02/2024	20:00:27	4.47222	554
26/02/2024	20:10:27	4.47917	553
26/02/2024	20:20:27	4.48611	548
26/02/2024	20:30:27	4.49306	551
26/02/2024	20:40:27	4.5	554
26/02/2024	20:50:27	4.50694	563
26/02/2024	21:00:27	4.51389	566
26/02/2024	21:10:27	4.52083	563
26/02/2024	21:20:27	4.52778	558
26/02/2024	21:30:27	4.53472	556
26/02/2024	21:40:27	4.54167	561
26/02/2024	21:50:27	4.54861	562
26/02/2024	22:00:27	4.55556	565
26/02/2024	22:10:27	4.5625	555
26/02/2024	22:20:27	4.56944	556
26/02/2024	22:30:27	4.57639	554
26/02/2024	22:40:27	4.58333	552
26/02/2024	22:50:27	4.59028	555
26/02/2024	23:00:27	4.59722	549
26/02/2024	23:10:27	4.60417	554
26/02/2024	23:20:27	4.61111	551
26/02/2024	23:30:27	4.61806	545
26/02/2024	23:40:27	4.625	553
26/02/2024	23:50:27	4.63194	558
27/02/2024	00:00:27	4.63889	549
27/02/2024	00:10:28	4.64583	554
27/02/2024	00:20:28	4.65278	550
27/02/2024	00:30:28	4.65972	553
27/02/2024	00:40:28	4.66667	551
27/02/2024	00:50:28	4.67361	556
27/02/2024	01:00:28	4.68056	553
27/02/2024	01:10:28	4.6875	556
27/02/2024	01:20:28	4.69444	556
27/02/2024	01:30:28	4.70139	562
27/02/2024	01:40:28	4.70833	563
27/02/2024	01:50:28	4.71528	555
27/02/2024	02:00:28	4.72222	553
27/02/2024	02:10:28	4.72917	549
27/02/2024	02:20:28	4.73611	555
27/02/2024	02:30:28	4.74306	559
27/02/2024	02:40:28	4.75	555
27/02/2024	02:50:28	4.75694	557
27/02/2024	03:00:28	4.76389	554
27/02/2024	03:10:28	4.77083	554
27/02/2024	03:20:28	4.77778	562
27/02/2024	03:30:28	4.78472	551
27/02/2024	03:40:28	4.79167	549
27/02/2024	03:50:28	4.79861	557
27/02/2024	04:00:28	4.80556	558
27/02/2024	04:10:28	4.8125	557
27/02/2024	04:20:28	4.81944	558
27/02/2024	04:30:28	4.82639	556
27/02/2024	04:40:28	4.83333	548
27/02/2024	04:50:28	4.84028	552
27/02/2024	05:00:28	4.84722	553
27/02/2024	05:10:28	4.85417	557
27/02/2024	05:20:28	4.86111	555
27/02/2024	05:30:28	4.86806	557
27/02/2024	05:40:28	4.875	557
27/02/2024	05:50:28	4.88194	559
27/02/2024	06:00:28	4.88889	556
27/02/2024	06:10:28	4.89583	555
27/02/2024	06:20:28	4.90278	559
27/02/2024	06:30:28	4.90972	560
27/02/2024	06:40:28	4.91667	556
27/02/2024	06:50:28	4.92361	563
27/02/2024	07:00:28	4.93056	554
27/02/2024	07:10:28	4.9375	543
27/02/2024	07:20:28	4.94444	547
27/02/2024	07:30:28	4.95139	550
27/02/2024	07:40:28	4.95833	553
27/02/2024	07:50:28	4.96528	552
27/02/2024	08:00:28	4.97222	557
27/02/2024	08:10:28	4.97917	559
27/02/2024	08:20:28	4.98611	554
27/02/2024	08:30:28	4.99306	551
27/02/2024	08:40:28	5	552
27/02/2024	08:50:28	5.00694	560
27/02/2024	09:00:28	5.01389	554
27/02/2024	09:10:28	5.02083	555
27/02/2024	09:20:28	5.02778	560
27/02/2024	09:30:28	5.03472	552
27/02/2024	09:40:28	5.04167	557
27/02/2024	09:50:29	5.04861	554
27/02/2024	10:00:29	5.05556	555
27/02/2024	10:10:29	5.0625	561
27/02/2024	10:20:29	5.06944	550
27/02/2024	10:30:29	5.07639	548
27/02/2024	10:40:29	5.08333	555
27/02/2024	10:50:29	5.09028	552
27/02/2024	11:00:29	5.09722	553
27/02/2024	11:10:29	5.10417	552
27/02/2024	11:20:29	5.11111	553
27/02/2024	11:30:29	5.11806	554
27/02/2024	11:40:29	5.125	545
27/02/2024	11:50:29	5.13194	550
27/02/2024	12:00:29	5.13889	556
27/02/2024	12:10:29	5.14583	555
27/02/2024	12:20:29	5.15278	551
27/02/2024	12:30:29	5.15972	551
27/02/2024	12:40:29	5.16667	560
27/02/2024	12:50:29	5.17361	559
27/02/2024	13:00:29	5.18056	563
27/02/2024	13:10:29	5.1875	565
27/02/2024	13:20:29	5.19444	565
27/02/2024	13:30:29	5.20139	555
27/02/2024	13:40:29	5.20833	557
27/02/2024	13:50:29	5.21528	550
27/02/2024	14:00:29	5.22222	557
27/02/2024	14:10:29	5.22917	557
27/02/2024	14:20:29	5.23611	563
27/02/2024	14:30:29	5.24306	559
27/02/2024	14:40:29	5.25	566
27/02/2024	14:50:29	5.25694	565
27/02/2024	15:00:29	5.26389	562
27/02/2024	15:10:29	5.27083	560
27/02/2024	15:20:29	5.27778	562
27/02/2024	15:30:29	5.28472	567
27/02/2024	15:40:29	5.29167	563
27/02/2024	15:50:29	5.29861	564
27/02/2024	16:00:29	5.30556	568
27/02/2024	16:10:29	5.3125	560
27/02/2024	16:20:29	5.31944	566
27/02/2024	16:30:29	5.32639	568
27/02/2024	16:40:29	5.33333	567
27/02/2024	16:50:29	5.34028	556
27/02/2024	17:00:29	5.34722	573
27/02/2024	17:10:29	5.35417	572
27/02/2024	17:20:29	5.36111	575
27/02/2024	17:30:29	5.36806	576
27/02/2024	17:40:29	5.375	570
27/02/2024	17:50:29	5.38194	572
27/02/2024	18:00:29	5.38889	580
27/02/2024	18:10:29	5.39583	571
27/02/2024	18:20:29	5.40278	576
27/02/2024	18:30:29	5.40972	571
27/02/2024	18:40:29	5.41667	569
27/02/2024	18:50:29	5.42361	570
27/02/2024	19:00:29	5.43056	575
27/02/2024	19:10:29	5.4375	570
27/02/2024	19:20:29	5.44444	573
27/02/2024	19:30:29	5.45139	576
27/02/2024	19:40:29	5.45833	574
27/02/2024	19:50:29	5.46528	579
27/02/2024	20:00:29	5.47222	581
27/02/2024	20:10:29	5.47917	576
27/02/2024	20:20:29	5.48611	584
27/02/2024	20:30:30	5.49306	586
27/02/2024	20:40:30	5.5	585
27/02/2024	20:50:30	5.50694	588
27/02/2024	21:00:30	5.51389	585
27/02/2024	21:10:30	5.52083	590
27/02/2024	21:20:30	5.52778	586
27/02/2024	21:30:30	5.53472	586
27/02/2024	21:40:30	5.54167	580
27/02/2024	21:50:30	5.54861	584
27/02/2024	22:00:30	5.55556	585
27/02/2024	22:10:30	5.5625	581
27/02/2024	22:20:30	5.56944	587
27/02/2024	22:30:30	5.57639	588
27/02/2024	22:40:30	5.58333	593
27/02/2024	22:50:30	5.59028	586
27/02/2024	23:00:30	5.59722	589
27/02/2024	23:10:30	5.60417	588
27/02/2024	23:20:30	5.61111	589
27/02/2024	23:30:30	5.61806	587
27/02/2024	23:40:30	5.625	586
27/02/2024	23:50:30	5.63194	586
28/02/2024	00:00:30	5.63889	589
28/02/2024	00:10:30	5.64583	590
28/02/2024	00:20:30	5.65278	592
28/02/2024	00:30:30	5.65972	588
28/02/2024	00:40:30	5.66667	590
28/02/2024	00:50:30	5.67361	593
28/02/2024	01:00:30	5.68056	594
28/02/2024	01:10:30	5.6875	587
28/02/2024	01:20:30	5.69444	591
28/02/2024	01:30:30	5.70139	590
28/02/2024	01:40:30	5.70833	584
28/02/2024	01:50:30	5.71528	590
28/02/2024	02:00:30	5.72222	585
28/02/2024	02:10:30	5.72917	582
28/02/2024	02:20:30	5.73611	579
28/02/2024	02:30:30	5.74306	581
28/02/2024	02:40:30	5.75	585
28/02/2024	02:50:30	5.75694	584
28/02/2024	03:00:30	5.76389	585
28/02/2024	03:10:30	5.77083	581
28/02/2024	03:20:30	5.77778	581
28/02/2024	03:30:30	5.78472	580
28/02/2024	03:40:30	5.79167	578
28/02/2024	03:50:30	5.79861	577
28/02/2024	04:00:30	5.80556	576
28/02/2024	04:10:30	5.8125	580
28/02/2024	04:20:30	5.81944	586
28/02/2024	04:30:30	5.82639	582
28/02/2024	04:40:31	5.83333	587
28/02/2024	04:50:31	5.84028	586
28/02/2024	05:00:31	5.84722	584
28/02/2024	05:10:31	5.85417	582
28/02/2024	05:20:31	5.86111	581
28/02/2024	05:30:31	5.86806	585
28/02/2024	05:40:31	5.875	583
28/02/2024	05:50:31	5.88194	586
28/02/2024	06:00:31	5.88889	585
28/02/2024	06:10:31	5.89583	586
28/02/2024	06:20:31	5.90278	584
28/02/2024	06:30:31	5.90972	593
28/02/2024	06:40:31	5.91667	587
28/02/2024	06:50:31	5.92361	586
28/02/2024	07:00:31	5.93056	583
28/02/2024	07:10:31	5.9375	583
28/02/2024	07:20:31	5.94444	585
28/02/2024	07:30:31	5.95139	584
28/02/2024	07:40:31	5.95833	580
28/02/2024	07:50:31	5.96528	581
28/02/2024	08:00:31	5.97222	584
28/02/2024	08:10:31	5.97917	579
28/02/2024	08:20:31	5.98611	587
28/02/2024	08:30:31	5.99306	591
28/02/2024	08:40:31	6	591
28/02/2024	08:50:31	6.00694	588
28/02/2024	09:00:31	6.01389	593
28/02/2024	09:10:31	6.02083	596
28/02/2024	09:20:31	6.02778	592
28/02/2024	09:30:31	6.03472	589
28/02/2024	09:40:31	6.04167	593
28/02/2024	09:50:31	6.04861	590
28/02/2024	10:00:31	6.05556	594
28/02/2024	10:10:31	6.0625	592
28/02/2024	10:20:31	6.06944	595
28/02/2024	10:30:31	6.07639	594
28/02/2024	10:40:31	6.08333	598
28/02/2024	10:50:31	6.09028	590
28/02/2024	11:00:31	6.09722	594
28/02/2024	11:10:31	6.10417	597
28/02/2024	11:20:31	6.11111	593
28/02/2024	11:30:31	6.11806	598
28/02/2024	11:40:31	6.125	600
28/02/2024	11:50:31	6.13194	595
28/02/2024	12:00:31	6.13889	595
28/02/2024	12:10:31	6.14583	598
28/02/2024	12:20:31	6.15278	592
28/02/2024	12:30:31	6.15972	589
28/02/2024	12:40:31	6.16667	593
28/02/2024	12:50:31	6.17361	595
28/02/2024	13:00:31	6.18056	597
28/02/2024	13:10:31	6.1875	596
28/02/2024	13:20:31	6.19444	594
28/02/2024	13:30:31	6.20139	595
28/02/2024	13:40:31	6.20833	590
28/02/2024	13:50:31	6.21528	592
28/02/2024	14:00:31	6.22222	589
28/02/2024	14:10:32	6.22917	588
28/02/2024	14:20:32	6.23611	590
28/02/2024	14:30:32	6.24306	595
28/02/2024	14:40:32	6.25	592
28/02/2024	14:50:32	6.25694	586
28/02/2024	15:00:32	6.26389	593
28/02/2024	15:10:32	6.27083	589
28/02/2024	15:20:32	6.27778	595
28/02/2024	15:30:32	6.28472	589
28/02/2024	15:40:32	6.29167	589
28/02/2024	15:50:32	6.29861	587
28/02/2024	16:00:32	6.30556	589
28/02/2024	16:10:32	6.3125	594
28/02/2024	16:20:32	6.31944	596
28/02/2024	16:30:32	6.32639	595
28/02/2024	16:40:32	6.33333	599
28/02/2024	16:50:32	6.34028	601
28/02/2024	17:00:32	6.34722	600
28/02/2024	17:10:32	6.35417	600
28/02/2024	17:20:32	6.36111	595
28/02/2024	17:30:32	6.36806	600
28/02/2024	17:40:32	6.375	601
28/02/2024	17:50:32	6.38194	601
28/02/2024	18:00:32	6.38889	599
28/02/2024	18:10:32	6.39583	599
28/02/2024	18:20:32	6.40278	602
28/02/2024	18:30:32	6.40972	610
28/02/2024	18:40:32	6.41667	606
28/02/2024	18:50:32	6.42361	608
28/02/2024	19:00:32	6.43056	610
28/02/2024	19:10:32	6.4375	608
28/02/2024	19:20:32	6.44444	608
28/02/2024	19:30:32	6.45139	601
28/02/2024	19:40:32	6.45833	610
28/02/2024	19:50:32	6.46528	612
28/02/2024	20:00:32	6.47222	615
28/02/2024	20:10:32	6.47917	618
28/02/2024	20:20:32	6.48611	616
28/02/2024	20:30:32	6.49306	613
28/02/2024	20:40:32	6.5	614
28/02/2024	20:50:32	6.50694	612
28/02/2024	21:00:32	6.51389	612
28/02/2024	21:10:32	6.52083	620
28/02/2024	21:20:32	6.52778	616
28/02/2024	21:30:32	6.53472	620
28/02/2024	21:40:32	6.54167	618
28/02/2024	21:50:32	6.54861	612
28/02/2024	22:00:32	6.55556	612
28/02/2024	22:10:32	6.5625	611
28/02/2024	22:20:32	6.56944	617
28/02/2024	22:30:32	6.57639	612
28/02/2024	22:40:32	6.58333	615
28/02/2024	22:50:32	6.59028	620
28/02/2024	23:00:32	6.59722	619
28/02/2024	23:10:32	6.60417	620
28/02/2024	23:20:32	6.61111	618
28/02/2024	23:30:33	6.61806	620
28/02/2024	23:40:33	6.625	615
28/02/2024	23:50:33	6.63194	617
29/02/2024	00:00:33	6.63889	619
29/02/2024	00:10:33	6.64583	606
29/02/2024	00:20:33	6.65278	616
29/02/2024	00:30:33	6.65972	615
29/02/2024	00:40:33	6.66667	617
29/02/2024	00:50:33	6.67361	612
29/02/2024	01:00:33	6.68056	618
29/02/2024	01:10:33	6.6875	608
29/02/2024	01:20:33	6.69444	612
29/02/2024	01:30:33	6.70139	604
29/02/2024	01:40:33	6.70833	610
29/02/2024	01:50:33	6.71528	615
29/02/2024	02:00:33	6.72222	615
29/02/2024	02:10:33	6.72917	608
29/02/2024	02:20:33	6.73611	615
29/02/2024	02:30:33	6.74306	608
29/02/2024	02:40:33	6.75	609
29/02/2024	02:50:33	6.75694	610
29/02/2024	03:00:33	6.76389	615
29/02/2024	03:10:33	6.77083	609
29/02/2024	03:20:33	6.77778	610
29/02/2024	03:30:33	6.78472	608
29/02/2024	03:40:33	6.79167	612
29/02/2024	03:50:33	6.79861	610
29/02/2024	04:00:33	6.80556	606
29/02/2024	04:10:33	6.8125	610
29/02/2024	04:20:33	6.81944	606
29/02/2024	04:30:33	6.82639	609
29/02/2024	04:40:33	6.83333	607
29/02/2024	04:50:33	6.84028	606
29/02/2024	05:00:33	6.84722	605
29/02/2024	05:10:33	6.85417	606
29/02/2024	05:20:33	6.86111	607
29/02/2024	05:30:33	6.86806	612
29/02/2024	05:40:33	6.875	601
29/02/2024	05:50:33	6.88194	607
29/02/2024	06:00:33	6.88889	603
29/02/2024	06:10:33	6.89583	603
29/02/2024	06:20:33	6.90278	605
29/02/2024	06:30:33	6.90972	604
29/02/2024	06:40:33	6.91667	602
29/02/2024	06:50:33	6.92361	614
29/02/2024	07:00:33	6.93056	607
29/02/2024	07:10:33	6.9375	608
29/02/2024	07:20:33	6.94444	601
29/02/2024	07:30:33	6.95139	600
29/02/2024	07:40:33	6.95833	603
29/02/2024	07:50:33	6.96528	602
29/02/2024	08:00:33	6.97222	612
29/02/2024	08:10:33	6.97917	605
29/02/2024	08:20:33	6.98611	609
29/02/2024	08:30:34	6.99306	606
29/02/2024	08:40:34	7	601
29/02/2024	08:50:34	7.00694	599
29/02/2024	09:00:34	7.01389	600
29/02/2024	09:10:34	7.02083	604
29/02/2024	09:20:34	7.02778	599		second injection
29/02/2024	09:30:34	7.03472	600
29/02/2024	09:40:34	7.04167	600
29/02/2024	09:50:34	7.04861	601
29/02/2024	10:00:34	7.05556	597
29/02/2024	10:10:34	7.0625	603
29/02/2024	10:20:34	7.06944	599
29/02/2024	10:30:34	7.07639	594
29/02/2024	10:40:34	7.08333	594
29/02/2024	10:50:34	7.09028	602
29/02/2024	11:00:34	7.09722	598
29/02/2024	11:10:34	7.10417	597
29/02/2024	11:20:34	7.11111	596
29/02/2024	11:30:34	7.11806	600
29/02/2024	11:40:34	7.125	597
29/02/2024	11:50:34	7.13194	599
29/02/2024	12:00:34	7.13889	599
29/02/2024	12:10:34	7.14583	599
29/02/2024	12:20:34	7.15278	600
29/02/2024	12:30:34	7.15972	600
29/02/2024	12:40:34	7.16667	601
29/02/2024	12:50:34	7.17361	605
29/02/2024	13:00:34	7.18056	600
29/02/2024	13:10:34	7.1875	601
29/02/2024	13:20:34	7.19444	598
29/02/2024	13:30:34	7.20139	599
29/02/2024	13:40:34	7.20833	596
29/02/2024	13:50:34	7.21528	596
29/02/2024	14:00:34	7.22222	600
29/02/2024	14:10:34	7.22917	595
29/02/2024	14:20:34	7.23611	595
29/02/2024	14:30:34	7.24306	600
29/02/2024	14:40:34	7.25	603
29/02/2024	14:50:34	7.25694	605
29/02/2024	15:00:34	7.26389	603
29/02/2024	15:10:34	7.27083	601
29/02/2024	15:20:34	7.27778	603
29/02/2024	15:30:34	7.28472	605
29/02/2024	15:40:34	7.29167	600
29/02/2024	15:50:34	7.29861	605
29/02/2024	16:00:34	7.30556	609
29/02/2024	16:10:35	7.3125	608
29/02/2024	16:20:35	7.31944	603
29/02/2024	16:30:35	7.32639	609
29/02/2024	16:40:35	7.33333	604
29/02/2024	16:50:35	7.34028	603
29/02/2024	17:00:35	7.34722	596
29/02/2024	17:10:35	7.35417	600
29/02/2024	17:20:35	7.36111	605
29/02/2024	17:30:35	7.36806	607
29/02/2024	17:40:35	7.375	609
29/02/2024	17:50:35	7.38194	608
29/02/2024	18:00:35	7.38889	610
29/02/2024	18:10:35	7.39583	614
29/02/2024	18:20:35	7.40278	609
29/02/2024	18:30:35	7.40972	606
29/02/2024	18:40:35	7.41667	607
29/02/2024	18:50:35	7.42361	609
29/02/2024	19:00:35	7.43056	615
29/02/2024	19:10:35	7.4375	613
29/02/2024	19:20:35	7.44444	619
29/02/2024	19:30:35	7.45139	617
29/02/2024	19:40:35	7.45833	606
29/02/2024	19:50:35	7.46528	615
29/02/2024	20:00:35	7.47222	612
29/02/2024	20:10:35	7.47917	614
29/02/2024	20:20:35	7.48611	617
29/02/2024	20:30:35	7.49306	612
29/02/2024	20:40:35	7.5	614
29/02/2024	20:50:35	7.50694	614
29/02/2024	21:00:35	7.51389	613
29/02/2024	21:10:35	7.52083	615
29/02/2024	21:20:35	7.52778	616
29/02/2024	21:30:35	7.53472	618
29/02/2024	21:40:35	7.54167	620
29/02/2024	21:50:35	7.54861	620
29/02/2024	22:00:35	7.55556	619
29/02/2024	22:10:35	7.5625	619
29/02/2024	22:20:35	7.56944	619
29/02/2024	22:30:35	7.57639	616
29/02/2024	22:40:35	7.58333	614
29/02/2024	22:50:35	7.59028	608
29/02/2024	23:00:35	7.59722	612
29/02/2024	23:10:35	7.60417	617
29/02/2024	23:20:35	7.61111	618
29/02/2024	23:30:35	7.61806	621
29/02/2024	23:40:35	7.625	608
29/02/2024	23:50:35	7.63194	609
2024-01-03	00:00:35	7.63889	616
2024-01-03	00:10:35	7.64583	612
2024-01-03	00:20:35	7.65278	624
2024-01-03	00:30:35	7.65972	624
2024-01-03	00:40:35	7.66667	619
2024-01-03	00:50:35	7.67361	618
2024-01-03	01:00:35	7.68056	612
2024-01-03	01:10:36	7.6875	623
2024-01-03	01:20:36	7.69444	613
2024-01-03	01:30:36	7.70139	609
2024-01-03	01:40:36	7.70833	606
2024-01-03	01:50:36	7.71528	613
2024-01-03	02:00:36	7.72222	607
2024-01-03	02:10:36	7.72917	614
2024-01-03	02:20:36	7.73611	616
2024-01-03	02:30:36	7.74306	615
2024-01-03	02:40:36	7.75	619
2024-01-03	02:50:36	7.75694	626
2024-01-03	03:00:36	7.76389	623
2024-01-03	03:10:36	7.77083	617
2024-01-03	03:20:36	7.77778	609
2024-01-03	03:30:36	7.78472	610
2024-01-03	03:40:36	7.79167	611
2024-01-03	03:50:36	7.79861	619
2024-01-03	04:00:36	7.80556	612
2024-01-03	04:10:36	7.8125	613
2024-01-03	04:20:36	7.81944	616
2024-01-03	04:30:36	7.82639	619
2024-01-03	04:40:36	7.83333	617
2024-01-03	04:50:36	7.84028	609
2024-01-03	05:00:36	7.84722	617
2024-01-03	05:10:36	7.85417	610
2024-01-03	05:20:36	7.86111	611
2024-01-03	05:30:36	7.86806	606
2024-01-03	05:40:36	7.875	610
2024-01-03	05:50:36	7.88194	607
2024-01-03	06:00:36	7.88889	603
2024-01-03	06:10:36	7.89583	604
2024-01-03	06:20:36	7.90278	609
2024-01-03	06:30:36	7.90972	610
2024-01-03	06:40:36	7.91667	610
2024-01-03	06:50:36	7.92361	608
2024-01-03	07:00:36	7.93056	609
2024-01-03	07:10:36	7.9375	611
2024-01-03	07:20:36	7.94444	606
2024-01-03	07:30:36	7.95139	607
2024-01-03	07:40:36	7.95833	608
2024-01-03	07:50:36	7.96528	612
2024-01-03	08:00:36	7.97222	612
2024-01-03	08:10:36	7.97917	615
2024-01-03	08:20:36	7.98611	603
2024-01-03	08:30:36	7.99306	604
2024-01-03	08:40:36	8	612
2024-01-03	08:50:36	8.00694	608
2024-01-03	09:00:36	8.01389	613
2024-01-03	09:10:36	8.02083	612
2024-01-03	09:20:36	8.02778	607
2024-01-03	09:30:36	8.03472	607
2024-01-03	09:40:36	8.04167	609
2024-01-03	09:50:36	8.04861	613
2024-01-03	10:00:36	8.05556	612
2024-01-03	10:10:36	8.0625	609
2024-01-03	10:20:36	8.06944	609
2024-01-03	10:30:36	8.07639	612
2024-01-03	10:40:36	8.08333	611
2024-01-03	10:50:36	8.09028	613
2024-01-03	11:00:36	8.09722	613
2024-01-03	11:10:36	8.10417	610
2024-01-03	11:20:36	8.11111	610
2024-01-03	11:30:37	8.11806	613
2024-01-03	11:40:37	8.125	611
2024-01-03	11:50:37	8.13194	616
2024-01-03	12:00:37	8.13889	617
2024-01-03	12:10:37	8.14583	614
2024-01-03	12:20:37	8.15278	615
2024-01-03	12:30:37	8.15972	615
2024-01-03	12:40:37	8.16667	612
2024-01-03	12:50:37	8.17361	612
2024-01-03	13:00:37	8.18056	617
2024-01-03	13:10:37	8.1875	616
2024-01-03	13:20:37	8.19444	617
2024-01-03	13:30:37	8.20139	617
2024-01-03	13:40:37	8.20833	612
2024-01-03	13:50:37	8.21528	615
2024-01-03	14:00:37	8.22222	617
2024-01-03	14:10:37	8.22917	614
2024-01-03	14:20:37	8.23611	617
2024-01-03	14:30:37	8.24306	616
2024-01-03	14:40:37	8.25	613
2024-01-03	14:50:37	8.25694	616
2024-01-03	15:00:37	8.26389	618
2024-01-03	15:10:37	8.27083	621
2024-01-03	15:20:37	8.27778	626
2024-01-03	15:30:37	8.28472	614
2024-01-03	15:40:37	8.29167	621
2024-01-03	15:50:37	8.29861	619
2024-01-03	16:00:37	8.30556	614
2024-01-03	16:10:37	8.3125	620
2024-01-03	16:20:37	8.31944	623
2024-01-03	16:30:37	8.32639	621
2024-01-03	16:40:37	8.33333	621
2024-01-03	16:50:37	8.34028	615
2024-01-03	17:00:37	8.34722	618
2024-01-03	17:10:37	8.35417	621
2024-01-03	17:20:37	8.36111	618
2024-01-03	17:30:37	8.36806	618
2024-01-03	17:40:37	8.375	616
2024-01-03	17:50:37	8.38194	617
2024-01-03	18:00:37	8.38889	615
2024-01-03	18:10:37	8.39583	625
2024-01-03	18:20:37	8.40278	624
2024-01-03	18:30:37	8.40972	627
2024-01-03	18:40:37	8.41667	629
2024-01-03	18:50:37	8.42361	632
2024-01-03	19:00:37	8.43056	631
2024-01-03	19:10:37	8.4375	626
2024-01-03	19:20:37	8.44444	621
2024-01-03	19:30:37	8.45139	627
2024-01-03	19:40:37	8.45833	627
2024-01-03	19:50:37	8.46528	625
2024-01-03	20:00:37	8.47222	625
2024-01-03	20:10:37	8.47917	636
2024-01-03	20:20:37	8.48611	628
2024-01-03	20:30:37	8.49306	635
2024-01-03	20:40:38	8.5	632
2024-01-03	20:50:38	8.50694	632
2024-01-03	21:00:38	8.51389	628
2024-01-03	21:10:38	8.52083	633
2024-01-03	21:20:38	8.52778	627
2024-01-03	21:30:38	8.53472	633
2024-01-03	21:40:38	8.54167	634
2024-01-03	21:50:38	8.54861	637
2024-01-03	22:00:38	8.55556	629
2024-01-03	22:10:38	8.5625	627
2024-01-03	22:20:38	8.56944	631
2024-01-03	22:30:38	8.57639	631
2024-01-03	22:40:38	8.58333	631
2024-01-03	22:50:38	8.59028	629
2024-01-03	23:00:38	8.59722	630
2024-01-03	23:10:38	8.60417	639
2024-01-03	23:20:38	8.61111	630
2024-01-03	23:30:38	8.61806	628
2024-01-03	23:40:38	8.625	620
2024-01-03	23:50:38	8.63194	623
2024-02-03	00:00:38	8.63889	623
2024-02-03	00:10:38	8.64583	624
2024-02-03	00:20:38	8.65278	625
2024-02-03	00:30:38	8.65972	625
2024-02-03	00:40:38	8.66667	629
2024-02-03	00:50:38	8.67361	623
2024-02-03	01:00:38	8.68056	624
2024-02-03	01:10:38	8.6875	631
2024-02-03	01:20:38	8.69444	625
2024-02-03	01:30:38	8.70139	630
2024-02-03	01:40:38	8.70833	627
2024-02-03	01:50:38	8.71528	619
2024-02-03	02:00:38	8.72222	625
2024-02-03	02:10:38	8.72917	624
2024-02-03	02:20:38	8.73611	618
2024-02-03	02:30:38	8.74306	622
2024-02-03	02:40:38	8.75	625
2024-02-03	02:50:38	8.75694	623
2024-02-03	03:00:38	8.76389	622
2024-02-03	03:10:38	8.77083	623
2024-02-03	03:20:38	8.77778	613
2024-02-03	03:30:38	8.78472	617
2024-02-03	03:40:38	8.79167	614
2024-02-03	03:50:38	8.79861	616
2024-02-03	04:00:38	8.80556	614
2024-02-03	04:10:38	8.8125	620
2024-02-03	04:20:38	8.81944	610
2024-02-03	04:30:38	8.82639	613
2024-02-03	04:40:38	8.83333	615
2024-02-03	04:50:38	8.84028	614
2024-02-03	05:00:38	8.84722	614
2024-02-03	05:10:38	8.85417	612
2024-02-03	05:20:38	8.86111	612
2024-02-03	05:30:38	8.86806	609
2024-02-03	05:40:39	8.875	622
2024-02-03	05:50:39	8.88194	619
2024-02-03	06:00:39	8.88889	617
2024-02-03	06:10:39	8.89583	616
2024-02-03	06:20:39	8.90278	618
2024-02-03	06:30:39	8.90972	614
2024-02-03	06:40:39	8.91667	607
2024-02-03	06:50:39	8.92361	608
2024-02-03	07:00:39	8.93056	614
2024-02-03	07:10:39	8.9375	607
2024-02-03	07:20:39	8.94444	609
2024-02-03	07:30:39	8.95139	616
2024-02-03	07:40:39	8.95833	613
2024-02-03	07:50:39	8.96528	616
2024-02-03	08:00:39	8.97222	616
2024-02-03	08:10:39	8.97917	613
2024-02-03	08:20:39	8.98611	612
2024-02-03	08:30:39	8.99306	616
2024-02-03	08:40:39	9	617
2024-02-03	08:50:39	9.00694	616
2024-02-03	09:00:39	9.01389	615
2024-02-03	09:10:39	9.02083	614
2024-02-03	09:20:39	9.02778	616
2024-02-03	09:30:39	9.03472	611
2024-02-03	09:40:39	9.04167	609
2024-02-03	09:50:39	9.04861	610
2024-02-03	10:00:39	9.05556	614
2024-02-03	10:10:39	9.0625	617
2024-02-03	10:20:39	9.06944	614
2024-02-03	10:30:39	9.07639	609
2024-02-03	10:40:39	9.08333	607
2024-02-03	10:50:39	9.09028	609
2024-02-03	11:00:39	9.09722	613
2024-02-03	11:10:39	9.10417	603
2024-02-03	11:20:39	9.11111	603
2024-02-03	11:30:39	9.11806	609
2024-02-03	11:40:39	9.125	605
2024-02-03	11:50:39	9.13194	609
2024-02-03	12:00:39	9.13889	610
2024-02-03	12:10:39	9.14583	607
2024-02-03	12:20:39	9.15278	607
2024-02-03	12:30:39	9.15972	610
2024-02-03	12:40:39	9.16667	602
2024-02-03	12:50:39	9.17361	605
2024-02-03	13:00:39	9.18056	604
2024-02-03	13:10:39	9.1875	607
2024-02-03	13:20:39	9.19444	600
2024-02-03	13:30:39	9.20139	607
2024-02-03	13:40:39	9.20833	601
2024-02-03	13:50:39	9.21528	611
2024-02-03	14:00:39	9.22222	606
2024-02-03	14:10:39	9.22917	597
2024-02-03	14:20:39	9.23611	606
2024-02-03	14:30:39	9.24306	604
2024-02-03	14:40:39	9.25	600
2024-02-03	14:50:40	9.25694	600
2024-02-03	15:00:40	9.26389	601
2024-02-03	15:10:40	9.27083	598
2024-02-03	15:20:40	9.27778	605
2024-02-03	15:30:40	9.28472	601
2024-02-03	15:40:40	9.29167	605
2024-02-03	15:50:40	9.29861	612
2024-02-03	16:00:40	9.30556	601
2024-02-03	16:10:40	9.3125	605
2024-02-03	16:20:40	9.31944	605
2024-02-03	16:30:40	9.32639	600
2024-02-03	16:40:40	9.33333	602
2024-02-03	16:50:40	9.34028	601
2024-02-03	17:00:40	9.34722	591
2024-02-03	17:10:40	9.35417	599
2024-02-03	17:20:40	9.36111	600
2024-02-03	17:30:40	9.36806	600
2024-02-03	17:40:40	9.375	603
2024-02-03	17:50:40	9.38194	602
2024-02-03	18:00:40	9.38889	601
2024-02-03	18:10:40	9.39583	596
2024-02-03	18:20:40	9.40278	594
2024-02-03	18:30:40	9.40972	591
2024-02-03	18:40:40	9.41667	587
2024-02-03	18:50:40	9.42361	592
2024-02-03	19:00:40	9.43056	596
2024-02-03	19:10:40	9.4375	592
2024-02-03	19:20:40	9.44444	596
2024-02-03	19:30:40	9.45139	591
2024-02-03	19:40:40	9.45833	591
2024-02-03	19:50:40	9.46528	591
2024-02-03	20:00:40	9.47222	592
2024-02-03	20:10:40	9.47917	593
2024-02-03	20:20:40	9.48611	589
2024-02-03	20:30:40	9.49306	595
2024-02-03	20:40:40	9.5	595
2024-02-03	20:50:40	9.50694	594
2024-02-03	21:00:40	9.51389	599
2024-02-03	21:10:40	9.52083	595
2024-02-03	21:20:40	9.52778	593
2024-02-03	21:30:40	9.53472	588
2024-02-03	21:40:40	9.54167	598
2024-02-03	21:50:40	9.54861	587
2024-02-03	22:00:40	9.55556	590
2024-02-03	22:10:40	9.5625	588
2024-02-03	22:20:40	9.56944	592
2024-02-03	22:30:40	9.57639	592
2024-02-03	22:40:40	9.58333	586
2024-02-03	22:50:40	9.59028	587
2024-02-03	23:00:40	9.59722	585
2024-02-03	23:10:40	9.60417	587
2024-02-03	23:20:40	9.61111	586
2024-02-03	23:30:40	9.61806	587
2024-02-03	23:40:40	9.625	582
2024-02-03	23:50:40	9.63194	581
2024-03-03	00:00:41	9.63889	586
2024-03-03	00:10:41	9.64583	581
2024-03-03	00:20:41	9.65278	584
2024-03-03	00:30:41	9.65972	586
2024-03-03	00:40:41	9.66667	580
2024-03-03	00:50:41	9.67361	578
2024-03-03	01:00:41	9.68056	582
2024-03-03	01:10:41	9.6875	576
2024-03-03	01:20:41	9.69444	579
2024-03-03	01:30:41	9.70139	579
2024-03-03	01:40:41	9.70833	579
2024-03-03	01:50:41	9.71528	580
2024-03-03	02:00:41	9.72222	576
2024-03-03	02:10:41	9.72917	581
2024-03-03	02:20:41	9.73611	576
2024-03-03	02:30:41	9.74306	575
2024-03-03	02:40:41	9.75	575
2024-03-03	02:50:41	9.75694	571
2024-03-03	03:00:41	9.76389	575
2024-03-03	03:10:41	9.77083	577
2024-03-03	03:20:41	9.77778	578
2024-03-03	03:30:41	9.78472	580
2024-03-03	03:40:41	9.79167	574
2024-03-03	03:50:41	9.79861	578
2024-03-03	04:00:41	9.80556	574
2024-03-03	04:10:41	9.8125	578
2024-03-03	04:20:41	9.81944	580
2024-03-03	04:30:41	9.82639	575
2024-03-03	04:40:41	9.83333	572
2024-03-03	04:50:41	9.84028	581
2024-03-03	05:00:41	9.84722	571
2024-03-03	05:10:41	9.85417	577
2024-03-03	05:20:41	9.86111	566
2024-03-03	05:30:41	9.86806	572
2024-03-03	05:40:41	9.875	578
2024-03-03	05:50:41	9.88194	572
2024-03-03	06:00:41	9.88889	573
2024-03-03	06:10:41	9.89583	573
2024-03-03	06:20:41	9.90278	571
2024-03-03	06:30:41	9.90972	563
2024-03-03	06:40:41	9.91667	577
2024-03-03	06:50:41	9.92361	573
2024-03-03	07:00:41	9.93056	574
2024-03-03	07:10:41	9.9375	567
2024-03-03	07:20:41	9.94444	573
2024-03-03	07:30:41	9.95139	574
2024-03-03	07:40:41	9.95833	570
2024-03-03	07:50:41	9.96528	569
2024-03-03	08:00:41	9.97222	570
2024-03-03	08:10:41	9.97917	568
2024-03-03	08:20:41	9.98611	569
2024-03-03	08:30:41	9.99306	570
2024-03-03	08:40:41	10	565
2024-03-03	08:50:41	10.0069	571
2024-03-03	09:00:41	10.0139	568
2024-03-03	09:10:42	10.0208	568
2024-03-03	09:20:42	10.0278	570
2024-03-03	09:30:42	10.0347	566
2024-03-03	09:40:42	10.0417	562
2024-03-03	09:50:42	10.0486	555
2024-03-03	10:00:42	10.0556	557
2024-03-03	10:10:42	10.0625	568
2024-03-03	10:20:42	10.0694	560
2024-03-03	10:30:42	10.0764	564
2024-03-03	10:40:42	10.0833	558
2024-03-03	10:50:42	10.0903	557
2024-03-03	11:00:42	10.0972	564
2024-03-03	11:10:42	10.1042	565
2024-03-03	11:20:42	10.1111	563
2024-03-03	11:30:42	10.1181	562
2024-03-03	11:40:42	10.125	564
2024-03-03	11:50:42	10.1319	562
2024-03-03	12:00:42	10.1389	565
2024-03-03	12:10:42	10.1458	566
2024-03-03	12:20:42	10.1528	568
2024-03-03	12:30:42	10.1597	560
2024-03-03	12:40:42	10.1667	559
2024-03-03	12:50:42	10.1736	562
2024-03-03	13:00:42	10.1806	557
2024-03-03	13:10:42	10.1875	555
2024-03-03	13:20:42	10.1944	555
2024-03-03	13:30:42	10.2014	558
2024-03-03	13:40:42	10.2083	557
2024-03-03	13:50:42	10.2153	556
2024-03-03	14:00:42	10.2222	559
2024-03-03	14:10:42	10.2292	556
2024-03-03	14:20:42	10.2361	563
2024-03-03	14:30:42	10.2431	563
2024-03-03	14:40:42	10.25	561
2024-03-03	14:50:42	10.2569	558
2024-03-03	15:00:42	10.2639	560
2024-03-03	15:10:42	10.2708	563
2024-03-03	15:20:42	10.2778	562
2024-03-03	15:30:42	10.2847	557
2024-03-03	15:40:42	10.2917	555
2024-03-03	15:50:42	10.2986	557
2024-03-03	16:00:42	10.3056	557
2024-03-03	16:10:42	10.3125	552
2024-03-03	16:20:42	10.3194	549
2024-03-03	16:30:42	10.3264	554
2024-03-03	16:40:42	10.3333	552
2024-03-03	16:50:42	10.3403	552
2024-03-03	17:00:42	10.3472	549
2024-03-03	17:10:42	10.3542	548
2024-03-03	17:20:42	10.3611	551
2024-03-03	17:30:42	10.3681	550
2024-03-03	17:40:42	10.375	548
2024-03-03	17:50:42	10.3819	549
2024-03-03	18:00:42	10.3889	546
2024-03-03	18:10:43	10.3958	547
2024-03-03	18:20:43	10.4028	544
2024-03-03	18:30:43	10.4097	542
2024-03-03	18:40:43	10.4167	546
2024-03-03	18:50:43	10.4236	546
2024-03-03	19:00:43	10.4306	549
2024-03-03	19:10:43	10.4375	553
2024-03-03	19:20:43	10.4444	550
2024-03-03	19:30:43	10.4514	550
2024-03-03	19:40:43	10.4583	553
2024-03-03	19:50:43	10.4653	546
2024-03-03	20:00:43	10.4722	553
2024-03-03	20:10:43	10.4792	548
2024-03-03	20:20:43	10.4861	553
45354	20:30:43	10.4931	552
45354	20:40:43	10.5	549
45354	20:50:43	10.5069	551
45354	21:00:43	10.5139	552
45354	21:10:43	10.5208	555
45354	21:20:43	10.5278	549
45354	21:30:43	10.5347	550
45354	21:40:43	10.5417	553
45354	21:50:43	10.5486	544
45354	22:00:43	10.5556	547
45354	22:10:43	10.5625	541
45354	22:20:43	10.5694	541
45354	22:30:43	10.5764	543
45354	22:40:43	10.5833	544
45354	22:50:43	10.5903	545
45354	23:00:43	10.5972	539
45354	23:10:43	10.6042	534
45354	23:20:43	10.6111	538
45354	23:30:43	10.6181	538
45354	23:40:43	10.625	536
45354	23:50:43	10.6319	535
45385	00:00:43	10.6389	539
45385	00:10:43	10.6458	542
45385	00:20:43	10.6528	538
45385	00:30:43	10.6597	536
45385	00:40:43	10.6667	534
45385	00:50:43	10.6736	535
45385	01:00:43	10.6806	535
45385	01:10:43	10.6875	533
45385	01:20:43	10.6944	534
45385	01:30:43	10.7014	535
45385	01:40:43	10.7083	541
45385	01:50:43	10.7153	536
45385	02:00:43	10.7222	537
45385	02:10:43	10.7292	533
45385	02:20:43	10.7361	533
45385	02:30:43	10.7431	538
45385	02:40:44	10.75	537
45385	02:50:44	10.7569	539
45385	03:00:44	10.7639	538
45385	03:10:44	10.7708	540
45385	03:20:44	10.7778	536
45385	03:30:44	10.7847	537
45385	03:40:44	10.7917	534
45385	03:50:44	10.7986	536
45385	04:00:44	10.8056	536
45385	04:10:44	10.8125	533
45385	04:20:44	10.8194	537
45385	04:30:44	10.8264	533
45385	04:40:44	10.8333	536
45385	04:50:44	10.8403	532
45385	05:00:44	10.8472	536
45385	05:10:44	10.8542	535
45385	05:20:44	10.8611	533
45385	05:30:44	10.8681	533
45385	05:40:44	10.875	533
45385	05:50:44	10.8819	531
45385	06:00:44	10.8889	533
45385	06:10:44	10.8958	535
45385	06:20:44	10.9028	535
45385	06:30:44	10.9097	533
45385	06:40:44	10.9167	531
45385	06:50:44	10.9236	531
45385	07:00:44	10.9306	527
45385	07:10:44	10.9375	528
45385	07:20:44	10.9444	532
45385	07:30:44	10.9514	531
45385	07:40:44	10.9583	531
45385	07:50:44	10.9653	528
45385	08:00:44	10.9722	530
45385	08:10:44	10.9792	525
45385	08:20:44	10.9861	523
45385	08:30:44	10.9931	526
45385	08:40:44	11	527
45385	08:50:44	11.0069	522
45385	09:00:44	11.0139	526
45385	09:10:44	11.0208	522
45385	09:20:44	11.0278	527
45385	09:30:44	11.0347	526
45385	09:40:44	11.0417	527
45385	09:50:44	11.0486	519
45385	10:00:44	11.0556	522
45385	10:10:44	11.0625	527
45385	10:20:44	11.0694	527
45385	10:30:44	11.0764	526
45385	10:40:44	11.0833	530
45385	10:50:44	11.0903	527
45385	11:00:44	11.0972	525
45385	11:10:44	11.1042	532
45385	11:20:44	11.1111	531
45385	11:30:44	11.1181	535
45385	11:40:44	11.125	539
45385	11:50:44	11.1319	536
45385	12:00:44	11.1389	537
45385	12:10:44	11.1458	538
45385	12:20:45	11.1528	541
45385	12:30:45	11.1597	542
45385	12:40:45	11.1667	542
45385	12:50:45	11.1736	541
45385	13:00:45	11.1806	542
45385	13:10:45	11.1875	539
45385	13:20:45	11.1944	535
45385	13:30:45	11.2014	543
45385	13:40:45	11.2083	542
45385	13:50:45	11.2153	542
45385	14:00:45	11.2222	545
45385	14:10:45	11.2292	542
45385	14:20:45	11.2361	550
45385	14:30:45	11.2431	546
45385	14:40:45	11.25	549
45385	14:50:45	11.2569	546
45385	15:00:45	11.2639	550
45385	15:10:45	11.2708	551
45385	15:20:45	11.2778	555
45385	15:30:45	11.2847	561
45385	15:40:45	11.2917	556
45385	15:50:45	11.2986	556
45385	16:00:45	11.3056	561
45385	16:10:45	11.3125	560
45385	16:20:45	11.3194	567
45385	16:30:45	11.3264	562
45385	16:40:45	11.3333	559
45385	16:50:45	11.3403	557
45385	17:00:45	11.3472	560
45385	17:10:45	11.3542	563
45385	17:20:45	11.3611	559
45385	17:30:45	11.3681	563
45385	17:40:45	11.375	564
45385	17:50:45	11.3819	564
45385	18:00:45	11.3889	566
45385	18:10:45	11.3958	565
45385	18:20:45	11.4028	566
45385	18:30:45	11.4097	564
45385	18:40:45	11.4167	570
45385	18:50:45	11.4236	569
45385	19:00:45	11.4306	572
45385	19:10:45	11.4375	570
45385	19:20:45	11.4444	575
45385	19:30:45	11.4514	578
45385	19:40:45	11.4583	576
45385	19:50:45	11.4653	577
45385	20:00:45	11.4722	580
45385	20:10:45	11.4792	570
45385	20:20:45	11.4861	573
45385	20:30:45	11.4931	576
45385	20:40:45	11.5	578
45385	20:50:45	11.5069	574
45385	21:00:45	11.5139	578
45385	21:10:45	11.5208	585
45385	21:20:45	11.5278	582
45385	21:30:45	11.5347	583
45385	21:40:45	11.5417	584
45385	21:50:45	11.5486	589
45385	22:00:45	11.5556	578
45385	22:10:45	11.5625	582
45385	22:20:46	11.5694	581
45385	22:30:46	11.5764	586
45385	22:40:46	11.5833	584
45385	22:50:46	11.5903	577
45385	23:00:46	11.5972	582
45385	23:10:46	11.6042	579
45385	23:20:46	11.6111	581
45385	23:30:46	11.6181	574
45385	23:40:46	11.625	575
45385	23:50:46	11.6319	575
45415	00:00:46	11.6389	579
45415	00:10:46	11.6458	577
45415	00:20:46	11.6528	580
45415	00:30:46	11.6597	574
45415	00:40:46	11.6667	584
45415	00:50:46	11.6736	582
45415	01:00:46	11.6806	578
45415	01:10:46	11.6875	580
45415	01:20:46	11.6944	578
45415	01:30:46	11.7014	579
45415	01:40:46	11.7083	584
45415	01:50:46	11.7153	579
45415	02:00:46	11.7222	577
45415	02:10:46	11.7292	574
45415	02:20:46	11.7361	574
45415	02:30:46	11.7431	578
45415	02:40:46	11.75	578
45415	02:50:46	11.7569	582
45415	03:00:46	11.7639	580
45415	03:10:46	11.7708	576
45415	03:20:46	11.7778	582
45415	03:30:46	11.7847	581
45415	03:40:46	11.7917	580
45415	03:50:46	11.7986	572
45415	04:00:46	11.8056	578
45415	04:10:46	11.8125	576
45415	04:20:46	11.8194	585
45415	04:30:46	11.8264	583
45415	04:40:46	11.8333	580
45415	04:50:46	11.8403	581
45415	05:00:46	11.8472	578
45415	05:10:46	11.8542	573
45415	05:20:46	11.8611	577
45415	05:30:46	11.8681	578
45415	05:40:46	11.875	576
45415	05:50:46	11.8819	576
45415	06:00:46	11.8889	575
45415	06:10:46	11.8958	572
45415	06:20:46	11.9028	580
45415	06:30:46	11.9097	580
45415	06:40:46	11.9167	576
45415	06:50:46	11.9236	576
45415	07:00:46	11.9306	572
45415	07:10:46	11.9375	568
45415	07:20:46	11.9444	571
45415	07:30:47	11.9514	572
45415	07:40:47	11.9583	578
45415	07:50:47	11.9653	578
45415	08:00:47	11.9722	575
45415	08:10:47	11.9792	576
45415	08:20:47	11.9861	579
45415	08:30:47	11.9931	580
45415	08:40:47	12	578
45415	08:50:47	12.0069	572
45415	09:00:47	12.0139	573
45415	09:10:47	12.0208	580
45415	09:20:47	12.0278	586
45415	09:30:47	12.0347	583
45415	09:40:47	12.0417	579
45415	09:50:47	12.0486	576
45415	10:00:47	12.0556	580
45415	10:10:47	12.0625	585
45415	10:20:47	12.0694	578
45415	10:30:47	12.0764	578
45415	10:40:47	12.0833	584
45415	10:50:47	12.0903	582
45415	11:00:47	12.0972	589
45415	11:10:47	12.1042	588
45415	11:20:47	12.1111	581
45415	11:30:47	12.1181	581
45415	11:40:47	12.125	582
45415	11:50:47	12.1319	585
45415	12:00:47	12.1389	582
45415	12:10:47	12.1458	581
45415	12:20:47	12.1528	590
45415	12:30:47	12.1597	585
45415	12:40:47	12.1667	584
45415	12:50:47	12.1736	579
45415	13:00:47	12.1806	580
45415	13:10:47	12.1875	579
45415	13:20:47	12.1944	587
45415	13:30:47	12.2014	580
45415	13:40:47	12.2083	585
45415	13:50:47	12.2153	577
45415	14:00:47	12.2222	577
45415	14:10:47	12.2292	582
45415	14:20:47	12.2361	578
45415	14:30:47	12.2431	578
45415	14:40:47	12.25	586
45415	14:50:47	12.2569	579
45415	15:00:47	12.2639	588
45415	15:10:47	12.2708	588
45415	15:20:47	12.2778	587
45415	15:30:47	12.2847	592
45415	15:40:47	12.2917	589
45415	15:50:47	12.2986	593
45415	16:00:47	12.3056	589
45415	16:10:47	12.3125	592
45415	16:20:47	12.3194	592
45415	16:30:47	12.3264	591
45415	16:40:47	12.3333	590
45415	16:50:47	12.3403	595
45415	17:00:48	12.3472	593
45415	17:10:48	12.3542	590
45415	17:20:48	12.3611	591
45415	17:30:48	12.3681	591
45415	17:40:48	12.375	594
45415	17:50:48	12.3819	600
45415	18:00:48	12.3889	599
45415	18:10:48	12.3958	597
45415	18:20:48	12.4028	589
45415	18:30:48	12.4097	593
45415	18:40:48	12.4167	591
45415	18:50:48	12.4236	594
45415	19:00:48	12.4306	591
45415	19:10:48	12.4375	600
45415	19:20:48	12.4444	605
45415	19:30:48	12.4514	601
45415	19:40:48	12.4583	605
45415	19:50:48	12.4653	609
45415	20:00:48	12.4722	609
45415	20:10:48	12.4792	606
45415	20:20:48	12.4861	604
45415	20:30:48	12.4931	603
45415	20:40:48	12.5	603
45415	20:50:48	12.5069	602
45415	21:00:48	12.5139	606
45415	21:10:48	12.5208	605
45415	21:20:48	12.5278	605
45415	21:30:48	12.5347	608
45415	21:40:48	12.5417	605
45415	21:50:48	12.5486	599
45415	22:00:48	12.5556	604
45415	22:10:48	12.5625	607
45415	22:20:48	12.5694	604
45415	22:30:48	12.5764	613
45415	22:40:48	12.5833	613
45415	22:50:48	12.5903	605
45415	23:00:48	12.5972	605
45415	23:10:48	12.6042	603
45415	23:20:48	12.6111	604
45415	23:30:48	12.6181	602
45415	23:40:48	12.625	602
45415	23:50:48	12.6319	606
45446	00:00:48	12.6389	602
45446	00:10:48	12.6458	604
45446	00:20:48	12.6528	603
45446	00:30:48	12.6597	604
45446	00:40:48	12.6667	610
45446	00:50:49	12.6736	610
45446	01:00:49	12.6806	606
45446	01:10:49	12.6875	599
45446	01:20:49	12.6944	598
45446	01:30:49	12.7014	600
45446	01:40:49	12.7083	600
45446	01:50:49	12.7153	599
45446	02:00:49	12.7222	598
45446	02:10:49	12.7292	599
45446	02:20:49	12.7361	600
45446	02:30:49	12.7431	599
45446	02:40:49	12.75	601
45446	02:50:49	12.7569	602
45446	03:00:49	12.7639	598
45446	03:10:49	12.7708	593
45446	03:20:49	12.7778	597
45446	03:30:49	12.7847	592
45446	03:40:49	12.7917	594
45446	03:50:49	12.7986	596
45446	04:00:49	12.8056	602
45446	04:10:49	12.8125	597
45446	04:20:49	12.8194	598
45446	04:30:49	12.8264	595
45446	04:40:49	12.8333	590
45446	04:50:49	12.8403	587
45446	05:00:49	12.8472	584
45446	05:10:49	12.8542	588
45446	05:20:49	12.8611	590
45446	05:30:49	12.8681	581
45446	05:40:49	12.875	586
45446	05:50:49	12.8819	590
45446	06:00:49	12.8889	584
45446	06:10:49	12.8958	595
45446	06:20:49	12.9028	586
45446	06:30:49	12.9097	584
45446	06:40:49	12.9167	586
45446	06:50:49	12.9236	583
45446	07:00:49	12.9306	585
45446	07:10:49	12.9375	587
45446	07:20:49	12.9444	594
45446	07:30:49	12.9514	585
45446	07:40:49	12.9583	583
45446	07:50:49	12.9653	581
45446	08:00:49	12.9722	587
45446	08:10:49	12.9792	587
45446	08:20:49	12.9861	592
45446	08:30:49	12.9931	594
45446	08:40:49	13	589
45446	08:50:49	13.0069	583
45446	09:00:49	13.0139	586
45446	09:10:49	13.0208	585
45446	09:20:49	13.0278	585
45446	09:30:49	13.0347	589
45446	09:40:49	13.0417	587
45446	09:50:50	13.0486	589
45446	10:00:50	13.0556	585
45446	10:10:50	13.0625	593
45446	10:20:50	13.0694	592
45446	10:30:50	13.0764	587
45446	10:40:50	13.0833	581
45446	10:50:50	13.0903	586
45446	11:00:50	13.0972	584
45446	11:10:50	13.1042	588
45446	11:20:50	13.1111	590
45446	11:30:50	13.1181	583
45446	11:40:50	13.125	589
45446	11:50:50	13.1319	593
45446	12:00:50	13.1389	587
45446	12:10:50	13.1458	592
45446	12:20:50	13.1528	588
45446	12:30:50	13.1597	595
45446	12:40:50	13.1667	593
45446	12:50:50	13.1736	596
45446	13:00:50	13.1806	596
45446	13:10:50	13.1875	593
45446	13:20:50	13.1944	593
45446	13:30:50	13.2014	593
45446	13:40:50	13.2083	593
45446	13:50:50	13.2153	595
45446	14:00:50	13.2222	592
45446	14:10:50	13.2292	594
45446	14:20:50	13.2361	598
45446	14:30:50	13.2431	600
45446	14:40:50	13.25	602
45446	14:50:50	13.2569	598
45446	15:00:50	13.2639	598
45446	15:10:50	13.2708	601
45446	15:20:50	13.2778	600
45446	15:30:50	13.2847	603
45446	15:40:50	13.2917	607
45446	15:50:50	13.2986	603
45446	16:00:50	13.3056	599
45446	16:10:50	13.3125	600
45446	16:20:50	13.3194	605
45446	16:30:50	13.3264	603
45446	16:40:50	13.3333	599
45446	16:50:50	13.3403	604
45446	17:00:50	13.3472	601
45446	17:10:50	13.3542	601
45446	17:20:50	13.3611	603
45446	17:30:50	13.3681	604
45446	17:40:50	13.375	606
45446	17:50:50	13.3819	613
45446	18:00:50	13.3889	606
45446	18:10:50	13.3958	601
45446	18:20:50	13.4028	609
45446	18:30:50	13.4097	611
45446	18:40:50	13.4167	610
45446	18:50:50	13.4236	606
45446	19:00:51	13.4306	602
45446	19:10:51	13.4375	601
45446	19:20:51	13.4444	604
45446	19:30:51	13.4514	604
45446	19:40:51	13.4583	605
45446	19:50:51	13.4653	607
45446	20:00:51	13.4722	609
45446	20:10:51	13.4792	615
45446	20:20:51	13.4861	612
45446	20:30:51	13.4931	607
45446	20:40:51	13.5	609
45446	20:50:51	13.5069	610
45446	21:00:51	13.5139	614
45446	21:10:51	13.5208	616
45446	21:20:51	13.5278	618
45446	21:30:51	13.5347	617
45446	21:40:51	13.5417	615
45446	21:50:51	13.5486	615
45446	22:00:51	13.5556	615
45446	22:10:51	13.5625	613
45446	22:20:51	13.5694	614
45446	22:30:51	13.5764	614
45446	22:40:51	13.5833	616
45446	22:50:51	13.5903	618
45446	23:00:51	13.5972	618
45446	23:10:51	13.6042	616
45446	23:20:51	13.6111	612
45446	23:30:51	13.6181	614
45446	23:40:51	13.625	622
45446	23:50:51	13.6319	620
45476	00:00:51	13.6389	617
45476	00:10:51	13.6458	614
45476	00:20:51	13.6528	615
45476	00:30:51	13.6597	614
45476	00:40:51	13.6667	615
45476	00:50:51	13.6736	613
45476	01:00:51	13.6806	615
45476	01:10:51	13.6875	610
45476	01:20:51	13.6944	611
45476	01:30:51	13.7014	610
45476	01:40:51	13.7083	612
45476	01:50:51	13.7153	610
45476	02:00:51	13.7222	612
45476	02:10:51	13.7292	607
45476	02:20:51	13.7361	609
45476	02:30:51	13.7431	609
45476	02:40:51	13.75	601
45476	02:50:51	13.7569	608
45476	03:00:51	13.7639	605
45476	03:10:51	13.7708	608
45476	03:20:51	13.7778	610
45476	03:30:51	13.7847	608
45476	03:40:51	13.7917	611
45476	03:50:51	13.7986	622
45476	04:00:51	13.8056	615
45476	04:10:52	13.8125	611
45476	04:20:52	13.8194	609
45476	04:30:52	13.8264	611
45476	04:40:52	13.8333	610
45476	04:50:52	13.8403	615
45476	05:00:52	13.8472	613
45476	05:10:52	13.8542	612
45476	05:20:52	13.8611	609
45476	05:30:52	13.8681	609
45476	05:40:52	13.875	601
[truncated: 6,931 more rows]
